# Supplementary material for: A curated catalog of canine and equine keratin genes
Source: PLoS One. 2017 Aug 28;12(8):e0180359. doi: 10.1371/journal.pone.0180359 (PMC5573215; doi:10.1371/journal.pone.0180359)
Supplement: S1 Table — (XLSX) [file pone.0180359.s007.xlsx]

## Sheet: dog_cleaned_version
S1 Table. Compilation of existing RefSeqs for canine and equine keratin genes.
Dog
old NCBI gene symbol (annotation release 103)	GeneID	Current NCBI gene symbol(annotation release 104)	Description	Chromosome	Curated vs. RefSeq(annotation release 103)	Curated vs. RefSeq(annotation release 104)	RefSeq Accession (annotation release 103)	Updated RefSeq Accession (annotation release 104)	Curated vs. Ensembl (87)	Ensemble transcript ID (87)	ResSeq vs. Ensembl(87)	RNA-seq read coverage ok (y/n)	Curated mRNA sequence provided (y/n; File S1)
KRT1	444857	KRT1	Canis lupus familiaris keratin 1	27	Identical	Identical	NM_001003392.1	NM_001003392.1	Identical	ENSCAFT00000011567.2	Identical	y	y
KRT2	444850	KRT2	Canis lupus familiaris keratin 2	27	Identical	Identical	NM_001003386.2	NM_001003386.2	Identical	ENSCAFT00000011579.3	Identical	y	y
KRT3	486519	KRT127	Canis lupus familiaris keratin 3	27	Different	Different	XM_005637411.1	XM_005637411.1	NA	No Ensembl transcript	NA	y	y
LOC100683401	100683401	KRT3	Canis lupus familiaris keratin, type II cytoskeletal 3-like	27	Identical	Identical	XM_003433501.1	NM_001346012.1	Different (exon 1 split,difference in last exon)	ENSCAFT00000011634.3	Different (exon 1 split,difference in last exon)	y	y
KRT4	100682832	KRT4	Canis lupus familiaris keratin 4	27	Different	Identical	XM_003433498.1	NM_001346015.1	Different (first 2 and last exon)	ENSCAFT00000011548.3	Different (first 2 and last exon)	y	y
KRT5	100687760	KRT5	Canis lupus familiaris keratin 5, type II	27	Identical	Identical	XM_003433511.2	NM_001346035.1	Different (stop 6bp)	ENSCAFT00000011623.4	Different (stop 6bp)	y	y
LOC486523	486523	KRT6A	Canis lupus familiaris keratin 6A	27	Identical	Identical	XM_005636794.1	XM_005636794.1	Different (start 3bp)	ENSCAFT00000011630.2	Different (start 3bp)	y	y
LOC100687987	100687987	KRT6B	Canis lupus familiaris keratin 6B	27	Identical	Identical	XM_003433512.2	XM_003433512.2	Different (start 3bp)	ENSCAFT00000011636.3	Different (start 3bp)	y	y
KRT7	477602	KRT7	Canis lupus familiaris keratin 7	27	Identical	Identical	XM_005636798.1	XM_005636798.1	Different (start, first exon)	ENSCAFT00000011720.3	Different (start, first exon)	y	y
KRT8	486513	KRT8	Canis lupus familiaris keratin 8	27	Identical	Identical	XM_543639.5	NM_001346039.1	Different (exon 8)	ENSCAFT00000011536.3	Different (exon 8)	y	y
KRT18	477601	KRT18	Canis lupus familiaris keratin 18	27	Identical	Identical	XM_534794.4	NM_001346040.1	Different (start, first exon)	ENSCAFT00000011515.3	Different (start, first exon)	y	y
KRT76	486518	KRT76	Canis lupus familiaris keratin 76	27	Different	Identical	NM_001014277.1	NM_001346020.1	Different (last exon split in Ensemble)	ENSCAFT00000039433.2	Different (last exon split in Ensemble)	y	y
LOC100683333	100683333	KRT77	Canis lupus familiaris keratin, type II cytoskeletal 1b	27	Different	Different	XM_005637413.1	XM_005637413.1	Different	ENSCAFT00000048256.1	Different (number of exons)	y	n (gap in the last exon containing the 3'-end of the coding sequence).
KRT78	486514	KRT78	Canis lupus familiaris keratin 78, type II	27	Identical	Identical	XM_543640.3	XM_543640.3	Identical	ENSCAFT00000039436.2	Identical	y	y
KRT79	486515	KRT79	Canis lupus familiaris keratin 79	27	Identical	Identical	XM_543641.3	NM_001346042.1	Identical	ENSCAFT00000011544.3	Identical	y	y
KRT80	486534	KRT80	Canis lupus familiaris keratin 80	27	Identical	Identical	XM_543660.3	XM_543660.4	Identical	ENSCAFT00000011729.3	Identical	y	y
KRT71	486522	KRT71	Canis lupus familiaris keratin 71, type II	27	Identical	Identical	NM_001197029.1	NM_001197029.1	Identical	ENSCAFT00000011649.3	Identical	y	y
KRT72	486520	KRT72	Canis lupus familiaris keratin 72, type II	27	Identical	Identical	XM_543646.3	XM_543646.3	Different (exon 3)	ENSCAFT00000011555.3	Different (exon 3)	y	y
LOC608027	608027	KRT73	Canis lupus familiaris keratin, type II cytoskeletal 73	27	Identical	Identical	XM_005636790.1	XM_005636790.1	Different (stop)	ENSCAFT00000011593.4	Different (stop)	y	y
KRT74	486521	KRT74	Canis lupus familiaris keratin 74, type II	27	Identical	Identical	XM_543647.4	XM_543647.4	Different (exon 6)	ENSCAFT00000039348.2	Different (exon 6)	y	y
LOC100683813	100683813	KRT75	Canis lupus familiaris keratin 75	27	Different	Identical	XM_003433503.2	XM_003433503.3	Different (start 3bp)	ENSCAFT00000011617.3	Different (start 3bp)	y	y
LOC486531	486531	KRT81	Canis lupus familiaris keratin 81	27	Identical	Identical	XM_543657.4	XM_543657.5	Identical	ENSCAFT00000011707.3	Identical	y	y
KRT82	486525	KRT82	Canis lupus familiaris keratin 82, type II	27	Identical	Identical	XM_543651.3	XM_543651.3	Identical	ENSCAFT00000011652.4	Identical	y	y
LOC486529	486529	KRT83	Canis lupus familiaris keratin, type II microfibrillar, component 7C	27	Identical	Identical	XM_845073.3	XM_845073.3	Identical	ENSCAFT00000011685.3	Identical	y	y
KRT84	486526	KRT84	Canis lupus familiaris keratin 84, type II	27	Identical (low coverage)	Identical (low coverage)	XM_543652.2	XM_543652.2	Identical (low coverage)	ENSCAFT00000011656.2	Identical	n	y (identical to NCBI & ENSEMBL)
LOC486527	486527	KRT85	Canis lupus familiaris keratin, type II cuticular Hb5	27	Identical	Identical	XM_543653.4	NM_001346052.1	Different (stop)	ENSCAFT00000011662.3	Different (stop)	y	y
LOC486530	486530	KRT86	Canis lupus familiaris keratin 86	27	Identical	Identical	XM_543656.4	XM_543656.5	Identical	ENSCAFT00000011692.3	Identical	y	y
KRT9	490980	KRT9	Canis lupus familiaris keratin 9	9	Different	Different	NM_001014285.1	XM_014116481.1	Different (number of Exons, exons 7-8)	ENSCAFT00000025275.3	Different (number of exons)	y	y
KRT10	491006	KRT10	Canis lupus familiaris keratin 10	9	Identical	Identical	NM_001013425.1	XM_014116590.1	Identical	ENSCAFT00000025391.3	Identical	y	y
KRT12	100034663	KRT12	Canis lupus familiaris keratin 12, type I	9	Identical	Identical	NM_001082421.1	NM_001082421.1	Different (exon 5)	ENSCAFT00000025387.3	Different (exon 5)	y	y
LOC490983	490983	KRT13	Canis lupus familiaris keratin, type I cytoskeletal 13	9	Identical (low coverage)	Identical (low coverage)	XM_548106.4	NM_001346369.1	Different (exon 7, low coverage)	ENSCAFT00000045221.1	Different (exon 7)	n	y (identical to NCBI & ENSEMBL)
KRT14	100685323	KRT14	Canis lupus familiaris keratin 14	9	Identical	Identical	NM_001253741.1	NM_001253741.1	Identical	ENSCAFT00000025254.3	Identical	y	y
KRT15	100685404	KRT15	Canis lupus familiaris keratin 15	9	Identical	Identical	NM_001253744.1	NM_001253744.1 (2 variants)	Identical	ENSCAFT00000045014.2	Identical	y	y
KRT16	490978	KRT16	Canis lupus familiaris keratin, type I cytoskeletal 16	9	Identical	Identical	XM_548101.3	XM_548101.3	NA	No Ensembl transcript	NA	y	y
KRT17	490977	KRT17	Canis lupus familiaris keratin 17	9	Identical	Identical	XM_548100.4	XM_548100.4	Identical	ENSCAFT00000025255.3	Identical	y	y
KRT19	100685481	KRT19	Canis lupus familiaris keratin 19, type I	9	Identical	Identical	NM_001253742.1	NM_001253742.1	Identical	ENSCAFT00000025270.3	Identical	y	y
KRT20	608094	KRT20	Canis lupus familiaris keratin 20	9	Identical (low coverage)	Identical (low coverage)	XM_844998.2	XM_844998.3	Different (exon 7, low coverage)	ENSCAFT00000038760.1	Different (Exon 7)	n	y (identical to NCBI)
KRT23	491005	KRT23	Canis lupus familiaris keratin 23	9	Identical	Identical	XM_005624524.1	NM_001346058.1	Identical	ENSCAFT00000025377.3	Identical	y	y
KRT24	491009	KRT24	Canis lupus familiaris keratin 24	9	Identical	Identical	XM_548129.4	XM_548129.5	Identical	ENSCAFT00000025407.3	Identical	y	y
KRT25	100686957	KRT25	Canis lupus familiaris keratin 25	9	Identical	Identical	XM_003435247.2	NM_001346065.1	Identical	ENSCAFT00000025259.4	Identical	y	y
KRT26	491008	KRT26	Canis lupus familiaris keratin 26, type I	9	Identical	Identical	XM_548128.3	NM_001346066.1	Identical	ENSCAFT00000025404.2	Identical	y	y
KRT27	491007	KRT27	Canis lupus familiaris keratin 27	9	Identical	Identical	XM_548127.2	NM_001346069.1	Different (start)	ENSCAFT00000025399.3	Different (start)	y	y
KRT28	608107	KRT28	Canis lupus familiaris keratin 28	9	Identical	Identical	XM_845013.3	NM_001346072.1	Different (span, exon number and position)	ENSCAFT00000025394.3	Different (span, exon number and position)	y	y
LOC490988	490988	KRT31	Canis lupus familiaris keratin 31	9	Identical	Identical	XM_005624490.1	XM_005624490.2	Identical	ENSCAFT00000025319.2	Identical	y	y
KRT32	490985	KRT32	Canis lupus familiaris keratin 32, type I	9	Identical	Identical	XM_548108.3	XM_548108.3	Identical	ENSCAFT00000025281.2	Identical	y	y
KRT33A	490991	KRT33A	Canis lupus familiaris keratin 33A, type I	9	Identical	Identical	XM_005624492.1	NM_001346094.1	Identical	ENSCAFT00000025351.2	Identical	y	y
LOC607876	607876	KRT33B	Canis lupus familiaris keratin, type I cuticular Ha3-II	9	Identical	Identical	XM_005624491.1	NM_001346095.1	Different (Exon 2 and 3)	ENSCAFT00000025317.2	Different (exons 2 and 3)	y	y
LOC490989	490989	KRT34	Canis lupus familiaris keratin, type I cuticular Ha1	9	Identical	Identical	XM_548112.4	XM_548112.4	Different (start, stop)	ENSCAFT00000025346.3	Different (start, stop)	y	y
KRT35	607814	KRT35	Canis lupus familiaris keratin 35	9	Identical	Identical	XM_844621.2	XM_844621.3	Different (stop 3bp; stop codon missing in Ensembl)	ENSCAFT00000025278.4	Different (stop 3bp; stop codon missing in Ensembl)	y	y
KRT36	490984	KRT36	Canis lupus familiaris keratin 36, type I	9	Identical	Identical	XM_548107.3	XM_548107.3	Different (stop)	ENSCAFT00000025269.3	Different (stop)	y	y
KRT37	607848	KRT41	Canis lupus familiaris keratin 37	9	Identical	Identical	XM_844677.3	XM_844677.3	Different (stop)	ENSCAFT00000025331.2	Different (stop)	y	y
KRT38	490986	KRT38	Canis lupus familiaris keratin 38, type I	9	Identical	Identical	XM_548109.4	XM_548109.4	Different (stop)	ENSCAFT00000025284.3	Different (stop)	y	y
KRT39	491004	KRT39	Canis lupus familiaris keratin 39	9	Identical	Identical	XM_548124.3	XM_548124.4	Identical	ENSCAFT00000035688.2	Identical	y	y
KRT40	608072	KRT40	Canis lupus familiaris keratin 40	9	Identical	Identical	XM_844965.2	NM_001346099.1	Different (stop)	ENSCAFT00000025367.3	Different (stop)	y	y
KRT222	100687121	KRT222	Canis lupus familiaris keratin 222	9	Identical	Identical	XM_003435248.3	NM_001346101.1	Identical	ENSCAFT00000047162.1	Identical	y	y
KRT42	490976	KRT42	Canis lupus familiaris keratin 42	9	Identical (differs in 5'-UTR)	Identical (differs in 5'-UTR)	XM_548099.3	XM_548099.3	Different (5'-UTR, start, exons 1 and 2)	ENSCAFT00000025265.2	Different (start, exons 1 and 2)	y	y
LOC608165	608165	KRT88	keratin, type II cytoskeletal 8-like	27	Identical (low coverage)	Different (low coverage)	XM_005636797.1	XM_014108366.1	Too low coverage	ENSCAFT00000011710.3	Different (number of exons)	n	y (low confidence)
LOC486528	486528	KRT89	Canis lupus familiaris keratin, type II cuticular Hb5-like	27	Identical	Identical	XM_543654.4	XM_543654.4	NA	ENSCAFT00000011672.3	Different (start, stop)	y	y
LOC486533	486533	KRT87P	keratin, type II cuticular Hb1-like	27	NA	NA	No RefSeq transcript	No RefSeq transcript	NA	ENSCAFT00000011670.3	NA	n	n (pseudogene)
LOC486524	486524	KRT124	Canis lupus familiaris keratin 75-like	27	Identical (low coverage)	Identical (low coverage)	XM_543650.4	XM_543650.4	NA	No Ensembl transcript	NA	n	y (identical to NCBI)
LOC100683250	100683250	KRT126	Canis lupus familiaris keratin, type II cytoskeletal 3-like	27	Different	Different	XM_005637412.1	XM_005637412.1	NA	No Ensembl transcript	NA	y	y
LOC490987	490987	KRT37	Canis lupus familiaris keratin, type I cuticular Ha8	9	Identical	Identical	XM_548110.3	XM_548110.3	NA	No Ensembl transcript	NA	y	y

## Sheet: horse_cleaned_version
S1 Table. Compilation of existing RefSeqs for canine and equine keratin genes.
Horse
old NCBI gene symbol (annotation release 101)	GeneID	Current NCBI gene symbol (annotation release 102)	Description	Chromosome	Curated vs. RefSeq (annotation release 101)	Curated vs. RefSeq (annotation release 102)	RefSeq Accession (annotation release 101)	Updated RefSeq Accession (annotation release 102)	Curated vs. Ensembl (87)	Ensembl transcript ID (87)	RefSeq and Ensembl (87)	RNA-seq read coverage ok (y/n)	Curated mRNA sequence provided (y/n; File S2)
KRT1	100063302	KRT1	Equus caballus keratin 1	6	Identical	Identical	XM_001494579.4	NM_001346199.1	Different (exon 1 and 9)	ENSECAT00000024023.1	Different (exon 1 and 9)	y	y
KRT2	100063215	KRT2A	Equus caballus keratin, type II cytoskeletal 2 epidermal-like	6	Identical (low coverage)	Identical (low coverage)	XM_001504438.2	XM_001504438.3	Different (number of exons, low coverage)	ENSECAT00000018830.1	Different (number of exons)	n	y (identical to NCBI)
KRT3	100061828	KRT3	Equus caballus similar to keratin 3	6	Identical (low coverage)	Identical (low coverage)	XM_001504470.2	XM_001504470.3	Different (first exon split, low coverage)	ENSECAT00000012516.1	Different (first exon split)	n	y (identical to NCBI)
KRT4	100061857	KRT4	Equus caballus keratin 4	6	Identical (low coverage)	Identical (low coverage)	XM_001504474.2	NM_001346204.2	Different (exon 7, 8, stop, low coverage)	ENSECAT00000019537.1	Different (exon 7, 8, stop)	n	y (identical to NCBI)
KRT5	100061626	KRT5	Equus caballus keratin 5	6	Identical	Identical	XM_001504418.4	NM_001346208.1	Identical	ENSECAT00000021837.1	Identical	y	y
LOC100061595	100061595	KRT6A	Equus caballus keratin 6A	6	Identical	Identical	XM_001504413.3	NM_001346209.1	Different (exons 9 and 10)	ENSECAT00000018371.1	Different (exons 9 and 10)	y	y
KRT7	100062790	KRT7	Equus caballus keratin 7	6	Identical	Identical	XM_001504375.2	NM_001346212.1	Different (number of exons, stop)	ENSECAT00000021817.1	Different (number of exons, stop)	y	y
KRT8	100063511	KRT8	Equus caballus keratin 8	6	Different (exon 6 and 7)	Different (exon 6 and 7)	XM_005614767.1	XM_005614767.2	Different (number and position of exons)	ENSECAT00000023440.1	Different (number and position of exons)	y	y
KRT18	100063542	KRT18	Equus caballus keratin 18	6	Different	Different	XM_005614771.1	XM_005614771.2	Different (location of gene, number of exons)	ENSECAT00000000740.1	Different (location of gene, number of exons)	y	y
KRT76	100063410	KRT76	Equus caballus keratin, type II cytoskeletal 2 oral-like	6	Identical (low coverage)	Identical (low coverage)	XM_001494641.2	NM_001346241.1	Too low coverage	ENSECAT00000011429.1	Identical	n	y (identical to NCBI & ENSEMBL)
KRT77	100061792	KRT77	Equus caballus keratin 77	6	Identical	Identical	XM_001504457.1	XM_001504457.2	Different (exon 9 split)	ENSECAT00000008989.1	Different (exon 9 split)	y	y
KRT78	100147555	KRT78	Equus caballus keratin 78	6	Different	Different	XM_001916090.2	XM_014740785.1	Different (gap sequenced)	ENSECAT00000023303.1	Different (number and position of exons)	y	y
KRT79	100061886	KRT79	Equus caballus keratin 79	6	Identical	Identical	XM_001504477.1	NM_001346237.1	Identical	ENSECAT00000023049.1	Identical	y	y
KRT80	100061386	KRT80	Equus caballus keratin 80	6	Identical	Identical	XM_001504373.2	NM_001346221.1	Different (start 3bp)	ENSECAT00000020408.1	Different (start 3bp)	y	y
KRT71	100061657	KRT71	Equus caballus keratin 71	6	Identical	Identical	XM_005611211.1	NM_001346219.1	Identical	ENSECAT00000004175.1	Identical	y	y
LOC100061693	100061693	KRT72	Equus caballus keratin 72	6	Identical	Identical	XM_001504432.3	XM_001504432.4	Different (number of exons)	ENSECAT00000012629.1	Different (number of exons)	y	y
LOC100061725	100061725	KRT73	Equus caballus keratin 73	6	Identical	Identical	XM_001504434.3	XM_001504434.4	Identical	ENSECAT00000015143.1	Identical	y	y
LOC102150169	102150169	KRT74	Equus caballus keratin, type II cytoskeletal 74	6	Too low coverage	Too low coverage	XM_005614775.1	XM_005614775.1	NA	No Ensembl transcript	NA	n	n (existing annotation not well conserved with human; insufficient RNA-seq support)
LOC100061487	100061487	KRT75	Equus caballus keratin 75	6	Identical	Identical	XM_001504398.2	NM_001346217.1	Identical	ENSECAT00000010644.1	Identical	y	y
LOC100062930	100062930	KRT81	Equus caballus similar to hair type II keratin intermediate filament protein	6	Identical	Identical	XM_001504383.1	NM_001346216.1	Identical	ENSECAT00000005437.1	Identical	y	y
KRT82	100063050	KRT82	Equus caballus similar to type II hair keratin	6	Identical	Identical	XM_001494430.2	NM_001346213.1	Identical	ENSECAT00000007903.1	Identical	y	y
LOC100146665	100146665	KRT83	Equus caballus similar to Keratin, type II microfibrillar, component 7C	6	Identical	Identical	XM_001916214.1	NM_001346211.1	Identical	ENSECAT00000016888.1	Identical	y	y
KRT84	100061422	KRT84	Equus caballus keratin, type II cuticular Hb4-like	6	Identical	Identical	XM_001504395.2	NM_001346210.1	Identical	ENSECAT00000002408.1	Identical	y	y
LOC100062985	100062985	KRT85	Equus caballus keratin 85	6	Different	Different	XM_001494377.2	XM_014741017.1	Different (gap sequenced)	ENSECAT00000025120.1	Different (number of exons)	y	y
LOC100062959	100062959	KRT86	Equus caballus keratin, type II cuticular Hb6-like	6	Identical	Identical	XM_005611208.1	NM_001346200.1	Identical	ENSECAT00000010094.1	Identical	y	y
KRT9	102148895	KRT9P	Equus caballus keratin 9	11	Too low coverage/Gap	Too low coverage/Gap	XM_005614759.1	XM_014736779.1 (pseudo)	NA	No Ensembl transcript	NA	n	n (pseudogene in horse)
KRT10	100146924	KRT10A	Equus caballus keratin, type I cytoskeletal 10-like	11	Identical	Identical	XM_005597422.1	NM_001346076.1	Different (number of exons)	ENSECAT00000026612.1	Different (number of exons)	y	y
KRT12	100067513	KRT12	Equus caballus keratin 12	11	Identical (low coverage)	Identical (low coverage)	XM_005597423.1	XM_005597423.2	Different (gap sequenced)	ENSECAT00000020189.1	Different (exon 3 split)	n	y (low confidence prediction; we corrected a sequencing error in the genome reference)
LOC100066675	100066675	KRT13	Equus caballus keratin 13	11	Different	Identical	XM_005597408.1	XM_005597408.2	Different (number of exons)	ENSECAT00000018461.1	Different (number of exons)	y	y
LOC100053489	100053489	KRT14	Equus caballus keratin 14	11	Identical	Identical	XM_001496937.2	NM_001346198.1	Different (exon 1 split, start)	ENSECAT00000012078.1	Different (exon 1 split, start)	y	y
KRT15	100066653	KRT15	Equus caballus keratin 15	11	Identical	Identical	XM_005597407.1	XM_005597407.2	Different (number and position of exons)	ENSECAT00000018461.1	Different (number and position of exons)	y	y
LOC100066610	100066610	KRT16	Equus caballus keratin 16	11	Different	Different	XM_005597406.1	XM_005597406.2	Different	ENSECAT00000006418.1	Different (first exon split, stop)	y	y
KRT17	100053436	KRT17	Equus caballus keratin 17	11	Identical	Identical	XM_001496441.3	NM_001346193.1	Identical	ENSECAT00000017456.1	Identical	y	y
KRT19	100147127	KRT19	Equus caballus keratin 19	11	Identical	Identical	XM_001917408.2	XM_001917408.3	Different (stop)	ENSECAT00000014901.1	Different (stop)	y	y
KRT20	100053884	KRT20	Equus caballus keratin 20	11	Different (low coverage)	Different (low coverage)	XM_005597424.1	XM_005597424.2	Different	ENSECAT00000029099.1	Different (exons 6 and 7, stop)	n	y (low confidence prediction; our curated sequence conforms to the genome reference and lacks 3 nucleotides encoded by exon 6 in comparison to XM_005597424.1)
KRT23	100067426	KRT23	Equus caballus keratin 23	11	Identical	Identical	XM_005597425.1	NM_001346192.1	Different (exon 1 split)	ENSECAT00000015650.1	Different (exon 1 split)	y	y
KRT24	100067626	KRT24	Equus caballus keratin 24	11	Identical (low coverage)	Identical (low coverage)	XM_001500068.3	NM_001346191.1	Identical( low coverage)	ENSECAT00000017164.1	Identical	n	y (identical to NCBI & ENSEMBL)
KRT25	100054031	KRT25	Equus caballus keratin 25	11	Identical	Identical	XM_001500038.3	NM_001346190.1	Identical	ENSECAT00000014491.1	Identical	y	y
LOC100067606	100067606	KRT26	Equus caballus similar to Keratin, type I cytoskeletal 26	11	Identical	Identical	XM_001497602.1	NM_001346190.1	Identical	ENSECAT00000013369.1	Identical	y	y
KRT27	100053988	KRT27	Equus caballus keratin, type I cytoskeletal 27-like	11	Identical	Identical	XM_001499972.1	NM_001346176.1	Different (first exon split)	ENSECAT00000011556.1	Different (first exon split)	y	y
LOC100067557	100067557	KRT28	Equus caballus keratin 28	11	Identical	Identical	XM_001917509.2	NM_001346174.1	Identical	ENSECAT00000010088.1	Identical	y	y
LOC100066836	100066836	KRT31	Equus caballus keratin 31	11	Identical	Identical	XM_005597409.1	NM_001346172.1	Different (start 6bp)	ENSECAT00000016538.1	Different (start 6bp)	y	y
KRT32	100066752	KRT32	Equus caballus keratin 32	11	Identical	Identical	XM_005597917.1	XM_005597917.2	Different (start)	ENSECAT00000011868.1	Different (start)	y	y
LOC100066898	100066898	KRT33A	Equus caballus keratin 33A	11	Identical	Identical	XM_005597411.1	NM_001346165.1	Different (start)	ENSECAT00000016384.1	Different (start)	y	y
LOC100066876	100066876	KRT33B	Equus caballus keratin, type I cuticular Ha3-I-like	11	Identical	Identical	XM_005597410.1	NM_001346161.1	Identical	ENSECAT00000014215.1	Identical	y	y
LOC100066856	100066856	KRT34	Equus caballus keratin, type I cuticular Ha4-like	11	Different (start)	Identical	XM_001917422.1	NM_001346182.1	Identical	ENSECAT00000003236.1	Identical	y	y
KRT35	100066728	KRT35	Equus caballus similar to keratin 35	11	Identical	Identical	XM_001497683.1	NM_001346159.1	Identical	ENSECAT00000009217.1	Identical	y	y
KRT36	100066701	KRT36	Equus caballus keratin 36	11	Identical (low coverage)	Identical (low coverage)	XM_001496895.2	NM_001346185.1	Identical (low coverage)	ENSECAT00000005479.1	Identical	n	y (low confidence prediction, different 5'-UTR and 3'-UTR compared to XM_001496895.2)
LOC100066792	100066792	KRT37	Equus caballus keratin 37	11	Identical (low coverage)	Identical (low coverage)	XM_001496970.1	XM_001496970.2	Different (stop, low coverage)	ENSECAT00000013480.1	Different (stop)	n	y (low confidence prediction, different 5'-UTR and 3'-UTR compared to XM_001496970.1)
LOC100066813	100066813	KRT41P*	keratin, type I cuticular Ha7	11	Different (splice site exon 1)	Different (splice site exon 1)	XM_001496988.1	XM_001496988.2	Different (start, stop, splice site exon 1)	ENSECAT00000015098.1	Different (start, stop)	y	n (horse has no KRT38 ortholog; LOC100066813 corresponds to KRT41)
KRT39	100067401	KRT39	Equus caballus keratin 39	11	Identical	Identical	XM_001497466.1	NM_001346158.1	Different (exon 1 split)	ENSECAT00000013426.1	Different (exon 1 split)	y	y
KRT40	100067378	KRT40	Equus caballus keratin 40	11	Identical	Identical	XM_001499493.3	XM_001499493.4	Identical	ENSECAT00000011039.1	Identical	y	y
LOC100066586	100066586	KRT42	Equus caballus keratin, type I cytoskeletal 42-like	11	Identical	Identical	XM_001496811.2	XM_014736774.1	Different (start 6bp)	ENSECAT00000016624.1	Different (start 6bp)	y	y
KRT222	100054077	KRT222	Equus caballus keratin 222	11	Identical	Identical	XM_001500146.2	XM_001500146.3	Different (stop 3bp; stop codon missing in Ensembl)	ENSECAT00000029014.1	Different (stop 3bp; stop codon missing in Ensembl)	y	y
LOC100053935	100053935	KRT10B	Equus caballus keratin, type I cytoskeletal 10-like	11	Identical	Identical	XM_001499804.4	XM_001499804.5	Different(start, stop, number of exons)	ENSECAT00000021831.1	Different(start, stop, number of exons)	y	y
LOC100062875	100062875	KRT88	Equus caballus similar to intermediate filament type II keratin	6	Identical (low coverage)	Identical (low coverage)	XM_001494298.2	XM_001494298.3	Different (start, stop)	ENSECAT00000026859.1	Different (start, stop)	n	y (low confidence prediction, different 5'-UTR and 3'-UTR compared to XM_001494298.2)
LOC102149928	102149928	KRT129P*	Equus caballus keratin, type II cuticular Hb6-like	6	NA	NA	XM_005611397.1	XM_014740780.1	NA	ENSECAT00000002277.1	NA	n	n (pseudogene)
LOC100061458	100061458	KRT124	Equus caballus keratin, type II cytoskeletal 5-like	6	Too low coverage	Too low coverage	XM_001504397.3	XM_001504397.3	Too low coverage	ENSECAT00000008178.1	Different (start, exon 1 split)	n	y (low confidence prediction, different 5'-UTR compared to XM_001504397.3)
LOC100146362	100146362	KRT89	keratin, type II cuticular Hb5-like	6	NA	identical (low coverage)	No RefSeq transcript	XM_014741016.1	Different (correction in exon 6; low coverage)	ENSECAT00000024893.1	Different (correction in exon 6)	n	y (low confidence prediction; we corrected a sequencing error in the genome reference)
LOC102150124	102150124	KRT6P	keratin, type II cytoskeletal 6A-like	6	NA	NA	No RefSeq transcript	No RefSeq transcript	NA	ENSECAT00000014012.1, ENSECAT00000014022.1	NA	n	n
LOC100061525	100061525	KRT6C	Equus caballus keratin, type II cytoskeletal 6A-like	6	Identical	Identical	XM_001504406.4	NM_001346138.1	Identical	ENSECAT00000014232.1	Identical	y	y
LOC100061560	100061560	KRT6B	Equus caballus keratin, type II cytoskeletal 6A-like	6	Identical	Identical	XM_001504410.3	NM_001346137.1	Identical	ENSECAT00000015690.1	Identical	y	y
LOC100063179	100063179	KRT128	Equus caballus keratin 2	6	Different(exon 10, stop; low coverage)	Different(exon 10, stop; low coverage)	XM_001494503.3	XM_014740781.1	NA	No Ensembl transcript	NA	n	y (low confidence prediction based on NCBI annotation release 101)
LOC100061764	100061764	KRT2B	Equus caballus keratin, type II cytoskeletal 2 epidermal-like	6	Identical	Identical	XM_001504446.3	XM_001504446.4	Identical	ENSECAT00000019612.1	Identical	y	y
LOC100146152	100146152	KRT2C	Equus caballus keratin, type II cytoskeletal 2 epidermal-like	6	Gap	Gap	XM_005611398.1	XM_014740782.1	NA	ENSECAT00000024023.1	Different(number and position of exons)	y (gap)	y (gap in the genome reference, curated mRNA sequence contains 534 Ns)
LOC100063342	100063342	KRT126P	keratin, type II cytoskeletal 3-like	6	NA	NA	No RefSeq transcript	XM_014740783.1 (pseudo)	NA	ENSECAT00000011319.1	Different (start, number of exons)	n	n (pseudogene)
LOC102149880	102149880	KRT87P	keratin, type II microfibrillar, component 7C-like	6	NA	NA	No RefSeq transcript	XM_014740779.1 (pseudo)	NA	ENSECAT00000026230.1	Different (number and positions of exons)	n	n (pseudogene)
