# Supplementary material for: A curated catalog of canine and equine keratin genes
Source: PLoS One. 2017 Aug 28;12(8):e0180359. doi: 10.1371/journal.pone.0180359 (PMC5573215; doi:10.1371/journal.pone.0180359)
Supplement: S2 Table — (XLSX) [file pone.0180359.s008.xlsx]

## Sheet: sheet1
S2 Table. Comparative curated annotation of human, canine and equine keratin genes. Red shading indicates a low reliability of the annotation due to low RNA-seq coverage and/or errors/gaps in the genome reference assembly.
Gene symbol			Human GRCh38.p2 (Annotation release 107, NCBI)								CanFam3.1							EquCab2.0
KRT1	Feature	Feature #	Human Chr	Human Start	Human Stop	Size	Orientation	Human Accession	Feature	Feature #	Dog Chr	Dog Start	Dog Stop	Size	Orientation	Feature	Feature #	Horse Chr	Horse Start	Horse Stop	Size	Orientation	Comments
	Exon	1 UTR	NC_000012.12	52680349	52680407	59	minus	NM_006121.3	Exon	1 UTR	NC_006609.3	2422101	2422149	49	plus	Exon	1 UTR	NC_009149.2	69796435	69796483	49	minus
	Exon	1 CDS	NC_000012.12	52679758	52680348	591	minus		Exon	1 CDS	NC_006609.3	2422150	2422743	594	plus	Exon	1 CDS	NC_009149.2	69795811	69796434	624	minus
	Intron	1	NC_000012.12	52678757	52679757	1001	minus		Intron	1	NC_006609.3	2422744	2423778	1035	plus	Intron	1	NC_009149.2	69794748	69795810	1063	minus
	Exon	2	NC_000012.12	52678542	52678756	215	minus		Exon	2	NC_006609.3	2423779	2423993	215	plus	Exon	2	NC_009149.2	69794533	69794747	215	minus
	Intron	2	NC_000012.12	52678224	52678541	318	minus		Intron	2	NC_006609.3	2423994	2424326	333	plus	Intron	2	NC_009149.2	69794215	69794532	318	minus
	Exon	3	NC_000012.12	52678163	52678223	61	minus		Exon	3	NC_006609.3	2424327	2424387	61	plus	Exon	3	NC_009149.2	69794154	69794214	61	minus
	Intron	3	NC_000012.12	52677746	52678162	417	minus		Intron	3	NC_006609.3	2424388	2424804	417	plus	Intron	3	NC_009149.2	69793739	69794153	415	minus
	Exon	4	NC_000012.12	52677650	52677745	96	minus		Exon	4	NC_006609.3	2424805	2424900	96	plus	Exon	4	NC_009149.2	69793643	69793738	96	minus
	Intron	4	NC_000012.12	52677481	52677649	169	minus		Intron	4	NC_006609.3	2424901	2425069	169	plus	Intron	4	NC_009149.2	69793475	69793642	168	minus
	Exon	5	NC_000012.12	52677316	52677480	165	minus		Exon	5	NC_006609.3	2425070	2425234	165	plus	Exon	5	NC_009149.2	69793310	69793474	165	minus
	Intron	5	NC_000012.12	52677185	52677315	131	minus		Intron	5	NC_006609.3	2425235	2425364	130	plus	Intron	5	NC_009149.2	69793156	69793309	154	minus
	Exon	6	NC_000012.12	52677059	52677184	126	minus		Exon	6	NC_006609.3	2425365	2425490	126	plus	Exon	6	NC_009149.2	69793030	69793155	126	minus
	Intron	6	NC_000012.12	52676496	52677058	563	minus		Intron	6	NC_006609.3	2425491	2426010	520	plus	Intron	6	NC_009149.2	69792548	69793029	482	minus
	Exon	7	NC_000012.12	52676275	52676495	221	minus		Exon	7	NC_006609.3	2426011	2426231	221	plus	Exon	7	NC_009149.2	69792327	69792547	221	minus
	Intron	7	NC_000012.12	52675745	52676274	530	minus		Intron	7	NC_006609.3	2426232	2426687	456	plus	Intron	7	NC_009149.2	69791790	69792326	537	minus
	Exon	8	NC_000012.12	52675710	52675744	35	minus		Exon	8	NC_006609.3	2426688	2426722	35	plus	Exon	8	NC_009149.2	69791755	69791789	35	minus
	Intron	8	NC_000012.12	52675618	52675709	92	minus		Intron	8	NC_006609.3	2426723	2426813	91	plus	Intron	8	NC_009149.2	69791669	69791754	86	minus
	Exon	9 CDS	NC_000012.12	52675193	52675617	425	minus		Exon	9 CDS	NC_006609.3	2426814	2427160	347	plus	Exon	9 CDS	NC_009149.2	69791331	69791668	338	minus
	Exon	9 UTR	NC_000012.12	52674736	52675192	457	minus		Exon	9 UTR	NC_006609.3	2427161	2427628	468	plus	Exon	9 UTR	NC_009149.2	69790848	69791330	483	minus
	Total size (bp)					5672			Total size (bp)					5528		Total size (bp)					5636
	Number of amino acids					644			Number of amino acids					619		Number of amino acids					626
KRT2 / KRT2A	Feature	Feature #	Human Chr	Human Start	Human Stop	Size	Orientation	Human Accession	Feature	Feature #	Dog Chr	Dog Start	Dog Stop	Size	Orientation	Feature	Feature #	Horse Chr	Horse Start	Horse Stop	Size	Orientation
	Exon	1 UTR	NC_000012.12	52652143	52652175	33	minus	NM_000423.2	Exon	1 UTR	NC_006609.3	2447795	2447853	59	plus	Exon	1 UTR	NC_009149.2	69740420	69740463	44	minus
	Exon	1 CDS	NC_000012.12	52651558	52652142	585	minus		Exon	1 CDS	NC_006609.3	2447854	2448480	627	plus	Exon	1 CDS	NC_009149.2	69739808	69740419	612	minus
	Intron	1	NC_000012.12	52650554	52651557	1004	minus		Intron	1	NC_006609.3	2448481	2449452	972	plus	Intron	1	NC_009149.2	69738807	69739807	1001	minus
	Exon	2	NC_000012.12	52650339	52650553	215	minus		Exon	2	NC_006609.3	2449453	2449667	215	plus	Exon	2	NC_009149.2	69738592	69738806	215	minus
	Intron	2	NC_000012.12	52649975	52650338	364	minus		Intron	2	NC_006609.3	2449668	2450013	346	plus	Intron	2	NC_009149.2	69738244	69738591	348	minus
	Exon	3	NC_000012.12	52649914	52649974	61	minus		Exon	3	NC_006609.3	2450014	2450074	61	plus	Exon	3	NC_009149.2	69738183	69738243	61	minus
	Intron	3	NC_000012.12	52649103	52649913	811	minus		Intron	3	NC_006609.3	2450075	2450887	813	plus	Intron	3	NC_009149.2	69737064	69738182	1119	minus
	Exon	4	NC_000012.12	52649007	52649102	96	minus		Exon	4	NC_006609.3	2450888	2450983	96	plus	Exon	4	NC_009149.2	69736968	69737063	96	minus
	Intron	4	NC_000012.12	52648338	52649006	669	minus		Intron	4	NC_006609.3	2450984	2451638	655	plus	Intron	4	NC_009149.2	69736340	69736967	628	minus
	Exon	5	NC_000012.12	52648173	52648337	165	minus		Exon	5	NC_006609.3	2451639	2451803	165	plus	Exon	5	NC_009149.2	69736175	69736339	165	minus
	Intron	5	NC_000012.12	52647856	52648172	317	minus		Intron	5	NC_006609.3	2451804	2452107	304	plus	Intron	5	NC_009149.2	69735850	69736174	325	minus
	Exon	6	NC_000012.12	52647730	52647855	126	minus		Exon	6	NC_006609.3	2452108	2452233	126	plus	Exon	6	NC_009149.2	69735724	69735849	126	minus
	Intron	6	NC_000012.12	52646961	52647729	769	minus		Intron	6	NC_006609.3	2452234	2452578	345	plus	Intron	6	NC_009149.2	69735111	69735723	613	minus
	Exon	7	NC_000012.12	52646740	52646960	221	minus		Exon	7	NC_006609.3	2452579	2452799	221	plus	Exon	7	NC_009149.2	69734890	69735110	221	minus
	Intron	7	NC_000012.12	52645570	52646739	1170	minus		Intron	7	NC_006609.3	2452800	2453997	1198	plus	Intron	7	NC_009149.2	69733768	69734889	1122	minus
	Exon	8	NC_000012.12	52645535	52645569	35	minus		Exon	8	NC_006609.3	2453998	2454032	35	plus	Exon	8	NC_009149.2	69733733	69733767	35	minus
	Intron	8	NC_000012.12	52645435	52645534	100	minus		Intron	8	NC_006609.3	2454033	2454130	98	plus	Intron	8	NC_009149.2	69733634	69733732	99	minus
	Exon	9 CDS	NC_000012.12	52645019	52645434	416	minus		Exon	9 CDS	NC_006609.3	2454131	2454492	362	plus	Exon	9 CDS	NC_009149.2	69733275	69733633	359	minus
	Exon	9 UTR	NC_000012.12	52644558	52645018	461	minus		Exon	9 UTR	NC_006609.3	2454493	2454927	435	plus	Exon	9 UTR	NC_009149.2	69732860	69733274	415	minus
	Total size (bp)					7618			Total size (bp)					7133		Total size (bp)					7604
	Number of amino acids					639			Number of amino acids					635		Number of amino acids					629
KRT2B (horse LOC100061764)	Feature	Feature #	Human Chr	Human Start	Human Stop	Size	Orientation	Human Accession	Feature	Feature #	Dog Chr	Dog Start	Dog Stop	Size	Orientation	Feature	Feature #	Horse Chr	Horse Start	Horse Stop	Size	Orientation
	NA	NA	NA	NA	NA	NA	NA	NA	NA	NA	NA	NA	NA	NA	NA	Exon	1 UTR	NC_009149.2	69760394	69760443	50	minus
	NA	NA	NA	NA	NA	NA	NA	NA	NA	NA	NA	NA	NA	NA	NA	Exon	1 CDS	NC_009149.2	69759794	69760393	600	minus
	NA	NA	NA	NA	NA	NA	NA	NA	NA	NA	NA	NA	NA	NA	NA	Intron	1	NC_009149.2	69758796	69759793	998	minus
	NA	NA	NA	NA	NA	NA	NA	NA	NA	NA	NA	NA	NA	NA	NA	Exon	2	NC_009149.2	69758581	69758795	215	minus
	NA	NA	NA	NA	NA	NA	NA	NA	NA	NA	NA	NA	NA	NA	NA	Intron	2	NC_009149.2	69758251	69758580	330	minus
	NA	NA	NA	NA	NA	NA	NA	NA	NA	NA	NA	NA	NA	NA	NA	Exon	3	NC_009149.2	69758190	69758250	61	minus
	NA	NA	NA	NA	NA	NA	NA	NA	NA	NA	NA	NA	NA	NA	NA	Intron	3	NC_009149.2	69757385	69758189	805	minus
	NA	NA	NA	NA	NA	NA	NA	NA	NA	NA	NA	NA	NA	NA	NA	Exon	4	NC_009149.2	69757289	69757384	96	minus
	NA	NA	NA	NA	NA	NA	NA	NA	NA	NA	NA	NA	NA	NA	NA	Intron	4	NC_009149.2	69756662	69757288	627	minus
	NA	NA	NA	NA	NA	NA	NA	NA	NA	NA	NA	NA	NA	NA	NA	Exon	5	NC_009149.2	69756497	69756661	165	minus
	NA	NA	NA	NA	NA	NA	NA	NA	NA	NA	NA	NA	NA	NA	NA	Intron	5	NC_009149.2	69756375	69756496	122	minus
	NA	NA	NA	NA	NA	NA	NA	NA	NA	NA	NA	NA	NA	NA	NA	Exon	6	NC_009149.2	69756249	69756374	126	minus
	NA	NA	NA	NA	NA	NA	NA	NA	NA	NA	NA	NA	NA	NA	NA	Intron	6	NC_009149.2	69755765	69756248	484	minus
	NA	NA	NA	NA	NA	NA	NA	NA	NA	NA	NA	NA	NA	NA	NA	Exon	7	NC_009149.2	69755544	69755764	221	minus
	NA	NA	NA	NA	NA	NA	NA	NA	NA	NA	NA	NA	NA	NA	NA	Intron	7	NC_009149.2	69755025	69755543	519	minus
	NA	NA	NA	NA	NA	NA	NA	NA	NA	NA	NA	NA	NA	NA	NA	Exon	8	NC_009149.2	69754990	69755024	35	minus
	NA	NA	NA	NA	NA	NA	NA	NA	NA	NA	NA	NA	NA	NA	NA	Intron	8	NC_009149.2	69754902	69754989	88	minus
	NA	NA	NA	NA	NA	NA	NA	NA	NA	NA	NA	NA	NA	NA	NA	Exon	9 CDS	NC_009149.2	69754564	69754901	338	minus
	NA	NA	NA	NA	NA	NA	NA	NA	NA	NA	NA	NA	NA	NA	NA	Exon	9 UTR	NC_009149.2	69754091	69754563	473	minus
	NA	NA	NA	NA	NA	NA	NA	NA	NA	NA	NA	NA	NA	NA	NA	Total size (bp)					6353
	NA	NA	NA	NA	NA	NA	NA	NA	NA	NA	NA	NA	NA	NA	NA	Number of amino acids					618
KRT2C (horse LOC100146152)	Feature	Feature #	Human Chr	Human Start	Human Stop	Size	Orientation	Human Accession	Feature	Feature #	Dog Chr	Dog Start	Dog Stop	Size	Orientation	Feature	Feature #	Horse Chr	Horse Start	Horse Stop	Size	Orientation	Horse: Gap (chr6:69774035-69776390) in reference assembly spanning several exons. The true length of exon 7 is rather 221 bp than 74 bp.
	NA	NA	NA	NA	NA	NA	NA	NA	NA	NA	NA	NA	NA	NA	NA	Exon	1 UTR	NC_009149.2	69778971	69779000	30	minus
	NA	NA	NA	NA	NA	NA	NA	NA	NA	NA	NA	NA	NA	NA	NA	Exon	1 CDS	NC_009149.2	69778371	69778970	600	minus
	NA	NA	NA	NA	NA	NA	NA	NA	NA	NA	NA	NA	NA	NA	NA	Intron	1	NC_009149.2	69777348	69778370	1023	minus
	NA	NA	NA	NA	NA	NA	NA	NA	NA	NA	NA	NA	NA	NA	NA	Exon	2	NC_009149.2	69777133	69777347	215	minus
	NA	NA	NA	NA	NA	NA	NA	NA	NA	NA	NA	NA	NA	NA	NA	Intron	2	NC_009149.2	69776803	69777132	330	minus
	NA	NA	NA	NA	NA	NA	NA	NA	NA	NA	NA	NA	NA	NA	NA	Exon	3	NC_009149.2	69776742	69776802	61	minus
	NA	NA	NA	NA	NA	NA	NA	NA	NA	NA	NA	NA	NA	NA	NA	Intron	3	NC_009149.2	69774024	69776741	2718	minus
	NA	NA	NA	NA	NA	NA	NA	NA	NA	NA	NA	NA	NA	NA	NA	Exon	4	NC_009149.2			96	minus
	NA	NA	NA	NA	NA	NA	NA	NA	NA	NA	NA	NA	NA	NA	NA	Intron	4	NC_009149.2				minus
	NA	NA	NA	NA	NA	NA	NA	NA	NA	NA	NA	NA	NA	NA	NA	Exon	5	NC_009149.2			165	minus
	NA	NA	NA	NA	NA	NA	NA	NA	NA	NA	NA	NA	NA	NA	NA	Intron	5	NC_009149.2				minus
	NA	NA	NA	NA	NA	NA	NA	NA	NA	NA	NA	NA	NA	NA	NA	Exon	6	NC_009149.2			126	minus
	NA	NA	NA	NA	NA	NA	NA	NA	NA	NA	NA	NA	NA	NA	NA	Intron	6	NC_009149.2				minus
	NA	NA	NA	NA	NA	NA	NA	NA	NA	NA	NA	NA	NA	NA	NA	Exon	7	NC_009149.2	69773950	69774023	74	minus
	NA	NA	NA	NA	NA	NA	NA	NA	NA	NA	NA	NA	NA	NA	NA	Intron	7	NC_009149.2	69773431	69773949	519	minus
	NA	NA	NA	NA	NA	NA	NA	NA	NA	NA	NA	NA	NA	NA	NA	Exon	8	NC_009149.2	69773396	69773430	35	minus
	NA	NA	NA	NA	NA	NA	NA	NA	NA	NA	NA	NA	NA	NA	NA	Intron	8	NC_009149.2	69773308	69773395	88	minus
	NA	NA	NA	NA	NA	NA	NA	NA	NA	NA	NA	NA	NA	NA	NA	Exon	9 CDS	NC_009149.2	69772970	69773307	338	minus
	NA	NA	NA	NA	NA	NA	NA	NA	NA	NA	NA	NA	NA	NA	NA	Exon	9 UTR	NC_009149.2	69772487	69772969	483	minus
	NA	NA	NA	NA	NA	NA	NA	NA	NA	NA	NA	NA	NA	NA	NA	Total size (bp)
	NA	NA	NA	NA	NA	NA	NA	NA	NA	NA	NA	NA	NA	NA	NA	Number of amino acids
KRT3 (dog LOC100683401)	Feature	Feature #	Human Chr	Human Start	Human Stop	Size	Orientation	Human Accession	Feature	Feature #	Dog Chr	Dog Start	Dog Stop	Size	Orientation	Feature	Feature #	Horse Chr	Horse Start	Horse Stop	Size	Orientation
	Exon	1 UTR	NC_000012.12	52796043	52796108	66	minus	NM_057088.2	Exon	1 UTR	NC_006609.3	2319982	2320040	59	plus	Exon	1 UTR	NC_009149.2
	Exon	1 CDS	NC_000012.12	52795398	52796042	645	minus		Exon	1 CDS	NC_006609.3	2320041	2320700	660	plus	Exon	1 CDS	NC_009149.2	69880504	69881145	642	minus
	Intron	1	NC_000012.12	52794332	52795397	1066	minus		Intron	1	NC_006609.3	2320701	2321761	1061	plus	Intron	1	NC_009149.2	69879450	69880503	1054	minus
	Exon	2	NC_000012.12	52794111	52794331	221	minus		Exon	2	NC_006609.3	2321762	2321982	221	plus	Exon	2	NC_009149.2	69879229	69879449	221	minus
	Intron	2	NC_000012.12	52793224	52794110	887	minus		Intron	2	NC_006609.3	2321983	2322542	560	plus	Intron	2	NC_009149.2	69878666	69879228	563	minus
	Exon	3	NC_000012.12	52793163	52793223	61	minus		Exon	3	NC_006609.3	2322543	2322603	61	plus	Exon	3	NC_009149.2	69878605	69878665	61	minus
	Intron	3	NC_000012.12	52792807	52793162	356	minus		Intron	3	NC_006609.3	2322604	2322911	308	plus	Intron	3	NC_009149.2	69878245	69878604	360	minus
	Exon	4	NC_000012.12	52792711	52792806	96	minus		Exon	4	NC_006609.3	2322912	2323007	96	plus	Exon	4	NC_009149.2	69878149	69878244	96	minus
	Intron	4	NC_000012.12	52792404	52792710	307	minus		Intron	4	NC_006609.3	2323008	2323301	294	plus	Intron	4	NC_009149.2	69877849	69878148	300	minus
	Exon	5	NC_000012.12	52792239	52792403	165	minus		Exon	5	NC_006609.3	2323302	2323466	165	plus	Exon	5	NC_009149.2	69877684	69877848	165	minus
	Intron	5	NC_000012.12	52791817	52792238	422	minus		Intron	5	NC_006609.3	2323467	2323896	430	plus	Intron	5	NC_009149.2	69877250	69877683	434	minus
	Exon	6	NC_000012.12	52791691	52791816	126	minus		Exon	6	NC_006609.3	2323897	2324022	126	plus	Exon	6	NC_009149.2	69877124	69877249	126	minus
	Intron	6	NC_000012.12	52791427	52791690	264	minus		Intron	6	NC_006609.3	2324023	2324341	319	plus	Intron	6	NC_009149.2	69876802	69877123	322	minus
	Exon	7	NC_000012.12	52791206	52791426	221	minus		Exon	7	NC_006609.3	2324342	2324562	221	plus	Exon	7	NC_009149.2	69876581	69876801	221	minus
	Intron	7	NC_000012.12	52790873	52791205	333	minus		Intron	7	NC_006609.3	2324563	2324900	338	plus	Intron	7	NC_009149.2	69876230	69876580	351	minus
	Exon	8	NC_000012.12	52790838	52790872	35	minus		Exon	8	NC_006609.3	2324901	2324935	35	plus	Exon	8	NC_009149.2	69876195	69876229	35	minus
	Intron	8	NC_000012.12	52790359	52790837	479	minus		Intron	8	NC_006609.3	2324936	2325411	476	plus	Intron	8	NC_009149.2	69875738	69876194	457	minus
	Exon	9 CDS	NC_000012.12	52790042	52790358	317	minus		Exon	9 CDS	NC_006609.3	2325412	2325659	248	plus	Exon	9 CDS	NC_009149.2	69875412	69875737	326	minus
	Exon	9 UTR	NC_000012.12	52789685	52790041	357	minus		Exon	9 UTR	NC_006609.3	2325660	2325982	323	plus	Exon	9 UTR	NC_009149.2				minus
	Total size (bp)					6424			Total size (bp)					6001		Total size (bp)					5734
	Number of amino acids					628			Number of amino acids					610		Number of amino acids					630
KRT4	Feature	Feature #	Human Chr	Human Start	Human Stop	Size	Orientation	Human Accession	Feature	Feature #	Dog Chr	Dog Start	Dog Stop	Size	Orientation	Feature	Feature #	Horse Chr	Horse Start	Horse Stop	Size	Orientation
	Exon	1 UTR	NC_000012.12	52814059	52814116	58	minus	NM_002272.3	Exon	1 UTR	NC_006609.3	2289954	2290190	237	plus	Exon	1 UTR	NC_009149.2				minus
	Exon	1 CDS	NC_000012.12	52813597	52814058	462	minus		Exon	1 CDS	NC_006609.3	2290191	2290676	486	plus	Exon	1 CDS	NC_009149.2	69901190	69901906	717	minus
	Intron	1	NC_000012.12	52811978	52813596	1619	minus		Intron	1	NC_006609.3	2290677	2292277	1601	plus	Intron	1	NC_009149.2	69899545	69901189	1645	minus
	Exon	2	NC_000012.12	52811763	52811977	215	minus		Exon	2	NC_006609.3	2292278	2292492	215	plus	Exon	2	NC_009149.2	69899330	69899544	215	minus
	Intron	2	NC_000012.12	52810817	52811762	946	minus		Intron	2	NC_006609.3	2292493	2293602	1110	plus	Intron	2	NC_009149.2	69898362	69899329	968	minus
	Exon	3	NC_000012.12	52810756	52810816	61	minus		Exon	3	NC_006609.3	2293603	2293663	61	plus	Exon	3	NC_009149.2	69898301	69898361	61	minus
	Intron	3	NC_000012.12	52809479	52810755	1277	minus		Intron	3	NC_006609.3	2293664	2294019	356	plus	Intron	3	NC_009149.2	69897944	69898300	357	minus
	Exon	4	NC_000012.12	52809383	52809478	96	minus		Exon	4	NC_006609.3	2294020	2294115	96	plus	Exon	4	NC_009149.2	69897848	69897943	96	minus
	Intron	4	NC_000012.12	52808851	52809382	532	minus		Intron	4	NC_006609.3	2294116	2294667	552	plus	Intron	4	NC_009149.2	69897282	69897847	566	minus
	Exon	5	NC_000012.12	52808686	52808850	165	minus		Exon	5	NC_006609.3	2294668	2294832	165	plus	Exon	5	NC_009149.2	69897117	69897281	165	minus
	Intron	5	NC_000012.12	52808420	52808685	266	minus		Intron	5	NC_006609.3	2294833	2295089	257	plus	Intron	5	NC_009149.2	69896851	69897116	266	minus
	Exon	6	NC_000012.12	52808294	52808419	126	minus		Exon	6	NC_006609.3	2295090	2295215	126	plus	Exon	6	NC_009149.2	69896725	69896850	126	minus
	Intron	6	NC_000012.12	52807865	52808293	429	minus		Intron	6	NC_006609.3	2295216	2295646	431	plus	Intron	6	NC_009149.2	69896294	69896724	431	minus
	Exon	7	NC_000012.12	52807644	52807864	221	minus		Exon	7	NC_006609.3	2295647	2295867	221	plus	Exon	7	NC_009149.2	69896073	69896293	221	minus
	Intron	7	NC_000012.12	52807394	52807643	250	minus		Intron	7	NC_006609.3	2295868	2296118	251	plus	Intron	7	NC_009149.2	69895819	69896072	254	minus
	Exon	8	NC_000012.12	52807359	52807393	35	minus		Exon	8	NC_006609.3	2296119	2296153	35	plus	Exon	8	NC_009149.2	69895784	69895818	35	minus
	Intron	8	NC_000012.12	52807251	52807358	108	minus		Intron	8	NC_006609.3	2296154	2296261	108	plus	Intron	8	NC_009149.2	69895675	69895783	109	minus
	Exon	9 CDS	NC_000012.12	52807069	52807250	182	minus		Exon	9 CDS	NC_006609.3	2296262	2296449	188	plus	Exon	9 CDS	NC_009149.2	69895487	69895674	188	minus
	Exon	9 UTR	NC_000012.12	52806543	52807068	526	minus		Exon	9 UTR	NC_006609.3	2296450	2296884	435	plus	Exon	9 UTR	NC_009149.2	69895028	69895486	459	minus
	Total size (bp)					7574			Total size (bp)					6931		Total size (bp)					6879
	Number of amino acids					520			Number of amino acids					530		Number of amino acids					607
KRT5	Feature	Feature #	Human Chr	Human Start	Human Stop	Size	Orientation	Human Accession	Feature	Feature #	Dog Chr	Dog Start	Dog Stop	Size	Orientation	Feature	Feature #	Horse Chr	Horse Start	Horse Stop	Size	Orientation
	Exon	1 UTR	NC_000012.12	52520297	52520459	163	minus	NM_000424.3	Exon	1 UTR	NC_006609.3	2567203	2567289	87	plus	Exon	1 UTR	NC_009149.2	69619146	69619230	85	minus
	Exon	1 CDS	NC_000012.12	52519742	52520296	555	minus		Exon	1 CDS	NC_006609.3	2567290	2567847	558	plus	Exon	1 CDS	NC_009149.2	69618594	69619145	552	minus
	Intron	1	NC_000012.12	52519161	52519741	581	minus		Intron	1	NC_006609.3	2567848	2568403	556	plus	Intron	1	NC_009149.2	69618011	69618593	583	minus
	Exon	2	NC_000012.12	52518946	52519160	215	minus		Exon	2	NC_006609.3	2568404	2568618	215	plus	Exon	2	NC_009149.2	69617796	69618010	215	minus
	Intron	2	NC_000012.12	52518164	52518945	782	minus		Intron	2	NC_006609.3	2568619	2569383	765	plus	Intron	2	NC_009149.2	69617049	69617795	747	minus
	Exon	3	NC_000012.12	52518103	52518163	61	minus		Exon	3	NC_006609.3	2569384	2569444	61	plus	Exon	3	NC_009149.2	69616988	69617048	61	minus
	Intron	3	NC_000012.12	52517993	52518102	110	minus		Intron	3	NC_006609.3	2569445	2569554	110	plus	Intron	3	NC_009149.2	69616880	69616987	108	minus
	Exon	4	NC_000012.12	52517897	52517992	96	minus		Exon	4	NC_006609.3	2569555	2569650	96	plus	Exon	4	NC_009149.2	69616784	69616879	96	minus
	Intron	4	NC_000012.12	52517755	52517896	142	minus		Intron	4	NC_006609.3	2569651	2570242	592	plus	Intron	4	NC_009149.2	69616192	69616783	592	minus
	Exon	5	NC_000012.12	52517590	52517754	165	minus		Exon	5	NC_006609.3	2570243	2570407	165	plus	Exon	5	NC_009149.2	69616027	69616191	165	minus
	Intron	5	NC_000012.12	52517233	52517589	357	minus		Intron	5	NC_006609.3	2570408	2570793	386	plus	Intron	5	NC_009149.2	69615444	69616026	583	minus
	Exon	6	NC_000012.12	52517107	52517232	126	minus		Exon	6	NC_006609.3	2570794	2570919	126	plus	Exon	6	NC_009149.2	69615318	69615443	126	minus
	Intron	6	NC_000012.12	52516858	52517106	249	minus		Intron	6	NC_006609.3	2570920	2571167	248	plus	Intron	6	NC_009149.2	69615063	69615317	255	minus
	Exon	7	NC_000012.12	52516637	52516857	221	minus		Exon	7	NC_006609.3	2571168	2571388	221	plus	Exon	7	NC_009149.2	69614842	69615062	221	minus
	Intron	7	NC_000012.12	52515833	52516636	804	minus		Intron	7	NC_006609.3	2571389	2572373	985	plus	Intron	7	NC_009149.2	69614074	69614841	768	minus
	Exon	8	NC_000012.12	52515798	52515832	35	minus		Exon	8	NC_006609.3	2572374	2572408	35	plus	Exon	8	NC_009149.2	69614039	69614073	35	minus
	Intron	8	NC_000012.12	52515241	52515797	557	minus		Intron	8	NC_006609.3	2572409	2572868	460	plus	Intron	8	NC_009149.2	69613630	69614038	409	minus
	Exon	9 CDS	NC_000012.12	52514942	52515240	299	minus		Exon	9 CDS	NC_006609.3	2572869	2573185	317	plus	Exon	9 CDS	NC_009149.2	69613319	69613629	311	minus
	Exon	9 UTR	NC_000012.12	52514575	52514941	367	minus		Exon	9 UTR	NC_006609.3	2573186	2573530	345	plus	Exon	9 UTR	NC_009149.2	69612978	69613318	341	minus
	Total size (bp)					5885			Total size (bp)					6328		Total size (bp)					6253
	Number of amino acids					590			Number of amino acids					597		Number of amino acids					593
KRT6A (horse LOC100061595)	Feature	Feature #	Human Chr	Human Start	Human Stop	Size	Orientation	Human Accession	Feature	Feature #	Dog Chr	Dog Start	Dog Stop	Size	Orientation	Feature	Feature #	Horse Chr	Horse Start	Horse Stop	Size	Orientation
	Exon	1 UTR	NC_000012.12	52493189	52493397	209	minus	NM_005554.3	Exon	1 UTR	NC_006609.3	2609601	2609663	63	plus	Exon	1 UTR	NC_009149.2	69593754	69593810	57	minus
	Exon	1 CDS	NC_000012.12	52492649	52493188	540	minus		Exon	1 CDS	NC_006609.3	2609664	2610203	540	plus	Exon	1 CDS	NC_009149.2	69593214	69593753	540	minus
	Intron	1	NC_000012.12	52491737	52492648	912	minus		Intron	1	NC_006609.3	2610204	2611092	889	plus	Intron	1	NC_009149.2	69592269	69593213	945	minus
	Exon	2	NC_000012.12	52491522	52491736	215	minus		Exon	2	NC_006609.3	2611093	2611307	215	plus	Exon	2	NC_009149.2	69592054	69592268	215	minus
	Intron	2	NC_000012.12	52491173	52491521	349	minus		Intron	2	NC_006609.3	2611308	2611648	341	plus	Intron	2	NC_009149.2	69591714	69592053	340	minus
	Exon	3	NC_000012.12	52491112	52491172	61	minus		Exon	3	NC_006609.3	2611649	2611709	61	plus	Exon	3	NC_009149.2	69591653	69591713	61	minus
	Intron	3	NC_000012.12	52490954	52491111	158	minus		Intron	3	NC_006609.3	2611710	2611861	152	plus	Intron	3	NC_009149.2	69591509	69591652	144	minus
	Exon	4	NC_000012.12	52490858	52490953	96	minus		Exon	4	NC_006609.3	2611862	2611957	96	plus	Exon	4	NC_009149.2	69591413	69591508	96	minus
	Intron	4	NC_000012.12	52490734	52490857	124	minus		Intron	4	NC_006609.3	2611958	2612081	124	plus	Intron	4	NC_009149.2	69591292	69591412	121	minus
	Exon	5	NC_000012.12	52490569	52490733	165	minus		Exon	5	NC_006609.3	2612082	2612246	165	plus	Exon	5	NC_009149.2	69591127	69591291	165	minus
	Intron	5	NC_000012.12	52490069	52490568	500	minus		Intron	5	NC_006609.3	2612247	2612740	494	plus	Intron	5	NC_009149.2	69590635	69591126	492	minus
	Exon	6	NC_000012.12	52489943	52490068	126	minus		Exon	6	NC_006609.3	2612741	2612866	126	plus	Exon	6	NC_009149.2	69590509	69590634	126	minus
	Intron	6	NC_000012.12	52488549	52489942	1394	minus		Intron	6	NC_006609.3	2612867	2613699	833	plus	Intron	6	NC_009149.2	69589688	69590508	821	minus
	Exon	7	NC_000012.12	52488328	52488548	221	minus		Exon	7	NC_006609.3	2613700	2613920	221	plus	Exon	7	NC_009149.2	69589467	69589687	221	minus
	Intron	7	NC_000012.12	52488104	52488327	224	minus		Intron	7	NC_006609.3	2613921	2614139	219	plus	Intron	7	NC_009149.2	69589249	69589466	218	minus
	Exon	8	NC_000012.12	52488069	52488103	35	minus		Exon	8	NC_006609.3	2614140	2614174	35	plus	Exon	8	NC_009149.2	69589214	69589248	35	minus
	Intron	8	NC_000012.12	52487956	52488068	113	minus		Intron	8	NC_006609.3	2614175	2614287	113	plus	Intron	8	NC_009149.2	69589101	69589213	113	minus
	Exon	9 CDS	NC_000012.12	52487720	52487955	236	minus		Exon	9 CDS	NC_006609.3	2614288	2614541	254	plus	Exon	9 CDS	NC_009149.2	69588835	69589100	266	minus
	Exon	9 UTR	NC_000012.12	52487174	52487719	546	minus		Exon	9 UTR	NC_006609.3	2614542	2615072	531	plus	Exon	9 UTR	NC_009149.2	69588438	69588834	397	minus
	Total size (bp)					6224			Total size (bp)					5472		Total size (bp)					5373
	Number of amino acids					564			Number of amino acids					570		Number of amino acids					574
KRT6B (horse LOC100061560)	Feature	Feature #	Human Chr	Human Start	Human Stop	Size	Orientation	Human Accession	Feature	Feature #	Dog Chr	Dog Start	Dog Stop	Size	Orientation	Feature	Feature #	Horse Chr	Horse Start	Horse Stop	Size	Orientation
	Exon	1 UTR	NC_000012.12	52452079	52452126	48	minus	NM_005555.3	Exon	1 UTR	NC_006609.3	2592030	2592092	63	plus	Exon	1 UTR	NC_009149.2	69574550	69574600	51	minus
	Exon	1 CDS	NC_000012.12	52451539	52452078	540	minus		Exon	1 CDS	NC_006609.3	2592093	2592632	540	plus	Exon	1 CDS	NC_009149.2	69574010	69574549	540	minus
	Intron	1	NC_000012.12	52450621	52451538	918	minus		Intron	1	NC_006609.3	2592633	2593515	883	plus	Intron	1	NC_009149.2	69572805	69574009	1205	minus
	Exon	2	NC_000012.12	52450406	52450620	215	minus		Exon	2	NC_006609.3	2593516	2593730	215	plus	Exon	2	NC_009149.2	69572590	69572804	215	minus
	Intron	2	NC_000012.12	52450073	52450405	333	minus		Intron	2	NC_006609.3	2593731	2594070	340	plus	Intron	2	NC_009149.2	69572246	69572589	344	minus
	Exon	3	NC_000012.12	52450012	52450072	61	minus		Exon	3	NC_006609.3	2594071	2594131	61	plus	Exon	3	NC_009149.2	69572185	69572245	61	minus
	Intron	3	NC_000012.12	52449854	52450011	158	minus		Intron	3	NC_006609.3	2594132	2594283	152	plus	Intron	3	NC_009149.2	69572031	69572184	154	minus
	Exon	4	NC_000012.12	52449758	52449853	96	minus		Exon	4	NC_006609.3	2594284	2594379	96	plus	Exon	4	NC_009149.2	69571935	69572030	96	minus
	Intron	4	NC_000012.12	52449634	52449757	124	minus		Intron	4	NC_006609.3	2594380	2594503	124	plus	Intron	4	NC_009149.2	69571814	69571934	121	minus
	Exon	5	NC_000012.12	52449469	52449633	165	minus		Exon	5	NC_006609.3	2594504	2594668	165	plus	Exon	5	NC_009149.2	69571649	69571813	165	minus
	Intron	5	NC_000012.12	52448968	52449468	501	minus		Intron	5	NC_006609.3	2594669	2595161	493	plus	Intron	5	NC_009149.2	69571157	69571648	492	minus
	Exon	6	NC_000012.12	52448842	52448967	126	minus		Exon	6	NC_006609.3	2595162	2595287	126	plus	Exon	6	NC_009149.2	69571031	69571156	126	minus
	Intron	6	NC_000012.12	52447999	52448841	843	minus		Intron	6	NC_006609.3	2595288	2596083	796	plus	Intron	6	NC_009149.2	69570206	69571030	825	minus
	Exon	7	NC_000012.12	52447778	52447998	221	minus		Exon	7	NC_006609.3	2596084	2596304	221	plus	Exon	7	NC_009149.2	69569985	69570205	221	minus
	Intron	7	NC_000012.12	52447574	52447777	204	minus		Intron	7	NC_006609.3	2596305	2596523	219	plus	Intron	7	NC_009149.2	69569767	69569984	218	minus
	Exon	8	NC_000012.12	52447539	52447573	35	minus		Exon	8	NC_006609.3	2596524	2596558	35	plus	Exon	8	NC_009149.2	69569732	69569766	35	minus
	Intron	8	NC_000012.12	52447426	52447538	113	minus		Intron	8	NC_006609.3	2596559	2596671	113	plus	Intron	8	NC_009149.2	69569619	69569731	113	minus
	Exon	9 CDS	NC_000012.12	52447190	52447425	236	minus		Exon	9 CDS	NC_006609.3	2596672	2596925	254	plus	Exon	9 CDS	NC_009149.2	69569389	69569618	230	minus
	Exon	9 UTR	NC_000012.12	52446651	52447189	539	minus		Exon	9 UTR	NC_006609.3	2596926	2597310	385	plus	Exon	9 UTR	NC_009149.2	69569022	69569388	367	minus
	Total size (bp)					5476			Total size (bp)					5281							5579
	Number of amino acids					564			Number of amino acids					570							562
KRT6C (horse LOC100061525)	Feature	Feature #	Human Chr	Human Start	Human Stop	Size	Orientation	Human Accession	Feature	Feature #	Dog Chr	Dog Start	Dog Stop	Size	Orientation	Feature	Feature #	Horse Chr	Horse Start	Horse Stop	Size	Orientation
	Exon	1 UTR	NC_000012.12	52473738	52473785	48	minus	NM_173086.4	NA	NA	NA	NA	NA	NA	NA	Exon	1 UTR	NC_009149.2	69558281	69558324	44	minus
	Exon	1 CDS	NC_000012.12	52473198	52473737	540	minus		NA	NA	NA	NA	NA	NA	NA	Exon	1 CDS	NC_009149.2	69557741	69558280	540	minus
	Intron	1	NC_000012.12	52472281	52473197	917	minus		NA	NA	NA	NA	NA	NA	NA	Intron	1	NC_009149.2	69556802	69557740	939	minus
	Exon	2	NC_000012.12	52472066	52472280	215	minus		NA	NA	NA	NA	NA	NA	NA	Exon	2	NC_009149.2	69556587	69556801	215	minus
	Intron	2	NC_000012.12	52471733	52472065	333	minus		NA	NA	NA	NA	NA	NA	NA	Intron	2	NC_009149.2	69556242	69556586	345	minus
	Exon	3	NC_000012.12	52471672	52471732	61	minus		NA	NA	NA	NA	NA	NA	NA	Exon	3	NC_009149.2	69556181	69556241	61	minus
	Intron	3	NC_000012.12	52471517	52471671	155	minus		NA	NA	NA	NA	NA	NA	NA	Intron	3	NC_009149.2	69556037	69556180	144	minus
	Exon	4	NC_000012.12	52471421	52471516	96	minus		NA	NA	NA	NA	NA	NA	NA	Exon	4	NC_009149.2	69555941	69556036	96	minus
	Intron	4	NC_000012.12	52471297	52471420	124	minus		NA	NA	NA	NA	NA	NA	NA	Intron	4	NC_009149.2	69555820	69555940	121	minus
	Exon	5	NC_000012.12	52471132	52471296	165	minus		NA	NA	NA	NA	NA	NA	NA	Exon	5	NC_009149.2	69555655	69555819	165	minus
	Intron	5	NC_000012.12	52470631	52471131	501	minus		NA	NA	NA	NA	NA	NA	NA	Intron	5	NC_009149.2	69555163	69555654	492	minus
	Exon	6	NC_000012.12	52470505	52470630	126	minus		NA	NA	NA	NA	NA	NA	NA	Exon	6	NC_009149.2	69555037	69555162	126	minus
	Intron	6	NC_000012.12	52469891	52470504	614	minus		NA	NA	NA	NA	NA	NA	NA	Intron	6	NC_009149.2	69554210	69555036	827	minus
	Exon	7	NC_000012.12	52469670	52469890	221	minus		NA	NA	NA	NA	NA	NA	NA	Exon	7	NC_009149.2	69553989	69554209	221	minus
	Intron	7	NC_000012.12	52469446	52469669	224	minus		NA	NA	NA	NA	NA	NA	NA	Intron	7	NC_009149.2	69553768	69553988	221	minus
	Exon	8	NC_000012.12	52469411	52469445	35	minus		NA	NA	NA	NA	NA	NA	NA	Exon	8	NC_009149.2	69553733	69553767	35	minus
	Intron	8	NC_000012.12	52469298	52469410	113	minus		NA	NA	NA	NA	NA	NA	NA	Intron	8	NC_009149.2	69553620	69553732	113	minus
	Exon	9 CDS	NC_000012.12	52469062	52469297	236	minus		NA	NA	NA	NA	NA	NA	NA	Exon	9 CDS	NC_009149.2	69553390	69553619	230	minus
	Exon	9 UTR	NC_000012.12	52468516	52469061	546	minus		NA	NA	NA	NA	NA	NA	NA	Exon	9 UTR	NC_009149.2	69552989	69553389	401	minus
	Total size (bp)					5270			NA	NA	NA	NA	NA	NA	NA						5336
	Number of amino acids					564			NA	NA	NA	NA	NA	NA	NA						562
KRT6P (horse LOC102150124)	Feature	Feature #	Human Chr	Human Start	Human Stop	Size	Orientation	Human Accession	Feature	Feature #	Dog Chr	Dog Start	Dog Stop	Size	Orientation	Feature	Feature #	Horse Chr	Horse Start	Horse Stop	Size	Orientation
	NA	NA	NA	NA	NA	NA	NA	NA	NA	NA	NA	NA	NA	NA	NA	Pseudogene	1	NC_009149.2	69544745	69548608	3864	minus
KRT7	Feature	Feature #	Human Chr	Human Start	Human Stop	Size	Orientation	Human Accession	Feature	Feature #	Dog Chr	Dog Start	Dog Stop	Size	Orientation	Feature	Feature #	Horse Chr	Horse Start	Horse Stop	Size	Orientation
	Exon	1 UTR	NC_000012.12	52233170	52233296	127	plus	NM_005556.3	Exon	1 UTR	NC_006609.3	2827414	2827489	76	minus	Exon	1 UTR	NC_009149.2	69340069	69340124	56	plus
	Exon	1 CDS	NC_000012.12	52233297	52233620	324	plus		Exon	1 CDS	NC_006609.3	2827081	2827413	333	minus	Exon	1 CDS	NC_009149.2	69340125	69340448	324	plus
	Intron	1	NC_000012.12	52233621	52235154	1534	plus		Intron	1	NC_006609.3	2825784	2827080	1297	minus	Intron	1	NC_009149.2	69340449	69341728	1280	plus
	Exon	2	NC_000012.12	52235155	52235366	212	plus		Exon	2	NC_006609.3	2825572	2825783	212	minus	Exon	2	NC_009149.2	69341729	69341940	212	plus
	Intron	2	NC_000012.12	52235367	52237508	2142	plus		Intron	2	NC_006609.3	2823103	2825571	2469	minus	Intron	2	NC_009149.2	69341941	69343980	2040	plus
	Exon	3	NC_000012.12	52237509	52237569	61	plus		Exon	3	NC_006609.3	2823042	2823102	61	minus	Exon	3	NC_009149.2	69343981	69344041	61	plus
	Intron	3	NC_000012.12	52237570	52238679	1110	plus		Intron	3	NC_006609.3	2821862	2823041	1180	minus	Intron	3	NC_009149.2	69344042	69345198	1157	plus
	Exon	4	NC_000012.12	52238680	52238775	96	plus		Exon	4	NC_006609.3	2821766	2821861	96	minus	Exon	4	NC_009149.2	69345199	69345294	96	plus
	Intron	4	NC_000012.12	52238776	52241471	2696	plus		Intron	4	NC_006609.3	2820131	2821765	1635	minus	Intron	4	NC_009149.2	69345295	69346754	1460	plus
	Exon	5	NC_000012.12	52241472	52241636	165	plus		Exon	5	NC_006609.3	2819966	2820130	165	minus	Exon	5	NC_009149.2	69346755	69346919	165	plus
	Intron	5	NC_000012.12	52241637	52243011	1375	plus		Intron	5	NC_006609.3	2819000	2819965	966	minus	Intron	5	NC_009149.2	69346920	69348042	1123	plus
	Exon	6	NC_000012.12	52243012	52243137	126	plus		Exon	6	NC_006609.3	2818874	2818999	126	minus	Exon	6	NC_009149.2	69348043	69348168	126	plus
	Intron	6	NC_000012.12	52243138	52245411	2274	plus		Intron	6	NC_006609.3	2816108	2818873	2766	minus	Intron	6	NC_009149.2	69348169	69350428	2260	plus
	Exon	7	NC_000012.12	52245412	52245632	221	plus		Exon	7	NC_006609.3	2815887	2816107	221	minus	Exon	7	NC_009149.2	69350429	69350649	221	plus
	Intron	7	NC_000012.12	52245633	52248176	2544	plus		Intron	7	NC_006609.3	2813476	2815886	2411	minus	Intron	7	NC_009149.2	69350650	69353200	2551	plus
	Exon	8	NC_000012.12	52248177	52248211	35	plus		Exon	8	NC_006609.3	2813441	2813475	35	minus	Exon	8	NC_009149.2	69353201	69353235	35	plus
	Intron	8	NC_000012.12	52248212	52248590	379	plus		Intron	8	NC_006609.3	2813072	2813440	369	minus	Intron	8	NC_009149.2	69353236	69353595	360	plus
	Exon	9 CDS	NC_000012.12	52248591	52248760	170	plus		Exon	9 CDS	NC_006609.3	2812914	2813071	158	minus	Exon	9 CDS	NC_009149.2	69353596	69353753	158	plus
	Exon	9 UTR	NC_000012.12	52248761	52248925	165	plus		Exon	9 UTR	NC_006609.3	2812709	2812913	205	minus	Exon	9 UTR	NC_009149.2	69353754	69353896	143	plus
	Total size (bp)					15756			Total size (bp)					14781		Total size (bp)					13828
	Number of amino acids					469			Number of amino acids					468		Number of amino acids					465
KRT8	Feature	Feature #	Human Chr	Human Start	Human Stop	Size	Orientation	Human Accession	Feature	Feature #	Dog Chr	Dog Start	Dog Stop	Size	Orientation	Feature	Feature #	Horse Chr	Horse Start	Horse Stop	Size	Orientation
	Exon	1 UTR	NC_000012.12	52926450	52926469	20	minus	NM_002273.3	Exon	1 UTR	NC_006609.3	2221602	2221688	87	plus	Exon	1 UTR	NC_009149.2	69974649	69974726	78	minus
	Exon	1 CDS	NC_000012.12	52926412	52926449	38	minus		Exon	1 CDS	NC_006609.3	2221689	2222036	348	plus	Exon	1 CDS	NC_009149.2	69974307	69974648	342	minus
	Intron	1	NC_000012.12	52905028	52926411	21384	minus		Intron	1	NC_006609.3	2222037	2225074	3038	plus	Intron	1	NC_009149.2	69971649	69974306	2658	minus
	Exon	2	NC_000012.12	52904658	52905027	370	minus		Exon	2	NC_006609.3	2225075	2225283	209	plus	Exon	2	NC_009149.2	69971440	69971648	209	minus
	Intron	2	NC_000012.12	52902073	52904657	2585	minus		Intron	2	NC_006609.3	2225284	2225900	617	plus	Intron	2	NC_009149.2	69970771	69971439	669	minus
	Exon	3	NC_000012.12	52901864	52902072	209	minus		Exon	3	NC_006609.3	2225901	2225961	61	plus	Exon	3	NC_009149.2	69970710	69970770	61	minus
	Intron	3	NC_000012.12	52901220	52901863	644	minus		Intron	3	NC_006609.3	2225962	2226442	481	plus	Intron	3	NC_009149.2	69970250	69970709	460	minus
	Exon	4	NC_000012.12	52901159	52901219	61	minus		Exon	4	NC_006609.3	2226443	2226538	96	plus	Exon	4	NC_009149.2	69970154	69970249	96	minus
	Intron	4	NC_000012.12	52900684	52901158	475	minus		Intron	4	NC_006609.3	2226539	2227090	552	plus	Intron	4	NC_009149.2	69969562	69970153	592	minus
	Exon	5	NC_000012.12	52900588	52900683	96	minus		Exon	5	NC_006609.3	2227091	2227255	165	plus	Exon	5	NC_009149.2	69969397	69969561	165	minus
	Intron	5	NC_000012.12	52900066	52900587	522	minus		Intron	5	NC_006609.3	2227256	2227498	243	plus	Intron	5	NC_009149.2	69969075	69969396	322	minus
	Exon	6	NC_000012.12	52899775	52900065	291	minus		Exon	6	NC_006609.3	2227499	2227624	126	plus	Exon	6	NC_009149.2	69968949	69969074	126	minus
	Intron	6	NC_000012.12	52898900	52899774	875	minus		Intron	6	NC_006609.3	2227625	2228143	519	plus	Intron	6	NC_009149.2	69968134	69968948	815	minus
	Exon	7	NC_000012.12	52898679	52898899	221	minus		Exon	7	NC_006609.3	2228144	2228364	221	plus	Exon	7	NC_009149.2	69968084	69968133	50	minus
	Intron	7	NC_000012.12	52898520	52898678	159	minus		Intron	7	NC_006609.3	2228365	2228503	139	plus	Intron	7	NC_009149.2	69967948	69968083	136	minus
	Exon	8	NC_000012.12	52898461	52898519	59	minus		Exon	8	NC_006609.3	2228504	2228562	59	plus	Exon	8	NC_009149.2	69967892	69967947	56	minus
	Intron	8	NC_000012.12	52897619	52898460	842	minus		Intron	8	NC_006609.3	2228563	2228921	359	plus	Intron	8	NC_009149.2	69967591	69967891	301	minus
	Exon	9 CDS		52897428	52897618	191	minus		Exon	9 CDS	NC_006609.3	2228922	2229112	191	plus	Exon	9 CDS	NC_009149.2	69967388	69967590	203	minus
	Exon	9 UTR		52897187	52897427	241	minus		Exon	9 UTR	NC_006609.3	2229113	2229343	231	plus	Exon	9 UTR	NC_009149.2	69967151	69967387	237	minus
	Total size (bp)					29042			Total size (bp)					7742		Total size (bp)					7576
	Number of amino acids					511			Number of amino acids					491		Number of amino acids					435
KRT9 / KRT9P	Feature	Feature #	Human Chr	Human Start	Human Stop	Size	Orientation	Human Accession	Feature	Feature #	Dog Chr	Dog Start	Dog Stop	Size	Orientation	Feature	Feature #	Horse Chr	Horse Start	Horse Stop	Size	Orientation	Horse: Gap (chr11:21213421-21213520) in reference assembly and low RNA-seq read coverage(9.25x). Exon lengths / number and resulting protein sequence indicate that the current annotation is incorrect. Due to a low RNA-seq read coverage we could however not reliably determine the correct annotation. XM_005614759.1 contains an extra nucleotide in exon 6 between positions 21'215'848 and 21'215'849 o…
	Exon	1 UTR	NC_000017.11	41571993	41572058	66	minus	NM_000226.3	Exon	1 UTR	NC_006591.3	21204144	21204212	69	plus	Exon	1 UTR	NC_009154.2	21210099	21210318	220	plus
	Exon	1 CDS	NC_000017.11	41571351	41571992	642	minus		Exon	1 CDS	NC_006591.3	21204213	21204806	594	plus	Exon	1 CDS	NC_009154.2	21210319	21210340	22	plus
	Intron	1	NC_000017.11	41570221	41571350	1130	minus		Intron	1	NC_006591.3	21204807	21206343	1537	plus	Intron	1	NC_009154.2	21210341	21212012	1672	plus
	Exon	2	NC_000017.11	41570138	41570220	83	minus		Exon	2	NC_006591.3	21206344	21206426	83	plus	Exon	2	NC_009154.2	21212013	21212623	611	plus
	Intron	2	NC_000017.11	41570016	41570137	122	minus		Intron	2	NC_006591.3	21206427	21206544	118	plus	Intron	2	NC_009154.2	21212624	21214281	1658	plus
	Exon	3	NC_000017.11	41569859	41570015	157	minus		Exon	3	NC_006591.3	21206545	21206701	157	plus	Exon	3	NC_009154.2	21214282	21214364	83	plus
	Intron	3	NC_000017.11	41569588	41569858	271	minus		Intron	3	NC_006591.3	21206702	21206977	276	plus	Intron	3	NC_009154.2	21214365	21214484	120	plus
	Exon	4	NC_000017.11	41569426	41569587	162	minus		Exon	4	NC_006591.3	21206978	21207139	162	plus	Exon	4	NC_009154.2	21214485	21214641	157	plus
	Intron	4	NC_000017.11	41568634	41569425	792	minus		Intron	4	NC_006591.3	21207140	21207909	770	plus	Intron	4	NC_009154.2	21214642	21214923	282	plus
	Exon	5	NC_000017.11	41568508	41568633	126	minus		Exon	5	NC_006591.3	21207910	21208035	126	plus	Exon	5	NC_009154.2	21214924	21215085	162	plus
	Intron	5	NC_000017.11	41568386	41568507	122	minus		Intron	5	NC_006591.3	21208036	21208159	124	plus	Intron	5	NC_009154.2	21215086	21215794	709	plus
	Exon	6	NC_000017.11	41568162	41568385	224	minus		Exon	6	NC_006591.3	21208160	21208383	224	plus	Exon	6	NC_009154.2	21215795	21215919	125	plus
	Intron	6	NC_000017.11	41567751	41568161	411	minus		Intron	6	NC_006591.3	21208384	21208745	362	plus	Intron	6	NC_009154.2	21215920	21216042	123	plus
	Exon	7	NC_000017.11	41567273	41567750	478	minus		Exon	7	NC_006591.3	21208746	21209404	659	plus	Exon	7	NC_009154.2	21216043	21216091	49	plus
	Intron	7	NC_000017.11	41567233	41567272	40	minus		Intron	7	NC_006591.3	21209405	21210508	1104	plus	Intron	7	NC_009154.2	21216092	21217911	1820	plus
	Exon	8 CDS	NC_000017.11	41566153	41567232	1080	minus		Exon	8 CDS	NC_006591.3	21210509	21210528	20	plus	Exon	8	NC_009154.2	21217912	21217943	32	plus
	Exon	8 UTR	NC_000017.11	41565841	41566152	312	minus		Exon	8 UTR	NC_006591.3	21210529	21210797	269	plus	Intron	8	NC_009154.2	21217944	21230529	12586	plus
	Total size (bp)					6218			Total size (bp)					6654		Exon	9 CDS	NC_009154.2	21230530	21230805	276	plus
	Number of amino acids					983			Number of amino acids					674		Exon	9 UTR
																Total size (bp)					20707
																Number of amino acids					504.667
KRT10 / KRT10A	Feature	Feature #	Human Chr	Human Start	Human Stop	Size	Orientation	Human Accession	Feature	Feature #	Dog Chr	Dog Start	Dog Stop	Size	Orientation	Feature	Feature #	Horse Chr	Horse Start	Horse Stop	Size	Orientation
	Exon	1 UTR	NC_000017.11	40822586	40822611	26	minus	NM_000421.3	Exon	1 UTR	NC_006591.3	21863743	21863766	24	plus	Exon	1 UTR	NC_009154.2	21834444	21835132	689	plus
	Exon	1 CDS	NC_000017.11	40821959	40822585	627	minus		Exon	1 CDS	NC_006591.3	21863767	21864363	597	plus	Exon	1 CDS	NC_009154.2	21835133	21835729	597	plus
	Intron	1	NC_000017.11	40821118	40821958	841	minus		Intron	1	NC_006591.3	21864364	21865157	794	plus	Intron	1	NC_009154.2	21835730	21836537	808	plus
	Exon	2	NC_000017.11	40821035	40821117	83	minus		Exon	2	NC_006591.3	21865158	21865240	83	plus	Exon	2	NC_009154.2	21836538	21836620	83	plus
	Intron	2	NC_000017.11	40820668	40821034	367	minus		Intron	2	NC_006591.3	21865241	21865606	366	plus	Intron	2	NC_009154.2	21836621	21836986	366	plus
	Exon	3	NC_000017.11	40820511	40820667	157	minus		Exon	3	NC_006591.3	21865607	21865763	157	plus	Exon	3	NC_009154.2	21836987	21837143	157	plus
	Intron	3	NC_000017.11	40820424	40820510	87	minus		Intron	3	NC_006591.3	21865764	21865857	94	plus	Intron	3	NC_009154.2	21837144	21837235	92	plus
	Exon	4	NC_000017.11	40820262	40820423	162	minus		Exon	4	NC_006591.3	21865858	21866019	162	plus	Exon	4	NC_009154.2	21837236	21837397	162	plus
	Intron	4	NC_000017.11	40820175	40820261	87	minus		Intron	4	NC_006591.3	21866020	21866107	88	plus	Intron	4	NC_009154.2	21837398	21837491	94	plus
	Exon	5	NC_000017.11	40820049	40820174	126	minus		Exon	5	NC_006591.3	21866108	21866233	126	plus	Exon	5	NC_009154.2	21837492	21837617	126	plus
	Intron	5	NC_000017.11	40819735	40820048	314	minus		Intron	5	NC_006591.3	21866234	21866724	491	plus	Intron	5	NC_009154.2	21837618	21837948	331	plus
	Exon	6	NC_000017.11	40819517	40819734	218	minus		Exon	6	NC_006591.3	21866725	21866942	218	plus	Exon	6	NC_009154.2	21837949	21838166	218	plus
	Intron	6	NC_000017.11	40819162	40819516	355	minus		Intron	6	NC_006591.3	21866943	21867282	340	plus	Intron	6	NC_009154.2	21838167	21838545	379	plus
	Exon	7	NC_000017.11	40818787	40819161	375	minus		Exon	7	NC_006591.3	21867283	21867639	357	plus	Exon	7	NC_009154.2	21838546	21838875	330	plus
	Intron	7	NC_000017.11	40818483	40818786	304	minus		Intron	7	NC_006591.3	21867640	21868214	575	plus	Intron	7	NC_009154.2	21838876	21839230	355	plus
	Exon	8 CDS	NC_000017.11	40818476	40818482	7	minus		Exon	8 CDS	NC_006591.3	21868215	21868221	7	plus	Exon	8 CDS	NC_009154.2	21839231	21839237	7	plus
	Exon	8 UTR	NC_000017.11	40818117	40818475	359	minus		Exon	8 UTR	NC_006591.3	21868222	21868585	364	plus	Exon	8 UTR	NC_009154.2	21839238	21839588	351	plus
	Total size (bp)					4495			Total size (bp)					4843		Total size (bp)					5145
	Number of amino acids					584			Number of amino acids					568		Number of amino acids					559
KRT10B (horse LOC100053935)	Feature	Feature #	Human Chr	Human Start	Human Stop	Size	Orientation	Human Accession	Feature	Feature #	Dog Chr	Dog Start	Dog Stop	Size	Orientation	Feature	Feature #	Horse Chr	Horse Start	Horse Stop	Size	Orientation
	NA	NA	NA	NA	NA	NA	NA	NA	NA	NA	NA	NA	NA	NA	NA	Exon	1 UTR	NC_009154.2	21819023	21819089	67	plus
	NA	NA	NA	NA	NA	NA	NA	NA	NA	NA	NA	NA	NA	NA	NA	Exon	1 CDS	NC_009154.2	21819090	21819701	612	plus
	NA	NA	NA	NA	NA	NA	NA	NA	NA	NA	NA	NA	NA	NA	NA	Intron	1	NC_009154.2	21819702	21820509	808	plus
	NA	NA	NA	NA	NA	NA	NA	NA	NA	NA	NA	NA	NA	NA	NA	Exon	2	NC_009154.2	21820510	21820592	83	plus
	NA	NA	NA	NA	NA	NA	NA	NA	NA	NA	NA	NA	NA	NA	NA	Intron	2	NC_009154.2	21820593	21820958	366	plus
	NA	NA	NA	NA	NA	NA	NA	NA	NA	NA	NA	NA	NA	NA	NA	Exon	3	NC_009154.2	21820959	21821115	157	plus
	NA	NA	NA	NA	NA	NA	NA	NA	NA	NA	NA	NA	NA	NA	NA	Intron	3	NC_009154.2	21821116	21821207	92	plus
	NA	NA	NA	NA	NA	NA	NA	NA	NA	NA	NA	NA	NA	NA	NA	Exon	4	NC_009154.2	21821208	21821369	162	plus
	NA	NA	NA	NA	NA	NA	NA	NA	NA	NA	NA	NA	NA	NA	NA	Intron	4	NC_009154.2	21821370	21821463	94	plus
	NA	NA	NA	NA	NA	NA	NA	NA	NA	NA	NA	NA	NA	NA	NA	Exon	5	NC_009154.2	21821464	21821589	126	plus
	NA	NA	NA	NA	NA	NA	NA	NA	NA	NA	NA	NA	NA	NA	NA	Intron	5	NC_009154.2	21821590	21821920	331	plus
	NA	NA	NA	NA	NA	NA	NA	NA	NA	NA	NA	NA	NA	NA	NA	Exon	6	NC_009154.2	21821921	21822138	218	plus
	NA	NA	NA	NA	NA	NA	NA	NA	NA	NA	NA	NA	NA	NA	NA	Intron	6	NC_009154.2	21822139	21822517	379	plus
	NA	NA	NA	NA	NA	NA	NA	NA	NA	NA	NA	NA	NA	NA	NA	Exon	7	NC_009154.2	21822518	21822843	326	plus
	NA	NA	NA	NA	NA	NA	NA	NA	NA	NA	NA	NA	NA	NA	NA	Intron	7	NC_009154.2	21822844	21823178	335	plus
	NA	NA	NA	NA	NA	NA	NA	NA	NA	NA	NA	NA	NA	NA	NA	Exon	8 CDS	NC_009154.2	21823179	21823285	107	plus
	NA	NA	NA	NA	NA	NA	NA	NA	NA	NA	NA	NA	NA	NA	NA	Exon	8 UTR	NC_009154.2	21823286	21823550	265	plus
	NA	NA	NA	NA	NA	NA	NA	NA	NA	NA	NA	NA	NA	NA	NA	Total size (bp)					4528
	NA	NA	NA	NA	NA	NA	NA	NA	NA	NA	NA	NA	NA	NA	NA	Number of amino acids					596
KRT12	Feature	Feature #	Human Chr	Human Start	Human Stop	Size	Orientation	Human Accession	Feature	Feature #	Dog Chr	Dog Start	Dog Stop	Size	Orientation	Feature	Feature #	Horse Chr	Horse Start	Horse Stop	Size	Orientation	Horse: High probability for an erroneus single base insertion in reference genome assembly at position 21766469. The real size of exon 3 is probably 157 bp.
	Exon	1 UTR	NC_000017.11	40867187	40867210	24	minus	NM_000223.3	Exon	1 UTR	NC_006591.3	21823976	21824025	50	plus	Exon	1 UTR	NC_009154.2	21764170	21764187	18	plus
	Exon	1 CDS	NC_000017.11	40866620	40867186	567	minus		Exon	1 CDS	NC_006591.3	21824026	21824637	612	plus	Exon	1 CDS	NC_009154.2	21764188	21764736	549	plus
	Intron	1	NC_000017.11	40866238	40866619	382	minus		Intron	1	NC_006591.3	21824638	21825019	382	plus	Intron	1	NC_009154.2	21764737	21765320	584	plus
	Exon	2	NC_000017.11	40866155	40866237	83	minus		Exon	2	NC_006591.3	21825020	21825102	83	plus	Exon	2	NC_009154.2	21765321	21765403	83	plus
	Intron	2	NC_000017.11	40864963	40866154	1192	minus		Intron	2	NC_006591.3	21825103	21826076	974	plus	Intron	2	NC_009154.2	21765404	21766372	969	plus
	Exon	3	NC_000017.11	40864806	40864962	157	minus		Exon	3	NC_006591.3	21826077	21826233	157	plus	Exon	3	NC_009154.2	21766372	21766529	158	plus
	Intron	3	NC_000017.11	40863865	40864805	941	minus		Intron	3	NC_006591.3	21826234	21827124	891	plus	Intron	3	NC_009154.2	21766530	21767437	908	plus
	Exon	4	NC_000017.11	40863703	40863864	162	minus		Exon	4	NC_006591.3	21827125	21827286	162	plus	Exon	4	NC_009154.2	21767438	21767599	162	plus
	Intron	4	NC_000017.11	40863611	40863702	92	minus		Intron	4	NC_006591.3	21827287	21827384	98	plus	Intron	4	NC_009154.2	21767600	21767696	97	plus
	Exon	5	NC_000017.11	40863485	40863610	126	minus		Exon	5	NC_006591.3	21827385	21827510	126	plus	Exon	5	NC_009154.2	21767697	21767822	126	plus
	Intron	5	NC_000017.11	40863344	40863484	141	minus		Intron	5	NC_006591.3	21827511	21827651	141	plus	Intron	5	NC_009154.2	21767823	21767958	136	plus
	Exon	6	NC_000017.11	40863123	40863343	221	minus		Exon	6	NC_006591.3	21827652	21827872	221	plus	Exon	6	NC_009154.2	21767959	21768179	221	plus
	Intron	6	NC_000017.11	40862636	40863122	487	minus		Intron	6	NC_006591.3	21827873	21828558	686	plus	Intron	6	NC_009154.2	21768180	21768850	671	plus
	Exon	7	NC_000017.11	40862565	40862635	71	minus		Exon	7	NC_006591.3	21828559	21828629	71	plus	Exon	7	NC_009154.2	21768851	21768921	71	plus
	Intron	7	NC_000017.11	40861759	40862564	806	minus		Intron	7	NC_006591.3	21828630	21829124	495	plus	Intron	7	NC_009154.2	21768922	21769387	466	plus
	Exon	8 CDS	NC_000017.11	40861661	40861758	98	minus		Exon	8 CDS	NC_006591.3	21829125	21829216	92	plus	Exon	8 CDS	NC_009154.2	21769388	21769485	98	plus
	Exon	8 UTR	NC_000017.11	40861178	40861660	483	minus		Exon	8 UTR	NC_006591.3	21829217	21829557	341	plus	Exon	8 UTR	NC_009154.2	21769486	21769827	342	plus
	Total size (bp)					0			Total size (bp)					5582		Total size (bp)					5659
	Number of amino acids					494			Number of amino acids					507		Number of amino acids					488.333		Horse: The true length of the KRT12 protein is 488 amino acids. (Due to the fact that there is an erroneous extra base in exon3 of the genome reference).
KRT13 (dog LOC490983; horse LOC100066675)	Feature	Feature #	Human Chr	Human Start	Human Stop	Size	Orientation	Human Accession	Feature	Feature #	Dog Chr	Dog Start	Dog Stop	Size	Orientation	Feature	Feature #	Horse Chr	Horse Start	Horse Stop	Size	Orientation
	Exon	1 UTR	NC_000017.11	41505551	41505613	63	minus	NM_153490.2	Exon	1 UTR	NC_006591.3	21261330	21261382	53	plus	Exon	1 UTR	NC_009154.2	21270090	21270142	53	plus
	Exon	1 CDS	NC_000017.11	41505056	41505550	495	minus		Exon	1 CDS	NC_006591.3	21261383	21261901	519	plus	Exon	1 CDS	NC_009154.2	21270143	21270661	519	plus
	Intron	1	NC_000017.11	41503726	41505055	1330	minus		Intron	1	NC_006591.3	21261902	21262954	1053	plus	Intron	1	NC_009154.2	21270662	21271737	1076	plus
	Exon	2	NC_000017.11	41503643	41503725	83	minus		Exon	2	NC_006591.3	21262955	21263037	83	plus	Exon	2	NC_009154.2	21271738	21271820	83	plus
	Intron	2	NC_000017.11	41503444	41503642	199	minus		Intron	2	NC_006591.3	21263038	21263221	184	plus	Intron	2	NC_009154.2	21271821	21272006	186	plus
	Exon	3	NC_000017.11	41503287	41503443	157	minus		Exon	3	NC_006591.3	21263222	21263378	157	plus	Exon	3	NC_009154.2	21272007	21272163	157	plus
	Intron	3	NC_000017.11	41503099	41503286	188	minus		Intron	3	NC_006591.3	21263379	21263555	177	plus	Intron	3	NC_009154.2	21272164	21272347	184	plus
	Exon	4	NC_000017.11	41502937	41503098	162	minus		Exon	4	NC_006591.3	21263556	21263717	162	plus	Exon	4	NC_009154.2	21272348	21272509	162	plus
	Intron	4	NC_000017.11	41502813	41502936	124	minus		Intron	4	NC_006591.3	21263718	21263805	88	plus	Intron	4	NC_009154.2	21272510	21272597	88	plus
	Exon	5	NC_000017.11	41502687	41502812	126	minus		Exon	5	NC_006591.3	21263806	21263931	126	plus	Exon	5	NC_009154.2	21272598	21272723	126	plus
	Intron	5	NC_000017.11	41502595	41502686	92	minus		Intron	5	NC_006591.3	21263932	21264022	91	plus	Intron	5	NC_009154.2	21272724	21272815	92	plus
	Exon	6	NC_000017.11	41502374	41502594	221	minus		Exon	6	NC_006591.3	21264023	21264243	221	plus	Exon	6	NC_009154.2	21272816	21273036	221	plus
	Intron	6	NC_000017.11	41501745	41502373	629	minus		Intron	6	NC_006591.3	21264244	21264909	666	plus	Intron	6	NC_009154.2	21273037	21273706	670	plus
	Exon	7	NC_000017.11	41501719	41501744	26	minus		Exon	7	NC_006591.3	21264910	21264935	26	plus	Exon	7	NC_009154.2	21273707	21273732	26	plus
	Intron	7	NC_000017.11	41501363	41501718	356	minus		Intron	7	NC_006591.3	21264936	21265237	302	plus	Intron	7	NC_009154.2	21273733	21274028	296	plus
	Exon	8 CDS	NC_000017.11	41501256	41501362	107	minus		Exon	8 CDS	NC_006591.3	21265238	21265302	65	plus	Exon	8 CDS	NC_009154.2	21274029	21274090	62	plus
	Exon	8 UTR	NC_000017.11	41500981	41501255	275	minus		Exon	8 UTR	NC_006591.3	21265303	21265549	247	plus	Exon	8 UTR	NC_009154.2	21274091	21274362	272	plus
	Total size (bp)					4633			Total size (bp)					4220		Total size (bp)					4273
	Number of amino acids					458			Number of amino acids					452		Number of amino acids					451
KRT14 (horse LOC100053489)	Feature	Feature #	Human Chr	Human Start	Human Stop	Size	Orientation	Human Accession	Feature	Feature #	Dog Chr	Dog Start	Dog Stop	Size	Orientation	Feature	Feature #	Horse Chr	Horse Start	Horse Stop	Size	Orientation
	Exon	1 UTR	NC_000017.11	41586835	41586895	61	minus	NM_000526.4	Exon	1 UTR	NC_006591.3	21190672	21190730	59	plus	Exon	1 UTR	NC_009154.2	21198195	21198219	25	plus
	Exon	1 CDS	NC_000017.11	41586310	41586834	525	minus		Exon	1 CDS	NC_006591.3	21190731	21191285	555	plus	Exon	1 CDS	NC_009154.2	21198220	21198762	543	plus
	Intron	1	NC_000017.11	41585058	41586309	1252	minus		Intron	1	NC_006591.3	21191286	21192518	1233	plus	Intron	1	NC_009154.2	21198763	21200019	1257	plus
	Exon	2	NC_000017.11	41584975	41585057	83	minus		Exon	2	NC_006591.3	21192519	21192601	83	plus	Exon	2	NC_009154.2	21200020	21200102	83	plus
	Intron	2	NC_000017.11	41584414	41584974	561	minus		Intron	2	NC_006591.3	21192602	21193154	553	plus	Intron	2	NC_009154.2	21200103	21200655	553	plus
	Exon	3	NC_000017.11	41584257	41584413	157	minus		Exon	3	NC_006591.3	21193155	21193311	157	plus	Exon	3	NC_009154.2	21200656	21200812	157	plus
	Intron	3	NC_000017.11	41583922	41584256	335	minus		Intron	3	NC_006591.3	21193312	21193462	151	plus	Intron	3	NC_009154.2	21200813	21200971	159	plus
	Exon	4	NC_000017.11	41583760	41583921	162	minus		Exon	4	NC_006591.3	21193463	21193624	162	plus	Exon	4	NC_009154.2	21200972	21201133	162	plus
	Intron	4	NC_000017.11	41583677	41583759	83	minus		Intron	4	NC_006591.3	21193625	21193719	95	plus	Intron	4	NC_009154.2	21201134	21201226	93	plus
	Exon	5	NC_000017.11	41583551	41583676	126	minus		Exon	5	NC_006591.3	21193720	21193845	126	plus	Exon	5	NC_009154.2	21201227	21201352	126	plus
	Intron	5	NC_000017.11	41583456	41583550	95	minus		Intron	5	NC_006591.3	21193846	21193936	91	plus	Intron	5	NC_009154.2	21201353	21201446	94	plus
	Exon	6	NC_000017.11	41583235	41583455	221	minus		Exon	6	NC_006591.3	21193937	21194157	221	plus	Exon	6	NC_009154.2	21201447	21201667	221	plus
	Intron	6	NC_000017.11	41583141	41583234	94	minus		Intron	6	NC_006591.3	21194158	21194252	95	plus	Intron	6	NC_009154.2	21201668	21201761	94	plus
	Exon	7	NC_000017.11	41583094	41583140	47	minus		Exon	7	NC_006591.3	21194253	21194299	47	plus	Exon	7	NC_009154.2	21201762	21201808	47	plus
	Intron	7	NC_000017.11	41582533	41583093	561	minus		Intron	7	NC_006591.3	21194300	21194803	504	plus	Intron	7	NC_009154.2	21201809	21202377	569	plus
	Exon	8 CDS	NC_000017.11	41582435	41582532	98	minus		Exon	8 CDS	NC_006591.3	21194804	21194901	98	plus	Exon	8 CDS	NC_009154.2	21202378	21202475	98	plus
	Exon	8 UTR	NC_000017.11	41582279	41582434	156	minus		Exon	8 UTR	NC_006591.3	21194902	21195060	159	plus	Exon	8 UTR	NC_009154.2	21202476	21202618	143	plus
	Total size (bp)					4617			Total size (bp)					4389		Total size (bp)					4424
	Number of amino acids					472			Number of amino acids					482		Number of amino acids					478
KRT15	Feature	Feature #	Human Chr	Human Start	Human Stop	Size	Orientation	Human Accession	Feature	Feature #	Dog Chr	Dog Start	Dog Stop	Size	Orientation	Feature	Feature #	Horse Chr	Horse Start	Horse Stop	Size	Orientation
	Exon	1 UTR	NC_000017.11	41518828	41519018	191	minus	NM_002275.3	Exon	1 UTR	NC_006591.3	21249812	21249886	75	plus	Exon	1 UTR	NC_009154.2	21258306	21258357	52	plus
	Exon	1 CDS	NC_000017.11	41518330	41518827	498	minus		Exon	1 CDS	NC_006591.3	21249887	21250438	552	plus	Exon	1 CDS	NC_009154.2	21258358	21258897	540	plus
	Intron	1	NC_000017.11	41517166	41518329	1164	minus		Intron	1	NC_006591.3	21250439	21251321	883	plus	Intron	1	NC_009154.2	21258898	21259799	902	plus
	Exon	2	NC_000017.11	41517083	41517165	83	minus		Exon	2	NC_006591.3	21251322	21251404	83	plus	Exon	2	NC_009154.2	21259800	21259882	83	plus
	Intron	2	NC_000017.11	41516965	41517082	118	minus		Intron	2	NC_006591.3	21251405	21251529	125	plus	Intron	2	NC_009154.2	21259883	21259997	115	plus
	Exon	3	NC_000017.11	41516808	41516964	157	minus		Exon	3	NC_006591.3	21251530	21251686	157	plus	Exon	3	NC_009154.2	21259998	21260154	157	plus
	Intron	3	NC_000017.11	41516266	41516807	542	minus		Intron	3	NC_006591.3	21251687	21252150	464	plus	Intron	3	NC_009154.2	21260155	21260618	464	plus
	Exon	4	NC_000017.11	41516104	41516265	162	minus		Exon	4	NC_006591.3	21252151	21252312	162	plus	Exon	4	NC_009154.2	21260619	21260780	162	plus
	Intron	4	NC_000017.11	41516011	41516103	93	minus		Intron	4	NC_006591.3	21252313	21252397	85	plus	Intron	4	NC_009154.2	21260781	21260866	86	plus
	Exon	5	NC_000017.11	41515885	41516010	126	minus		Exon	5	NC_006591.3	21252398	21252523	126	plus	Exon	5	NC_009154.2	21260867	21260992	126	plus
	Intron	5	NC_000017.11	41515693	41515884	192	minus		Intron	5	NC_006591.3	21252524	21252688	165	plus	Intron	5	NC_009154.2	21260993	21261170	178	plus
	Exon	6	NC_000017.11	41515472	41515692	221	minus		Exon	6	NC_006591.3	21252689	21252909	221	plus	Exon	6	NC_009154.2	21261171	21261391	221	plus
	Intron	6	NC_000017.11	41514675	41515471	797	minus		Intron	6	NC_006591.3	21252910	21253231	322	plus	Intron	6	NC_009154.2	21261392	21261849	458	plus
	Exon	7	NC_000017.11	41514649	41514674	26	minus		Exon	7	NC_006591.3	21253232	21253257	26	plus	Exon	7	NC_009154.2	21261850	21261875	26	plus
	Intron	7	NC_000017.11	41514121	41514648	528	minus		Intron	7	NC_006591.3	21253258	21253774	517	plus	Intron	7	NC_009154.2	21261876	21262582	707	plus
	Exon	8 CDS	NC_000017.11	41514023	41514120	98	minus		Exon	8 CDS	NC_006591.3	21253775	21253866	92	plus	Exon	8 CDS	NC_009154.2	21262583	21262677	95	plus
	Exon	8 UTR	NC_000017.11	41513745	41514022	278	minus		Exon	8 UTR	NC_006591.3	21253867	21254120	254	plus	Exon	8 UTR	NC_009154.2	21262678	21262925	248	plus
	Total size (bp)					5274			Total size (bp)					4309		Total size (bp)					4620
	Number of amino acids					456			Number of amino acids					472		Number of amino acids					469
KRT16 (horse LOC100066610)	Feature	Feature #	Human Chr	Human Start	Human Stop	Size	Orientation	Human Accession	Feature	Feature #	Dog Chr	Dog Start	Dog Stop	Size	Orientation	Feature	Feature #	Horse Chr	Horse Start	Horse Stop	Size	Orientation
	Exon	1 UTR	NC_000017.11	41612689	41612827	139	minus	NM_005557.3	Exon	1 UTR	NC_006591.3	21167706	21167796	91	plus	Exon	1 UTR	NC_009154.2	21175868	21175946	79	plus
	Exon	1 CDS	NC_000017.11	41612158	41612688	531	minus		Exon	1 CDS	NC_006591.3	21167797	21168330	534	plus	Exon	1 CDS	NC_009154.2	21175947	21176475	529	plus
	Intron	1	NC_000017.11	41611722	41612157	436	minus		Intron	1	NC_006591.3	21168331	21168793	463	plus	Intron	1	NC_009154.2	21176476	21176948	473	plus
	Exon	2	NC_000017.11	41611639	41611721	83	minus		Exon	2	NC_006591.3	21168794	21168876	83	plus	Exon	2	NC_009154.2	21176949	21177031	83	plus
	Intron	2	NC_000017.11	41611502	41611638	137	minus		Intron	2	NC_006591.3	21168877	21168998	122	plus	Intron	2	NC_009154.2	21177032	21177174	143	plus
	Exon	3	NC_000017.11	41611345	41611501	157	minus		Exon	3	NC_006591.3	21168999	21169155	157	plus	Exon	3	NC_009154.2	21177175	21177331	157	plus
	Intron	3	NC_000017.11	41611231	41611344	114	minus		Intron	3	NC_006591.3	21169156	21169248	93	plus	Intron	3	NC_009154.2	21177332	21177444	113	plus
	Exon	4	NC_000017.11	41611069	41611230	162	minus		Exon	4	NC_006591.3	21169249	21169410	162	plus	Exon	4	NC_009154.2	21177445	21177606	162	plus
	Intron	4	NC_000017.11	41610980	41611068	89	minus		Intron	4	NC_006591.3	21169411	21169501	91	plus	Intron	4	NC_009154.2	21177607	21177700	94	plus
	Exon	5	NC_000017.11	41610854	41610979	126	minus		Exon	5	NC_006591.3	21169502	21169627	126	plus	Exon	5	NC_009154.2	21177701	21177826	126	plus
	Intron	5	NC_000017.11	41610552	41610853	302	minus		Intron	5	NC_006591.3	21169628	21169927	300	plus	Intron	5	NC_009154.2	21177827	21178116	290	plus
	Exon	6	NC_000017.11	41610331	41610551	221	minus		Exon	6	NC_006591.3	21169928	21170148	221	plus	Exon	6	NC_009154.2	21178117	21178337	221	plus
	Intron	6	NC_000017.11	41610237	41610330	94	minus		Intron	6	NC_006591.3	21170149	21170243	95	plus	Intron	6	NC_009154.2	21178338	21178429	92	plus
	Exon	7	NC_000017.11	41610190	41610236	47	minus		Exon	7	NC_006591.3	21170244	21170290	47	plus	Exon	7	NC_009154.2	21178430	21178476	47	plus
	Intron	7	NC_000017.11	41610030	41610189	160	minus		Intron	7	NC_006591.3	21170291	21170394	104	plus	Intron	7	NC_009154.2	21178477	21178588	112	plus
	Exon	8 CDS	NC_000017.11	41609935	41610029	95	minus		Exon	8 CDS	NC_006591.3	21170395	21170498	104	plus	Exon	8 CDS	NC_009154.2	21178589	21178689	101	plus
	Exon	8 UTR	NC_000017.11	41609778	41609934	157	minus		Exon	8 UTR	NC_006591.3	21170499	21170650	152	plus	Exon	8 UTR	NC_009154.2	21178690	21178830	141	plus
	Total size (bp)					3050			Total size (bp)					2945		Total size (bp)					2963
	Number of amino acids					473			Number of amino acids					477		Number of amino acids					474.333		Horse: High probability for 7 erroneus single base insertion in reference genome assembly at positions 21175984, 21175992, 21176000, 21176024, 21176032, 21176073, 21176115 and for single base deletions afer positions 21175893 (delG), 21175912 (delC), 21175914 (delC), 21175933 (delC). The real size of exon 3 is probably 522 bp.
KRT17	Feature	Feature #	Human Chr	Human Start	Human Stop	Size	Orientation	Human Accession	Feature	Feature #	Dog Chr	Dog Start	Dog Stop	Size	Orientation	Feature	Feature #	Horse Chr	Horse Start	Horse Stop	Size	Orientation
	Exon	1 UTR	NC_000017.11	41624510	41624630	121	minus	NM_000422.2	Exon	1 UTR	NC_006591.3	21155002	21155115	114	plus	Exon	1 UTR	NC_009154.2	21162852	21162919	68	plus
	Exon	1 CDS	NC_000017.11	41624078	41624509	432	minus		Intron	1	NC_006591.3	21155116	21156044	929	plus	Exon	1 CDS	NC_009154.2	21162920	21163351	432	plus
	Intron	1	NC_000017.11	41623033	41624077	1045	minus		Exon	2 UTR	NC_006591.3	21156045	21156392	348	plus	Intron	1	NC_009154.2	21163352	21164431	1080	plus
	Exon	2	NC_000017.11	41622950	41623032	83	minus		Exon	2 CDS	NC_006591.3	21156393	21156824	432	plus	Exon	2	NC_009154.2	21164432	21164514	83	plus
	Intron	2	NC_000017.11	41622512	41622949	438	minus		Intron	2	NC_006591.3	21156825	21157872	1048	plus	Intron	2	NC_009154.2	21164515	21164923	409	plus
	Exon	3	NC_000017.11	41622355	41622511	157	minus		Exon	3	NC_006591.3	21157873	21157955	83	plus	Exon	3	NC_009154.2	21164924	21165080	157	plus
	Intron	3	NC_000017.11	41621755	41622354	600	minus		Intron	3	NC_006591.3	21157956	21158336	381	plus	Intron	3	NC_009154.2	21165081	21165686	606	plus
	Exon	4	NC_000017.11	41621593	41621754	162	minus		Exon	4	NC_006591.3	21158337	21158493	157	plus	Exon	4	NC_009154.2	21165687	21165848	162	plus
	Intron	4	NC_000017.11	41621092	41621592	501	minus		Intron	4	NC_006591.3	21158494	21159116	623	plus	Intron	4	NC_009154.2	21165849	21166451	603	plus
	Exon	5	NC_000017.11	41620966	41621091	126	minus		Exon	5	NC_006591.3	21159117	21159278	162	plus	Exon	5	NC_009154.2	21166452	21166577	126	plus
	Intron	5	NC_000017.11	41620880	41620965	86	minus		Intron	5	NC_006591.3	21159279	21159863	585	plus	Intron	5	NC_009154.2	21166578	21166669	92	plus
	Exon	6	NC_000017.11	41620659	41620879	221	minus		Exon	6	NC_006591.3	21159864	21159989	126	plus	Exon	6	NC_009154.2	21166670	21166890	221	plus
	Intron	6	NC_000017.11	41620559	41620658	100	minus		Intron	6	NC_006591.3	21159990	21160081	92	plus	Intron	6	NC_009154.2	21166891	21166980	90	plus
	Exon	7	NC_000017.11	41620536	41620558	23	minus		Exon	7	NC_006591.3	21160082	21160302	221	plus	Exon	7	NC_009154.2	21166981	21167006	26	plus
	Intron	7	NC_000017.11	41619689	41620535	847	minus		Intron	7	NC_006591.3	21160303	21160398	96	plus	Intron	7	NC_009154.2	21167007	21168467	1461	plus
	Exon	8 CDS	NC_000017.11	41619594	41619688	95	minus		Exon	8	NC_006591.3	21160399	21160424	26	plus	Exon	8 CDS	NC_009154.2	21168468	21168562	95	plus
	Exon	8 UTR	NC_000017.11	41619440	41619593	154	minus		Intron	8	NC_006591.3	21160425	21161202	778	plus	Exon	8 UTR	NC_009154.2	21168563	21168607	45	plus
	Total size (bp)					5415			Exon	9 CDS	NC_006591.3	21161203	21161297	95	plus	Total size (bp)					9053.33
	Number of amino acids					432			Exon	9 UTR	NC_006591.3	21161298	21161407	110	plus	Number of amino acids					433
									Total size (bp)					6406
									Number of amino acids					433
KRT18	Feature	Feature #	Human Chr	Human Start	Human Stop	Size	Orientation	Human Accession	Feature	Feature #	Dog Chr	Dog Start	Dog Stop	Size	Orientation	Feature	Feature #	Horse Chr	Horse Start	Horse Stop	Size	Orientation
	Exon	1 UTR	NC_000012.12	52949059	52949173	115	plus	NM_000224.2	Exon	1 UTR	NC_006609.3	2193286	2193370	85	minus	Exon	1 UTR	NC_009149.2	70004460	70004537	78	plus
	Exon	1 CDS	NC_000012.12	52949174	52949590	417	plus		Exon	1 CDS	NC_006609.3	2192866	2193285	420	minus	Exon	1 CDS	NC_009149.2	70004538	70004954	417	plus
	Intron	1	NC_000012.12	52949591	52950327	737	plus		Intron	1	NC_006609.3	2192112	2192865	754	minus	Intron	1	NC_009149.2	70004955	70005700	746	plus
	Exon	2	NC_000012.12	52950328	52950410	83	plus		Exon	2	NC_006609.3	2192029	2192111	83	minus	Exon	2	NC_009149.2	70005701	70005783	83	plus
	Intron	2	NC_000012.12	52950411	52950749	339	plus		Intron	2	NC_006609.3	2191702	2192028	327	minus	Intron	2	NC_009149.2	70005784	70006134	351	plus
	Exon	3	NC_000012.12	52950750	52950906	157	plus		Exon	3	NC_006609.3	2191545	2191701	157	minus	Exon	3	NC_009149.2	70006135	70006291	157	plus
	Intron	3	NC_000012.12	52950907	52951480	574	plus		Intron	3	NC_006609.3	2190747	2191544	798	minus	Intron	3	NC_009149.2	70006292	70006872	581	plus
	Exon	4	NC_000012.12	52951481	52951645	165	plus		Exon	4	NC_006609.3	2190582	2190746	165	minus	Exon	4	NC_009149.2	70006873	70007037	165	plus
	Intron	4	NC_000012.12	52951646	52951730	85	plus		Intron	4	NC_006609.3	2190480	2190581	102	minus	Intron	4	NC_009149.2	70007038	70007141	104	plus
	Exon	5	NC_000012.12	52951731	52951856	126	plus		Exon	5	NC_006609.3	2190354	2190479	126	minus	Exon	5	NC_009149.2	70007142	70007491	350	plus
	Intron	5	NC_000012.12	52951857	52952118	262	plus		Intron	5	NC_006609.3	2190054	2190353	300	minus	Intron	5	NC_009149.2	70007492	70007847	356	plus
	Exon	6	NC_000012.12	52952119	52952342	224	plus		Exon	6	NC_006609.3	2189830	2190053	224	minus	Exon	6 CDS	NC_009149.2	70007848	70007968	121	plus
	Intron	6	NC_000012.12	52952343	52952721	379	plus		Intron	6	NC_006609.3	2189448	2189829	382	minus	Exon	6 UTR	NC_009149.2	70007969	70008037	69	plus
	Exon	7 CDS	NC_000012.12	52952722	52952842	121	plus		Exon	7 CDS	NC_006609.3	2189327	2189447	121	minus	Total size (bp)					3578
	Exon	7 UTR	NC_000012.12	52952843	52952901	59	plus		Exon	7 UTR	NC_006609.3	2189269	2189326	58	minus	Number of amino acids					430
	Total size (bp)					3843			Total size (bp)					4102
	Number of amino acids					430			Number of amino acids					431
KRT19	Feature	Feature #	Human Chr	Human Start	Human Stop	Size	Orientation	Human Accession	Feature	Feature #	Dog Chr	Dog Start	Dog Stop	Size	Orientation	Feature	Feature #	Horse Chr	Horse Start	Horse Stop	Size	Orientation
	Exon	1 UTR	NC_000017.11	41528248	41528389	142	minus	NM_002276.4	Exon	1 UTR	NC_006591.3	21240734	21240777	44	plus	Exon	1 UTR	NC_009154.2	21248794	21248857	64	plus
	Exon	1 CDS	NC_000017.11	41527828	41528247	420	minus		Exon	1 CDS	NC_006591.3	21240778	21241194	417	plus	Exon	1 CDS	NC_009154.2	21248858	21249277	420	plus
	Intron	1	NC_000017.11	41525274	41527827	2554	minus		Intron	1	NC_006591.3	21241195	21243128	1934	plus	Intron	1	NC_009154.2	21249278	21251299	2022	plus
	Exon	2	NC_000017.11	41525191	41525273	83	minus		Exon	2	NC_006591.3	21243129	21243211	83	plus	Exon	2	NC_009154.2	21251300	21251382	83	plus
	Intron	2	NC_000017.11	41525000	41525190	191	minus		Intron	2	NC_006591.3	21243212	21243451	240	plus	Intron	2	NC_009154.2	21251383	21251620	238	plus
	Exon	3	NC_000017.11	41524843	41524999	157	minus		Exon	3	NC_006591.3	21243452	21243608	157	plus	Exon	3	NC_009154.2	21251621	21251777	157	plus
	Intron	3	NC_000017.11	41524541	41524842	302	minus		Intron	3	NC_006591.3	21243609	21243913	305	plus	Intron	3	NC_009154.2	21251778	21252077	300	plus
	Exon	4	NC_000017.11	41524379	41524540	162	minus		Exon	4	NC_006591.3	21243914	21244075	162	plus	Exon	4	NC_009154.2	21252078	21252239	162	plus
	Intron	4	NC_000017.11	41524269	41524378	110	minus		Intron	4	NC_006591.3	21244076	21244184	109	plus	Intron	4	NC_009154.2	21252240	21252353	114	plus
	Exon	5	NC_000017.11	41524143	41524268	126	minus		Exon	5	NC_006591.3	21244185	21244310	126	plus	Exon	5	NC_009154.2	21252354	21252479	126	plus
	Intron	5	NC_000017.11	41523998	41524142	145	minus		Intron	5	NC_006591.3	21244311	21244437	127	plus	Intron	5	NC_009154.2	21252480	21252604	125	plus
	Exon	6 CDS	NC_000017.11	41523743	41523997	255	minus		Exon	6 CDS	NC_006591.3	21244438	21244692	255	plus	Exon	6 CDS	NC_009154.2	21252605	21252892	288	plus
	Exon	6 UTR	NC_000017.11	41523617	41523742	126	minus		Exon	6 UTR	NC_006591.3	21244693	21245033	341	plus	Exon	6 UTR	NC_009154.2	21252893	21253019	127	plus
	Total size (bp)					0			Total size (bp)					4300		Total size (bp)					4226
	Number of amino acids					400			Number of amino acids					399		Number of amino acids					411
KRT20	Feature	Feature #	Human Chr	Human Start	Human Stop	Size	Orientation	Human Accession	Feature	Feature #	Dog Chr	Dog Start	Dog Stop	Size	Orientation	Feature	Feature #	Horse Chr	Horse Start	Horse Stop	Size	Orientation
	Exon	1 UTR	NC_000017.11	40885186	40885243	58	minus	NM_019010.2	Exon	1 UTR	NC_006591.3	21808525	21808547	23	plus	Exon	1 UTR	NC_009154.2	21749910	21749986	77	plus
	Exon	1 CDS	NC_000017.11	40884796	40885185	390	minus		Exon	1 CDS	NC_006591.3	21808548	21808952	405	plus	Exon	1 CDS	NC_009154.2	21749987	21750394	408	plus
	Intron	1	NC_000017.11	40882655	40884795	2141	minus		Intron	1	NC_006591.3	21808953	21811517	2565	plus	Intron	1	NC_009154.2	21750395	21752336	1942	plus
	Exon	2	NC_000017.11	40882572	40882654	83	minus		Exon	2	NC_006591.3	21811518	21811600	83	plus	Exon	2	NC_009154.2	21752337	21752419	83	plus
	Intron	2	NC_000017.11	40880771	40882571	1801	minus		Intron	2	NC_006591.3	21811601	21812898	1298	plus	Intron	2	NC_009154.2	21752420	21753751	1332	plus
	Exon	3	NC_000017.11	40880614	40880770	157	minus		Exon	3	NC_006591.3	21812899	21813055	157	plus	Exon	3	NC_009154.2	21753752	21753908	157	plus
	Intron	3	NC_000017.11	40880262	40880613	352	minus		Intron	3	NC_006591.3	21813056	21813340	285	plus	Intron	3	NC_009154.2	21753909	21754241	333	plus
	Exon	4	NC_000017.11	40880100	40880261	162	minus		Exon	4	NC_006591.3	21813341	21813502	162	plus	Exon	4	NC_009154.2	21754242	21754403	162	plus
	Intron	4	NC_000017.11	40879939	40880099	161	minus		Intron	4	NC_006591.3	21813503	21813616	114	plus	Intron	4	NC_009154.2	21754404	21754536	133	plus
	Exon	5	NC_000017.11	40879813	40879938	126	minus		Exon	5	NC_006591.3	21813617	21813742	126	plus	Exon	5	NC_009154.2	21754537	21754662	126	plus
	Intron	5	NC_000017.11	40878366	40879812	1447	minus		Intron	5	NC_006591.3	21813743	21815586	1844	plus	Intron	5	NC_009154.2	21754663	21755600	938	plus
	Exon	6	NC_000017.11	40878145	40878365	221	minus		Exon	6	NC_006591.3	21815587	21815810	224	plus	Exon	6	NC_009154.2	21755601	21755821	221	plus
	Intron	6	NC_000017.11	40877418	40878144	727	minus		Intron	6	NC_006591.3	21815811	21816720	910	plus	Intron	6	NC_009154.2	21755822	21756552	731	plus
	Exon	7	NC_000017.11	40877380	40877417	38	minus		Exon	7	NC_006591.3	21816721	21816770	50	plus	Exon	7	NC_009154.2	21756553	21756572	20	plus
	Intron	7	NC_000017.11	40876459	40877379	921	minus		Intron	7	NC_006591.3	21816771	21817289	519	plus	Intron	7	NC_009154.2	21756573	21757096	524	plus
	Exon	8 CDS	NC_000017.11	40876361	40876458	98	minus		Exon	8 CDS	NC_006591.3	21817290	21817387	98	plus	Exon	8 CDS	NC_009154.2	21757097	21757194	98	plus
	Exon	8 UTR	NC_000017.11	40875889	40876360	472	minus		Exon	8 UTR	NC_006591.3	21817388	21817899	512	plus	Exon	8 UTR	NC_009154.2	21757195	21757889	695	plus
						9355			Total size (bp)					9375		Total size (bp)					7980
						424			Number of amino acids					434		Number of amino acids					424
KRT23	Feature	Feature #	Human Chr	Human Start	Human Stop	Size	Orientation	Human Accession	Feature	Feature #	Dog Chr	Dog Start	Dog Stop	Size	Orientation	Feature	Feature #	Horse Chr	Horse Start	Horse Stop	Size	Orientation
	Exon	1 UTR	NC_000017.11	40937346	40937643	298	minus	NM_015515.4	Exon	1 UTR	NC_006591.3	21751357	21751417	61	plus	Exon	1 UTR	NC_009154.2	21702423	21705150	2728	plus
	Intron	1	NC_000017.11	40936954	40937345	392	minus		Exon	1 CDS	NC_006591.3	21751418	21751813	396	plus	Exon	1 CDS	NC_009154.2	21705151	21705564	414	plus
	Exon	2 UTR	NC_000017.11	40936604	40936953	350	minus		Intron	1	NC_006591.3	21751814	21758358	6545	plus	Intron	1	NC_009154.2	21705565	21710155	4591	plus
	Exon	2 CDS	NC_000017.11	40936208	40936603	396	minus		Exon	2	NC_006591.3	21758359	21758441	83	plus	Exon	2	NC_009154.2	21710156	21710238	83	plus
	Intron	2	NC_000017.11	40931456	40936207	4752	minus		Intron	2	NC_006591.3	21758442	21759778	1337	plus	Intron	2	NC_009154.2	21710239	21710908	670	plus
	Exon	3	NC_000017.11	40931373	40931455	83	minus		Exon	3	NC_006591.3	21759779	21759935	157	plus	Exon	3	NC_009154.2	21710909	21711065	157	plus
	Intron	3	NC_000017.11	40930097	40931372	1276	minus		Intron	3	NC_006591.3	21759936	21761246	1311	plus	Intron	3	NC_009154.2	21711066	21712390	1325	plus
	Exon	4	NC_000017.11	40929940	40930096	157	minus		Exon	4	NC_006591.3	21761247	21761408	162	plus	Exon	4	NC_009154.2	21712391	21712552	162	plus
	Intron	4	NC_000017.11	40928608	40929939	1332	minus		Intron	4	NC_006591.3	21761409	21761494	86	plus	Intron	4	NC_009154.2	21712553	21712638	86	plus
	Exon	5	NC_000017.11	40928446	40928607	162	minus		Exon	5	NC_006591.3	21761495	21761617	123	plus	Exon	5	NC_009154.2	21712639	21712761	123	plus
	Intron	5	NC_000017.11	40928361	40928445	85	minus		Intron	5	NC_006591.3	21761618	21764413	2796	plus	Intron	5	NC_009154.2	21712762	21715550	2789	plus
	Exon	6	NC_000017.11	40928238	40928360	123	minus		Exon	6	NC_006591.3	21764414	21764634	221	plus	Exon	6	NC_009154.2	21715551	21715771	221	plus
	Intron	6	NC_000017.11	40925575	40928237	2663	minus		Intron	6	NC_006591.3	21764635	21765645	1011	plus	Intron	6	NC_009154.2	21715772	21716610	839	plus
	Exon	7	NC_000017.11	40925354	40925574	221	minus		Exon	7	NC_006591.3	21765646	21765677	32	plus	Exon	7	NC_009154.2	21716611	21716642	32	plus
	Intron	7	NC_000017.11	40924504	40925353	850	minus		Intron	7	NC_006591.3	21765678	21767085	1408	plus	Intron	7	NC_009154.2	21716643	21718044	1402	plus
	Exon	8	NC_000017.11	40924472	40924503	32	minus		Exon	8 CDS	NC_006591.3	21767086	21767171	86	plus	Exon	8 CDS	NC_009154.2	21718045	21718139	95	plus
	Intron	8	NC_000017.11	40923084	40924471	1388	minus		Exon	8 UTR	NC_006591.3	21767172	21767467	296	plus	Exon	8 UTR	NC_009154.2	21718140	21718827	688	plus
	Exon	9 CDS	NC_000017.11	40922989	40923083	95	minus		Total size (bp)					16163		Total size (bp)					16046
	Exon	9 UTR	NC_000017.11	40922696	40922988	293	minus		Number of amino acids					419		Number of amino acids					428
	Total size (bp)					14948
	Number of amino acids					422
KRT24	Feature	Feature #	Human Chr	Human Start	Human Stop	Size	Orientation	Human Accession	Feature	Feature #	Dog Chr	Dog Start	Dog Stop	Size	Orientation	Feature	Feature #	Horse Chr	Horse Start	Horse Stop	Size	Orientation
	Exon	1 UTR	NC_000017.11	40703694	40703750	57	minus	NM_019016.2	Exon	1 UTR	NC_006591.3	21967104	21967226	123	plus	Exon	1 UTR	NC_009154.2			1	plus
	Exon	1 CDS	NC_000017.11	40703079	40703693	615	minus		Exon	1 CDS	NC_006591.3	21967227	21967871	645	plus	Exon	1 CDS	NC_009154.2	21932017	21932574	558	plus
	Intron	1	NC_000017.11	40701934	40703078	1145	minus		Intron	1	NC_006591.3	21967872	21968675	804	plus	Intron	1	NC_009154.2	21932575	21933389	815	plus
	Exon	2	NC_000017.11	40701851	40701933	83	minus		Exon	2	NC_006591.3	21968676	21968758	83	plus	Exon	2	NC_009154.2	21933390	21933472	83	plus
	Intron	2	NC_000017.11	40701297	40701850	554	minus		Intron	2	NC_006591.3	21968759	21969279	521	plus	Intron	2	NC_009154.2	21933473	21933855	383	plus
	Exon	3	NC_000017.11	40701140	40701296	157	minus		Exon	3	NC_006591.3	21969280	21969436	157	plus	Exon	3	NC_009154.2	21933856	21934012	157	plus
	Intron	3	NC_000017.11	40700384	40701139	756	minus		Intron	3	NC_006591.3	21969437	21969714	278	plus	Intron	3	NC_009154.2	21934013	21934274	262	plus
	Exon	4	NC_000017.11	40700222	40700383	162	minus		Exon	4	NC_006591.3	21969715	21969876	162	plus	Exon	4	NC_009154.2	21934275	21934436	162	plus
	Intron	4	NC_000017.11	40700124	40700221	98	minus		Intron	4	NC_006591.3	21969877	21969974	98	plus	Intron	4	NC_009154.2	21934437	21934533	97	plus
	Exon	5	NC_000017.11	40699998	40700123	126	minus		Exon	5	NC_006591.3	21969975	21970100	126	plus	Exon	5	NC_009154.2	21934534	21934659	126	plus
	Intron	5	NC_000017.11	40699662	40699997	336	minus		Intron	5	NC_006591.3	21970101	21970444	344	plus	Intron	5	NC_009154.2	21934660	21935011	352	plus
	Exon	6	NC_000017.11	40699444	40699661	218	minus		Exon	6	NC_006591.3	21970445	21970662	218	plus	Exon	6	NC_009154.2	21935012	21935229	218	plus
	Intron	6	NC_000017.11	40698651	40699443	793	minus		Intron	6	NC_006591.3	21970663	21971041	379	plus	Intron	6	NC_009154.2	21935230	21935421	192	plus
	Exon	7	NC_000017.11	40698538	40698650	113	minus		Exon	7	NC_006591.3	21971042	21971172	131	plus	Exon	7	NC_009154.2	21935422	21935534	113	plus
	Intron	7	NC_000017.11	40698341	40698537	197	minus		Intron	7	NC_006591.3	21971173	21971557	385	plus	Intron	7	NC_009154.2	21935535	21935987	453	plus
	Exon	8 CDS	NC_000017.11	40698237	40698340	104	minus		Exon	8 CDS	NC_006591.3	21971558	21971661	104	plus	Exon	8 CDS	NC_009154.2	21935988	21936091	104	plus
	Exon	8 UTR	NC_000017.11	40697991	40698236	246	minus		Exon	8 UTR	NC_006591.3	21971662	21971901	240	plus	Exon	8 UTR	NC_009154.2	21936092	21936218	127	plus
	Total size (bp)					5760			Total size (bp)					4798		Total size (bp)					4203
	Number of amino acids					525			Number of amino acids					541		Number of amino acids					506
KRT25	Feature	Feature #	Human Chr	Human Start	Human Stop	Size	Orientation	Human Accession	Feature	Feature #	Dog Chr	Dog Start	Dog Stop	Size	Orientation	Feature	Feature #	Horse Chr	Horse Start	Horse Stop	Size	Orientation
	Exon	1 UTR	NC_000017.11	40755272	40755332	61	minus	NM_181534.3	Exon	1 UTR	NC_006591.3	21940421	21940538	118	plus	Exon	1 UTR	NC_009154.2	21890850	21890894	45	plus
	Exon	1 CDS	NC_000017.11	40754843	40755271	429	minus		Exon	1 CDS	NC_006591.3	21940539	21940967	429	plus	Exon	1 CDS	NC_009154.2	21890895	21891323	429	plus
	Intron	1	NC_000017.11	40754469	40754842	374	minus		Intron	1	NC_006591.3	21940968	21941470	503	plus	Intron	1	NC_009154.2	21891324	21891633	310	plus
	Exon	2	NC_000017.11	40754386	40754468	83	minus		Exon	2	NC_006591.3	21941471	21941553	83	plus	Exon	2	NC_009154.2	21891634	21891716	83	plus
	Intron	2	NC_000017.11	40754017	40754385	369	minus		Intron	2	NC_006591.3	21941554	21941979	426	plus	Intron	2	NC_009154.2	21891717	21892111	395	plus
	Exon	3	NC_000017.11	40753860	40754016	157	minus		Exon	3	NC_006591.3	21941980	21942136	157	plus	Exon	3	NC_009154.2	21892112	21892268	157	plus
	Intron	3	NC_000017.11	40751327	40753859	2533	minus		Intron	3	NC_006591.3	21942137	21944639	2503	plus	Intron	3	NC_009154.2	21892269	21894467	2199	plus
	Exon	4	NC_000017.11	40751165	40751326	162	minus		Exon	4	NC_006591.3	21944640	21944801	162	plus	Exon	4	NC_009154.2	21894468	21894629	162	plus
	Intron	4	NC_000017.11	40751080	40751164	85	minus		Intron	4	NC_006591.3	21944802	21944884	83	plus	Intron	4	NC_009154.2	21894630	21894713	84	plus
	Exon	5	NC_000017.11	40750954	40751079	126	minus		Exon	5	NC_006591.3	21944885	21945010	126	plus	Exon	5	NC_009154.2	21894714	21894839	126	plus
	Intron	5	NC_000017.11	40750598	40750953	356	minus		Intron	5	NC_006591.3	21945011	21945400	390	plus	Intron	5	NC_009154.2	21894840	21895198	359	plus
	Exon	6	NC_000017.11	40750380	40750597	218	minus		Exon	6	NC_006591.3	21945401	21945618	218	plus	Exon	6	NC_009154.2	21895199	21895416	218	plus
	Intron	6	NC_000017.11	40749326	40750379	1054	minus		Intron	6	NC_006591.3	21945619	21946219	601	plus	Intron	6	NC_009154.2	21895417	21895787	371	plus
	Exon	7	NC_000017.11	40749258	40749325	68	minus		Exon	7	NC_006591.3	21946220	21946287	68	plus	Exon	7	NC_009154.2	21895788	21895855	68	plus
	Intron	7	NC_000017.11	40748387	40749257	871	minus		Intron	7	NC_006591.3	21946288	21947113	826	plus	Intron	7	NC_009154.2	21895856	21896672	817	plus
	Exon	8 CDS	NC_000017.11	40748277	40748386	110	minus		Exon	8 CDS	NC_006591.3	21947114	21947223	110	plus	Exon	8 CDS	NC_009154.2	21896673	21896782	110	plus
	Exon	8 UTR	NC_000017.11	40748021	40748276	256	minus		Exon	8 UTR	NC_006591.3	21947224	21947487	264	plus	Exon	8 UTR	NC_009154.2	21896783	21896850	68	plus
	Total size (bp)					7312			Total size (bp)					7067		Total size (bp)					6001
	Number of amino acids					450			Number of amino acids					450		Number of amino acids					450
KRT26 (horse LOC100067606)	Feature	Feature #	Human Chr	Human Start	Human Stop	Size	Orientation	Human Accession	Feature	Feature #	Dog Chr	Dog Start	Dog Stop	Size	Orientation	Feature	Feature #	Horse Chr	Horse Start	Horse Stop	Size	Orientation
	Exon	1 UTR	NC_000017.11	40772114	40772159	46	minus	NM_181539	Exon	1 UTR	NC_006591.3	21924248	21924296	49	plus	Exon	1 UTR	NC_009154.2	21878532	21878581	50	plus
	Exon	1 CDS	NC_000017.11	40771673	40772113	441	minus		Exon	1 CDS	NC_006591.3	21924297	21924725	429	plus	Exon	1 CDS	NC_009154.2	21878582	21879022	441	plus
	Intron	1	NC_000017.11	40771237	40771672	436	minus		Intron	1	NC_006591.3	21924726	21925378	653	plus	Intron	1	NC_009154.2	21879023	21879475	453	plus
	Exon	2	NC_000017.11	40771154	40771236	83	minus		Exon	2	NC_006591.3	21925379	21925461	83	plus	Exon	2	NC_009154.2	21879476	21879558	83	plus
	Intron	2	NC_000017.11	40770410	40771153	744	minus		Intron	2	NC_006591.3	21925462	21925847	386	plus	Intron	2	NC_009154.2	21879559	21880149	591	plus
	Exon	3	NC_000017.11	40770253	40770409	157	minus		Exon	3	NC_006591.3	21925848	21926004	157	plus	Exon	3	NC_009154.2	21880150	21880306	157	plus
	Intron	3	NC_000017.11	40770123	40770252	130	minus		Intron	3	NC_006591.3	21926005	21926135	131	plus	Intron	3	NC_009154.2	21880307	21880436	130	plus
	Exon	4	NC_000017.11	40769961	40770122	162	minus		Exon	4	NC_006591.3	21926136	21926297	162	plus	Exon	4	NC_009154.2	21880437	21880598	162	plus
	Intron	4	NC_000017.11	40769880	40769960	81	minus		Intron	4	NC_006591.3	21926298	21926405	108	plus	Intron	4	NC_009154.2	21880599	21880682	84	plus
	Exon	5	NC_000017.11	40769754	40769879	126	minus		Exon	5	NC_006591.3	21926406	21926531	126	plus	Exon	5	NC_009154.2	21880683	21880808	126	plus
	Intron	5	NC_000017.11	40769097	40769753	657	minus		Intron	5	NC_006591.3	21926532	21926908	377	plus	Intron	5	NC_009154.2	21880809	21881183	375	plus
	Exon	6	NC_000017.11	40768879	40769096	218	minus		Exon	6	NC_006591.3	21926909	21927126	218	plus	Exon	6	NC_009154.2	21881184	21881401	218	plus
	Intron	6	NC_000017.11	40767654	40768878	1225	minus		Intron	6	NC_006591.3	21927127	21928554	1428	plus	Intron	6	NC_009154.2	21881402	21882640	1239	plus
	Exon	7	NC_000017.11	40767586	40767653	68	minus		Exon	7	NC_006591.3	21928555	21928622	68	plus	Exon	7	NC_009154.2	21882641	21882708	68	plus
	Intron	7	NC_000017.11	40766667	40767585	919	minus		Intron	7	NC_006591.3	21928623	21929378	756	plus	Intron	7	NC_009154.2	21882709	21883314	606	plus
	Exon	8 CDS	NC_000017.11	40766515	40766666	152	minus		Exon	8 CDS	NC_006591.3	21929379	21929530	152	plus	Exon	8 CDS	NC_009154.2	21883315	21883469	155	plus
	Exon	8 UTR	NC_000017.11	40766238	40766514	277	minus		Exon	8 UTR	NC_006591.3	21929531	21929809	279	plus	Exon	8 UTR	NC_009154.2	21883470	21883700	231	plus
	Total size (bp)					5922			Total size (bp)					5562		Total size (bp)					5169
	Number of amino acids					468			Number of amino acids					464		Number of amino acids					469
KRT27	Feature	Feature #	Human Chr	Human Start	Human Stop	Size	Orientation	Human Accession	Feature	Feature #	Dog Chr	Dog Start	Dog Stop	Size	Orientation	Feature	Feature #	Horse Chr	Horse Start	Horse Stop	Size	Orientation
	Exon	1 UTR	NC_000017.11	40782494	40782534	41	minus	NM_181537.3	Exon	1 UTR	NC_006591.3	21899576	21899623	48	plus	Exon	1 UTR	NC_009154.2	21866738	21866778	41	plus
	Exon	1 CDS	NC_000017.11	40782050	40782493	444	minus		Exon	1 CDS	NC_006591.3	21899624	21900025	402	plus	Exon	1 CDS	NC_009154.2	21866779	21867222	444	plus
	Intron	1	NC_000017.11	40781271	40782049	779	minus		Intron	1	NC_006591.3	21900026	21900500	475	plus	Intron	1	NC_009154.2	21867223	21867706	484	plus
	Exon	2	NC_000017.11	40781188	40781270	83	minus		Exon	2	NC_006591.3	21900501	21900583	83	plus	Exon	2	NC_009154.2	21867707	21867789	83	plus
	Intron	2	NC_000017.11	40780457	40781187	731	minus		Intron	2	NC_006591.3	21900584	21900899	316	plus	Intron	2	NC_009154.2	21867790	21868154	365	plus
	Exon	3	NC_000017.11	40780300	40780456	157	minus		Exon	3	NC_006591.3	21900900	21901056	157	plus	Exon	3	NC_009154.2	21868155	21868311	157	plus
	Intron	3	NC_000017.11	40779862	40780299	438	minus		Intron	3	NC_006591.3	21901057	21901958	902	plus	Intron	3	NC_009154.2	21868312	21868580	269	plus
	Exon	4	NC_000017.11	40779700	40779861	162	minus		Exon	4	NC_006591.3	21901959	21902120	162	plus	Exon	4	NC_009154.2	21868581	21868742	162	plus
	Intron	4	NC_000017.11	40779628	40779699	72	minus		Intron	4	NC_006591.3	21902121	21902214	94	plus	Intron	4	NC_009154.2	21868743	21868821	79	plus
	Exon	5	NC_000017.11	40779502	40779627	126	minus		Exon	5	NC_006591.3	21902215	21902340	126	plus	Exon	5	NC_009154.2	21868822	21868947	126	plus
	Intron	5	NC_000017.11	40777733	40779501	1769	minus		Intron	5	NC_006591.3	21902341	21903934	1594	plus	Intron	5	NC_009154.2	21868948	21870589	1642	plus
	Exon	6	NC_000017.11	40777515	40777732	218	minus		Exon	6	NC_006591.3	21903935	21904152	218	plus	Exon	6	NC_009154.2	21870590	21870807	218	plus
	Intron	6	NC_000017.11	40777303	40777514	212	minus		Intron	6	NC_006591.3	21904153	21904367	215	plus	Intron	6	NC_009154.2	21870808	21871025	218	plus
	Exon	7	NC_000017.11	40777253	40777302	50	minus		Exon	7	NC_006591.3	21904368	21904417	50	plus	Exon	7	NC_009154.2	21871026	21871075	50	plus
	Intron	7	NC_000017.11	40777139	40777252	114	minus		Intron	7	NC_006591.3	21904418	21904544	127	plus	Intron	7	NC_009154.2	21871076	21871194	119	plus
	Exon	8 CDS	NC_000017.11	40776999	40777138	140	minus		Exon	8 CDS	NC_006591.3	21904545	21904687	143	plus	Exon	8 CDS	NC_009154.2	21871195	21871337	143	plus
	Exon	8 UTR	NC_000017.11	40776808	40776998	191	minus		Exon	8 UTR	NC_006591.3	21904688	21904864	177	plus	Exon	8 UTR	NC_009154.2	21871338	21871514	177	plus
	Total size (bp)					5727			Total size (bp)					5289		Total size (bp)					4777
	Number of amino acids					459			Number of amino acids					446		Number of amino acids					460
KRT28 (horse LOC100067557)	Feature	Feature #	Human Chr	Human Start	Human Stop	Size	Orientation	Human Accession	Feature	Feature #	Dog Chr	Dog Start	Dog Stop	Size	Orientation	Feature	Feature #	Horse Chr	Horse Start	Horse Stop	Size	Orientation
	Exon	1 UTR	NC_000017.11	40799894	40799959	66	minus	NM_181535.3	Exon	1 UTR	NC_006591.3	21876428	21876475	48	plus	Exon	1 UTR	NC_009154.2	21847208	21847271	64	plus
	Exon	1 CDS	NC_000017.11	40799444	40799893	450	minus		Exon	1 CDS	NC_006591.3	21876476	21876925	450	plus	Exon	1 CDS	NC_009154.2	21847272	21847721	450	plus
	Intron	1	NC_000017.11	40799000	40799443	444	minus		Intron	1	NC_006591.3	21876926	21877569	644	plus	Intron	1	NC_009154.2	21847722	21848167	446	plus
	Exon	2	NC_000017.11	40798917	40798999	83	minus		Exon	2	NC_006591.3	21877570	21877652	83	plus	Exon	2	NC_009154.2	21848168	21848250	83	plus
	Intron	2	NC_000017.11	40798392	40798916	525	minus		Intron	2	NC_006591.3	21877653	21878188	536	plus	Intron	2	NC_009154.2	21848251	21848811	561	plus
	Exon	3	NC_000017.11	40798235	40798391	157	minus		Exon	3	NC_006591.3	21878189	21878345	157	plus	Exon	3	NC_009154.2	21848812	21848968	157	plus
	Intron	3	NC_000017.11	40797282	40798234	953	minus		Intron	3	NC_006591.3	21878346	21879456	1111	plus	Intron	3	NC_009154.2	21848969	21851019	2051	plus
	Exon	4	NC_000017.11	40797120	40797281	162	minus		Exon	4	NC_006591.3	21879457	21879618	162	plus	Exon	4	NC_009154.2	21851020	21851181	162	plus
	Intron	4	NC_000017.11	40797042	40797119	78	minus		Intron	4	NC_006591.3	21879619	21879696	78	plus	Intron	4	NC_009154.2	21851182	21851261	80	plus
	Exon	5	NC_000017.11	40796916	40797041	126	minus		Exon	5	NC_006591.3	21879697	21879822	126	plus	Exon	5	NC_009154.2	21851262	21851387	126	plus
	Intron	5	NC_000017.11	40794047	40796915	2869	minus		Intron	5	NC_006591.3	21879823	21882853	3031	plus	Intron	5	NC_009154.2	21851388	21854226	2839	plus
	Exon	6	NC_000017.11	40793829	40794046	218	minus		Exon	6	NC_006591.3	21882854	21883071	218	plus	Exon	6	NC_009154.2	21854227	21854444	218	plus
	Intron	6	NC_000017.11	40793211	40793828	618	minus		Intron	6	NC_006591.3	21883072	21884906	1835	plus	Intron	6	NC_009154.2	21854445	21855169	725	plus
	Exon	7	NC_000017.11	40793155	40793210	56	minus		Exon	7	NC_006591.3	21884907	21884962	56	plus	Exon	7	NC_009154.2	21855170	21855225	56	plus
	Intron	7	NC_000017.11	40792570	40793154	585	minus		Intron	7	NC_006591.3	21884963	21885238	276	plus	Intron	7	NC_009154.2	21855226	21855507	282	plus
	Exon	8 CDS	NC_000017.11	40792427	40792569	143	minus		Exon	8 CDS	NC_006591.3	21885239	21885381	143	plus	Exon	8 CDS	NC_009154.2	21855508	21855650	143	plus
	Exon	8 UTR	NC_000017.11	40792196	40792426	231	minus		Exon	8 UTR	NC_006591.3	21885382	21885637	256	plus	Exon	8 UTR	NC_009154.2	21855651	21855836	186	plus
	Total size (bp)					7764			Total size (bp)					9210		Total size (bp)					8629
	Number of amino acids					464			Number of amino acids					464		Number of amino acids					464
KRT31 (dog LOC490988; horse LOC100066836)	Feature	Feature #	Human Chr	Human Start	Human Stop	Size	Orientation	Human Accession	Feature	Feature #	Dog Chr	Dog Start	Dog Stop	Size	Orientation	Feature	Feature #	Horse Chr	Horse Start	Horse Stop	Size	Orientation
	Exon	1 UTR	NC_000017.11	41397540	41397592	53	minus	NM_002277.2	Exon	1 UTR	NC_006591.3	21365047	21365090	44	plus	Exon	1 UTR	NC_009154.2	21347082	21347096	15	plus
	Exon	1 CDS	NC_000017.11	41397192	41397539	348	minus		Exon	1 CDS	NC_006591.3	21365091	21365438	348	plus	Exon	1 CDS	NC_009154.2	21347097	21347444	348	plus
	Intron	1	NC_000017.11	41396996	41397191	196	minus		Intron	1	NC_006591.3	21365439	21365641	203	plus	Intron	1	NC_009154.2	21347445	21347627	183	plus
	Exon	2	NC_000017.11	41396913	41396995	83	minus		Exon	2	NC_006591.3	21365642	21365724	83	plus	Exon	2	NC_009154.2	21347628	21347710	83	plus
	Intron	2	NC_000017.11	41396577	41396912	336	minus		Intron	2	NC_006591.3	21365725	21366065	341	plus	Intron	2	NC_009154.2	21347711	21348073	363	plus
	Exon	3	NC_000017.11	41396420	41396576	157	minus		Exon	3	NC_006591.3	21366066	21366222	157	plus	Exon	3	NC_009154.2	21348074	21348230	157	plus
	Intron	3	NC_000017.11	41395624	41396419	796	minus		Intron	3	NC_006591.3	21366223	21367000	778	plus	Intron	3	NC_009154.2	21348231	21349019	789	plus
	Exon	4	NC_000017.11	41395462	41395623	162	minus		Exon	4	NC_006591.3	21367001	21367162	162	plus	Exon	4	NC_009154.2	21349020	21349181	162	plus
	Intron	4	NC_000017.11	41395371	41395461	91	minus		Intron	4	NC_006591.3	21367163	21367256	94	plus	Intron	4	NC_009154.2	21349182	21349275	94	plus
	Exon	5	NC_000017.11	41395245	41395370	126	minus		Exon	5	NC_006591.3	21367257	21367382	126	plus	Exon	5	NC_009154.2	21349276	21349401	126	plus
	Intron	5	NC_000017.11	41395069	41395244	176	minus		Intron	5	NC_006591.3	21367383	21367487	105	plus	Intron	5	NC_009154.2	21349402	21349579	178	plus
	Exon	6	NC_000017.11	41394848	41395068	221	minus		Exon	6	NC_006591.3	21367488	21367708	221	plus	Exon	6	NC_009154.2	21349580	21349800	221	plus
	Intron	6	NC_000017.11	41394170	41394847	678	minus		Intron	6	NC_006591.3	21367709	21368328	620	plus	Intron	6	NC_009154.2	21349801	21350458	658	plus
	Exon	7 CDS	NC_000017.11	41394016	41394169	154	minus		Exon	7 CDS	NC_006591.3	21368329	21368461	133	plus	Exon	7 CDS	NC_009154.2	21350459	21350612	154	plus
	Exon	7 UTR	NC_000017.11	41393724	41394015	292	minus		Exon	7 UTR	NC_006591.3	21368462	21368743	282	plus	Exon	7 UTR	NC_009154.2	21350613	21350883	271	plus
	Total size (bp)					3869			Total size (bp)					3697		Total size (bp)					3802
	Number of amino acids					416			Number of amino acids					409		Number of amino acids					416
KRT32	Feature	Feature #	Human Chr	Human Start	Human Stop	Size	Orientation	Human Accession	Feature	Feature #	Dog Chr	Dog Start	Dog Stop	Size	Orientation	Feature	Feature #	Horse Chr	Horse Start	Horse Stop	Size	Orientation
	Exon	1 UTR	NC_000017.11	41467326	41467386	61	minus	NM_002278.3	Exon	1 UTR	NC_006591.3	21300148	21300186	39	plus	Exon	1 UTR	NC_009154.2	21304692	21304729	38	plus
	Exon	1 CDS	NC_000017.11	41466858	41467325	468	minus		Exon	1 CDS	NC_006591.3	21300187	21300654	468	plus	Exon	1 CDS	NC_009154.2	21304730	21305197	468	plus
	Intron	1	NC_000017.11	41466177	41466857	681	minus		Intron	1	NC_006591.3	21300655	21301317	663	plus	Intron	1	NC_009154.2	21305198	21305874	677	plus
	Exon	2	NC_000017.11	41466094	41466176	83	minus		Exon	2	NC_006591.3	21301318	21301400	83	plus	Exon	2	NC_009154.2	21305875	21305957	83	plus
	Intron	2	NC_000017.11	41465930	41466093	164	minus		Intron	2	NC_006591.3	21301401	21301561	161	plus	Intron	2	NC_009154.2	21305958	21306122	165	plus
	Exon	3	NC_000017.11	41465773	41465929	157	minus		Exon	3	NC_006591.3	21301562	21301718	157	plus	Exon	3	NC_009154.2	21306123	21306279	157	plus
	Intron	3	NC_000017.11	41464444	41465772	1329	minus		Intron	3	NC_006591.3	21301719	21302972	1254	plus	Intron	3	NC_009154.2	21306280	21307547	1268	plus
	Exon	4	NC_000017.11	41464282	41464443	162	minus		Exon	4	NC_006591.3	21302973	21303134	162	plus	Exon	4	NC_009154.2	21307548	21307709	162	plus
	Intron	4	NC_000017.11	41464204	41464281	78	minus		Intron	4	NC_006591.3	21303135	21303215	81	plus	Intron	4	NC_009154.2	21307710	21307798	89	plus
	Exon	5	NC_000017.11	41464078	41464203	126	minus		Exon	5	NC_006591.3	21303216	21303341	126	plus	Exon	5	NC_009154.2	21307799	21307924	126	plus
	Intron	5	NC_000017.11	41463051	41464077	1027	minus		Intron	5	NC_006591.3	21303342	21304047	706	plus	Intron	5	NC_009154.2	21307925	21308646	722	plus
	Exon	6	NC_000017.11	41462830	41463050	221	minus		Exon	6	NC_006591.3	21304048	21304268	221	plus	Exon	6	NC_009154.2	21308647	21308867	221	plus
	Intron	6	NC_000017.11	41460240	41462829	2590	minus		Intron	6	NC_006591.3	21304269	21306142	1874	plus	Intron	6	NC_009154.2	21308868	21310780	1913	plus
	Exon	7 CDS	NC_000017.11	41460110	41460239	130	minus		Exon	7 CDS	NC_006591.3	21306143	21306272	130	plus	Exon	7 CDS	NC_009154.2	21310781	21310910	130	plus
	Exon	7 UTR	NC_000017.11	41459513	41460109	597	minus		Exon	7 UTR	NC_006591.3	21306273	21306580	308	plus	Exon	7 UTR	NC_009154.2	21310911	21311245	335	plus
	Total size (bp)					7874			Total size (bp)					6433		Total size (bp)					6554
	Number of amino acids					448			Number of amino acids					448		Number of amino acids					448
KRT33A (horse LOC100066898)	Feature	Feature #	Human Chr	Human Start	Human Stop	Size	Orientation	Human Accession	Feature	Feature #	Dog Chr	Dog Start	Dog Stop	Size	Orientation	Feature	Feature #	Horse Chr	Horse Start	Horse Stop	Size	Orientation
	Exon	1 UTR	NC_000017.11	41350768	41350812	45	minus	NM_004138.3	Exon	1 UTR	NC_006591.3	21413472	21413519	48	plus	Exon	1 UTR	NC_009154.2	21383927	21383938	12	plus
	Exon	1 CDS	NC_000017.11	41350420	41350767	348	minus		Exon	1 CDS	NC_006591.3	21413520	21413867	348	plus	Exon	1 CDS	NC_009154.2	21383939	21384286	348	plus
	Intron	1	NC_000017.11	41349429	41350419	991	minus		Intron	1	NC_006591.3	21413868	21414978	1111	plus	Intron	1	NC_009154.2	21384287	21385307	1021	plus
	Exon	2	NC_000017.11	41349346	41349428	83	minus		Exon	2	NC_006591.3	21414979	21415061	83	plus	Exon	2	NC_009154.2	21385308	21385390	83	plus
	Intron	2	NC_000017.11	41348640	41349345	706	minus		Intron	2	NC_006591.3	21415062	21415598	537	plus	Intron	2	NC_009154.2	21385391	21385898	508	plus
	Exon	3	NC_000017.11	41348483	41348639	157	minus		Exon	3	NC_006591.3	21415599	21415755	157	plus	Exon	3	NC_009154.2	21385899	21386055	157	plus
	Intron	3	NC_000017.11	41347223	41348482	1260	minus		Intron	3	NC_006591.3	21415756	21416971	1216	plus	Intron	3	NC_009154.2	21386056	21387282	1227	plus
	Exon	4	NC_000017.11	41347061	41347222	162	minus		Exon	4	NC_006591.3	21416972	21417133	162	plus	Exon	4	NC_009154.2	21387283	21387444	162	plus
	Intron	4	NC_000017.11	41346970	41347060	91	minus		Intron	4	NC_006591.3	21417134	21417227	94	plus	Intron	4	NC_009154.2	21387445	21387538	94	plus
	Exon	5	NC_000017.11	41346844	41346969	126	minus		Exon	5	NC_006591.3	21417228	21417353	126	plus	Exon	5	NC_009154.2	21387539	21387664	126	plus
	Intron	5	NC_000017.11	41346669	41346843	175	minus		Intron	5	NC_006591.3	21417354	21417477	124	plus	Intron	5	NC_009154.2	21387665	21387843	179	plus
	Exon	6	NC_000017.11	41346448	41346668	221	minus		Exon	6	NC_006591.3	21417478	21417698	221	plus	Exon	6	NC_009154.2	21387844	21388064	221	plus
	Intron	6	NC_000017.11	41346237	41346447	211	minus		Intron	6	NC_006591.3	21417699	21417910	212	plus	Intron	6	NC_009154.2	21388065	21388276	212	plus
	Exon	7 CDS	NC_000017.11	41346119	41346236	118	minus		Exon	7 CDS	NC_006591.3	21417911	21418028	118	plus	Exon	7 CDS	NC_009154.2	21388277	21388394	118	plus
	Exon	7 UTR	NC_000017.11	41346092	41346118	27	minus		Exon	7 UTR	NC_006591.3	21418029	21418494	466	plus	Exon	7 UTR	NC_009154.2	21388395	21388851	457	plus
	Total size (bp)					4721			Total size (bp)					5023		Total size (bp)					4925
	Number of amino acids					404			Number of amino acids					404		Number of amino acids					404
KRT33B (dog LOC607876; horse LOC100066876)	Feature	Feature #	Human Chr	Human Start	Human Stop	Size	Orientation	Human Accession	Feature	Feature #	Dog Chr	Dog Start	Dog Stop	Size	Orientation	Feature	Feature #	Horse Chr	Horse Start	Horse Stop	Size	Orientation
	Exon	1 UTR	NC_000017.11	41369751	41369800	50	minus	NM_002279.4	Exon	1 UTR	NC_006591.3	21394040	21394084	45	plus	Exon	1 UTR	NC_009154.2	21369617	21369667	51	plus
	Exon	1 CDS	NC_000017.11	41369403	41369750	348	minus		Exon	1 CDS	NC_006591.3	21394085	21394432	348	plus	Exon	1 CDS	NC_009154.2	21369668	21370015	348	plus
	Intron	1	NC_000017.11	41367991	41369402	1412	minus		Intron	1	NC_006591.3	21394433	21395849	1417	plus	Intron	1	NC_009154.2	21370016	21371520	1505	plus
	Exon	2	NC_000017.11	41367908	41367990	83	minus		Exon	2	NC_006591.3	21395850	21395932	83	plus	Exon	2	NC_009154.2	21371521	21371603	83	plus
	Intron	2	NC_000017.11	41366627	41367907	1281	minus		Intron	2	NC_006591.3	21395933	21397367	1435	plus	Intron	2	NC_009154.2	21371604	21372583	980	plus
	Exon	3	NC_000017.11	41366470	41366626	157	minus		Exon	3	NC_006591.3	21397368	21397524	157	plus	Exon	3	NC_009154.2	21372584	21372740	157	plus
	Intron	3	NC_000017.11	41365554	41366469	916	minus		Intron	3	NC_006591.3	21397525	21398440	916	plus	Intron	3	NC_009154.2	21372741	21373631	891	plus
	Exon	4	NC_000017.11	41365392	41365553	162	minus		Exon	4	NC_006591.3	21398441	21398602	162	plus	Exon	4	NC_009154.2	21373632	21373793	162	plus
	Intron	4	NC_000017.11	41365301	41365391	91	minus		Intron	4	NC_006591.3	21398603	21398696	94	plus	Intron	4	NC_009154.2	21373794	21373887	94	plus
	Exon	5	NC_000017.11	41365175	41365300	126	minus		Exon	5	NC_006591.3	21398697	21398822	126	plus	Exon	5	NC_009154.2	21373888	21374013	126	plus
	Intron	5	NC_000017.11	41365000	41365174	175	minus		Intron	5	NC_006591.3	21398823	21398946	124	plus	Intron	5	NC_009154.2	21374014	21374192	179	plus
	Exon	6	NC_000017.11	41364779	41364999	221	minus		Exon	6	NC_006591.3	21398947	21399167	221	plus	Exon	6	NC_009154.2	21374193	21374413	221	plus
	Intron	6	NC_000017.11	41363954	41364778	825	minus		Intron	6	NC_006591.3	21399168	21399952	785	plus	Intron	6	NC_009154.2	21374414	21375227	814	plus
	Exon	7 CDS	NC_000017.11	41363836	41363953	118	minus		Exon	7 CDS	NC_006591.3	21399953	21400079	127	plus	Exon	7 CDS	NC_009154.2	21375228	21375345	118	plus
	Exon	7 UTR	NC_000017.11	41363494	41363835	342	minus		Exon	7 UTR	NC_006591.3	21400080	21400424	345	plus	Exon	7 UTR	NC_009154.2	21375346	21375689	344	plus
	Total size (bp)					6307			Total size (bp)					6385		Total size (bp)					6073
	Number of amino acids					404			Number of amino acids					407		Number of amino acids					404
KRT34 (dog LOC490989; horse LOC100066856)	Feature	Feature #	Human Chr	Human Start	Human Stop	Size	Orientation	Human Accession	Feature	Feature #	Dog Chr	Dog Start	Dog Stop	Size	Orientation	Feature	Feature #	Horse Chr	Horse Start	Horse Stop	Size	Orientation
	Exon	1 UTR	NC_000017.11	41382373	41382384	12	minus	NM_021013.3	Exon	1 UTR	NC_006591.3	21377218	21377263	46	plus	Exon	1 UTR	NC_009154.2	21359596	21359648	53	plus
	Exon	1 CDS	NC_000017.11	41381899	41382372	474	minus		Exon	1 CDS	NC_006591.3	21377264	21377611	348	plus	Exon	1 CDS	NC_009154.2	21359649	21359996	348	plus
	Intron	1	NC_000017.11	41381796	41381898	103	minus		Intron	1	NC_006591.3	21377612	21377712	101	plus	Intron	1	NC_009154.2	21359997	21360101	105	plus
	Exon	2	NC_000017.11	41381713	41381795	83	minus		Exon	2	NC_006591.3	21377713	21377795	83	plus	Exon	2	NC_009154.2	21360102	21360184	83	plus
	Intron	2	NC_000017.11	41381213	41381712	500	minus		Intron	2	NC_006591.3	21377796	21378325	530	plus	Intron	2	NC_009154.2	21360185	21360713	529	plus
	Exon	3	NC_000017.11	41381056	41381212	157	minus		Exon	3	NC_006591.3	21378326	21378482	157	plus	Exon	3	NC_009154.2	21360714	21360870	157	plus
	Intron	3	NC_000017.11	41379732	41381055	1324	minus		Intron	3	NC_006591.3	21378483	21379357	875	plus	Intron	3	NC_009154.2	21360871	21361724	854	plus
	Exon	4	NC_000017.11	41379570	41379731	162	minus		Exon	4	NC_006591.3	21379358	21379519	162	plus	Exon	4	NC_009154.2	21361725	21361886	162	plus
	Intron	4	NC_000017.11	41379479	41379569	91	minus		Intron	4	NC_006591.3	21379520	21379613	94	plus	Intron	4	NC_009154.2	21361887	21361980	94	plus
	Exon	5	NC_000017.11	41379353	41379478	126	minus		Exon	5	NC_006591.3	21379614	21379739	126	plus	Exon	5	NC_009154.2	21361981	21362106	126	plus
	Intron	5	NC_000017.11	41379177	41379352	176	minus		Intron	5	NC_006591.3	21379740	21379863	124	plus	Intron	5	NC_009154.2	21362107	21362278	172	plus
	Exon	6	NC_000017.11	41378956	41379176	221	minus		Exon	6	NC_006591.3	21379864	21380084	221	plus	Exon	6	NC_009154.2	21362279	21362499	221	plus
	Intron	6	NC_000017.11	41378147	41378955	809	minus		Intron	6	NC_006591.3	21380085	21380537	453	plus	Intron	6	NC_009154.2	21362500	21362957	458	plus
	Exon	7 CDS	NC_000017.11	41378059	41378146	88	minus		Exon	7 CDS	NC_006591.3	21380538	21380622	85	plus	Exon	7 CDS	NC_009154.2	21362958	21363042	85	plus
	Exon	7 UTR	NC_000017.11	41377669	41378058	390	minus		Exon	7 UTR	NC_006591.3	21380623	21381019	397	plus	Exon	7 UTR	NC_009154.2	21363043	21363429	387	plus
	Total size (bp)					4716			Total size (bp)					3802		Total size (bp)					3834
	Number of amino acids					436			Number of amino acids					393		Number of amino acids					393
KRT35	Feature	Feature #	Human Chr	Human Start	Human Stop	Size	Orientation	Human Accession	Feature	Feature #	Dog Chr	Dog Start	Dog Stop	Size	Orientation	Feature	Feature #	Horse Chr	Horse Start	Horse Stop	Size	Orientation
	Exon	1 UTR	NC_000017.11	41481098	41481140	43	minus	NM_002280.4	Exon	1 UTR	NC_006591.3	21287695	21287846	152	plus	Exon	1 UTR	NC_009154.2	21295474	21295516	43	plus
	Exon	1 CDS	NC_000017.11	41480627	41481097	471	minus		Exon	1 CDS	NC_006591.3	21287847	21288317	471	plus	Exon	1 CDS	NC_009154.2	21295517	21295987	471	plus
	Intron	1	NC_000017.11	41479782	41480626	845	minus		Intron	1	NC_006591.3	21288318	21289210	893	plus	Intron	1	NC_009154.2	21295988	21296819	832	plus
	Exon	2	NC_000017.11	41479699	41479781	83	minus		Exon	2	NC_006591.3	21289211	21289293	83	plus	Exon	2	NC_009154.2	21296820	21296902	83	plus
	Intron	2	NC_000017.11	41479504	41479698	195	minus		Intron	2	NC_006591.3	21289294	21289485	192	plus	Intron	2	NC_009154.2	21296903	21297098	196	plus
	Exon	3	NC_000017.11	41479347	41479503	157	minus		Exon	3	NC_006591.3	21289486	21289642	157	plus	Exon	3	NC_009154.2	21297099	21297255	157	plus
	Intron	3	NC_000017.11	41478996	41479346	351	minus		Intron	3	NC_006591.3	21289643	21289764	122	plus	Intron	3	NC_009154.2	21297256	21297381	126	plus
	Exon	4	NC_000017.11	41478834	41478995	162	minus		Exon	4	NC_006591.3	21289765	21289926	162	plus	Exon	4	NC_009154.2	21297382	21297543	162	plus
	Intron	4	NC_000017.11	41478487	41478833	347	minus		Intron	4	NC_006591.3	21289927	21290214	288	plus	Intron	4	NC_009154.2	21297544	21297849	306	plus
	Exon	5	NC_000017.11	41478361	41478486	126	minus		Exon	5	NC_006591.3	21290215	21290340	126	plus	Exon	5	NC_009154.2	21297850	21297975	126	plus
	Intron	5	NC_000017.11	41477739	41478360	622	minus		Intron	5	NC_006591.3	21290341	21291678	1338	plus	Intron	5	NC_009154.2	21297976	21298478	503	plus
	Exon	6	NC_000017.11	41477518	41477738	221	minus		Exon	6	NC_006591.3	21291679	21291899	221	plus	Exon	6	NC_009154.2	21298479	21298699	221	plus
	Intron	6	NC_000017.11	41477204	41477517	314	minus		Intron	6	NC_006591.3	21291900	21292191	292	plus	Intron	6	NC_009154.2	21298700	21298985	286	plus
	Exon	7 CDS	NC_000017.11	41477056	41477203	148	minus		Exon	7 CDS	NC_006591.3	21292192	21292339	148	plus	Exon	7 CDS	NC_009154.2	21298986	21299133	148	plus
	Exon	7 UTR	NC_000017.11	41477050	41477055	6	minus		Exon	7 UTR	NC_006591.3	21292340	21292699	360	plus	Exon	7 UTR	NC_009154.2	21299134	21299475	342	plus
	Intron	7	NC_000017.11	41476943	41477049	107	minus		Total size (bp)					5005		Total size (bp)					4002
	Exon	8 UTR	NC_000017.11	41476689	41476942	254	minus		Number of amino acids					455		Number of amino acids					455
	Total size (bp)					4452
	Number of amino acids					455
KRT36	Feature	Feature #	Human Chr	Human Start	Human Stop	Size	Orientation	Human Accession	Feature	Feature #	Dog Chr	Dog Start	Dog Stop	Size	Orientation	Feature	Feature #	Horse Chr	Horse Start	Horse Stop	Size	Orientation
	Exon	1 UTR	NC_000017.11				minus	NM_003771.4	Exon	1 UTR	NC_006591.3	21278743	21278945	203	plus	Exon	1 UTR	NC_009154.2	21285674	21285847	174	plus
	Exon	1 CDS	NC_000017.11	41489406	41489864	459	minus		Exon	1 CDS	NC_006591.3	21278946	21279404	459	plus	Exon	1 CDS	NC_009154.2	21285848	21286306	459	plus
	Intron	1	NC_000017.11	41488725	41489405	681	minus		Intron	1	NC_006591.3	21279405	21280079	675	plus	Intron	1	NC_009154.2	21286307	21287017	711	plus
	Exon	2	NC_000017.11	41488642	41488724	83	minus		Exon	2	NC_006591.3	21280080	21280162	83	plus	Exon	2	NC_009154.2	21287018	21287100	83	plus
	Intron	2	NC_000017.11	41488400	41488641	242	minus		Intron	2	NC_006591.3	21280163	21280411	249	plus	Intron	2	NC_009154.2	21287101	21287358	258	plus
	Exon	3	NC_000017.11	41488243	41488399	157	minus		Exon	3	NC_006591.3	21280412	21280568	157	plus	Exon	3	NC_009154.2	21287359	21287515	157	plus
	Intron	3	NC_000017.11	41487738	41488242	505	minus		Intron	3	NC_006591.3	21280569	21281093	525	plus	Intron	3	NC_009154.2	21287516	21288068	553	plus
	Exon	4	NC_000017.11	41487576	41487737	162	minus		Exon	4	NC_006591.3	21281094	21281255	162	plus	Exon	4	NC_009154.2	21288069	21288230	162	plus
	Intron	4	NC_000017.11	41487477	41487575	99	minus		Intron	4	NC_006591.3	21281256	21281358	103	plus	Intron	4	NC_009154.2	21288231	21288334	104	plus
	Exon	5	NC_000017.11	41487351	41487476	126	minus		Exon	5	NC_006591.3	21281359	21281484	126	plus	Exon	5	NC_009154.2	21288335	21288460	126	plus
	Intron	5	NC_000017.11	41487171	41487350	180	minus		Intron	5	NC_006591.3	21281485	21281668	184	plus	Intron	5	NC_009154.2	21288461	21288632	172	plus
	Exon	6	NC_000017.11	41486950	41487170	221	minus		Exon	6	NC_006591.3	21281669	21281889	221	plus	Exon	6	NC_009154.2	21288633	21288853	221	plus
	Intron	6	NC_000017.11	41486572	41486949	378	minus		Intron	6	NC_006591.3	21281890	21282269	380	plus	Intron	6	NC_009154.2	21288854	21289283	430	plus
	Exon	7 CDS	NC_000017.11	41486376	41486571	196	minus		Exon	7 CDS	NC_006591.3	21282270	21282465	196	plus	Exon	7 CDS	NC_009154.2	21289284	21289461	178	plus
	Exon	7 UTR	NC_000017.11	41486136	41486375	240	minus		Exon	7 UTR	NC_006591.3	21282466	21282664	199	plus	Exon	7 UTR	NC_009154.2	21289462	21289619	158	plus
	Total size (bp)					3729			Total size (bp)					3922		Total size (bp)					3946
	Number of amino acids					467			Number of amino acids					467		Number of amino acids					461
KRT37 (dog LOC490989; horse LOC100066792)	Feature	Feature #	Human Chr	Human Start	Human Stop	Size	Orientation	Human Accession	Feature	Feature #	Dog Chr	Dog Start	Dog Stop	Size	Orientation	Feature	Feature #	Horse Chr	Horse Start	Horse Stop	Size	Orientation
	Exon	1 UTR	NC_000017.11	41424524	41424570	47	minus	NM_003770.4	Exon	1 UTR	NC_006591.3	21340632	21340677	46	plus	Exon	1 UTR	NC_009154.2	21322915	21322940	26	plus
	Exon	1 CDS	NC_000017.11	41424032	41424523	492	minus		Exon	1 CDS	NC_006591.3	21340678	21341169	492	plus	Exon	1 CDS	NC_009154.2	21322941	21323432	492	plus
	Intron	1	NC_000017.11	41423845	41424031	187	minus		Intron	1	NC_006591.3	21341170	21341360	191	plus	Intron	1	NC_009154.2	21323433	21323615	183	plus
	Exon	2	NC_000017.11	41423762	41423844	83	minus		Exon	2	NC_006591.3	21341361	21341443	83	plus	Exon	2	NC_009154.2	21323616	21323698	83	plus
	Intron	2	NC_000017.11	41422935	41423761	827	minus		Intron	2	NC_006591.3	21341444	21342301	858	plus	Intron	2	NC_009154.2	21323699	21324506	808	plus
	Exon	3	NC_000017.11	41422778	41422934	157	minus		Exon	3	NC_006591.3	21342302	21342458	157	plus	Exon	3	NC_009154.2	21324507	21324663	157	plus
	Intron	3	NC_000017.11	41422435	41422777	343	minus		Intron	3	NC_006591.3	21342459	21342826	368	plus	Intron	3	NC_009154.2	21324664	21325027	364	plus
	Exon	4	NC_000017.11	41422273	41422434	162	minus		Exon	4	NC_006591.3	21342827	21342988	162	plus	Exon	4	NC_009154.2	21325028	21325189	162	plus
	Intron	4	NC_000017.11	41422195	41422272	78	minus		Intron	4	NC_006591.3	21342989	21343074	86	plus	Intron	4	NC_009154.2	21325190	21325277	88	plus
	Exon	5	NC_000017.11	41422069	41422194	126	minus		Exon	5	NC_006591.3	21343075	21343200	126	plus	Exon	5	NC_009154.2	21325278	21325403	126	plus
	Intron	5	NC_000017.11	41421588	41422068	481	minus		Intron	5	NC_006591.3	21343201	21343577	377	plus	Intron	5	NC_009154.2	21325404	21325888	485	plus
	Exon	6	NC_000017.11	41421367	41421587	221	minus		Exon	6	NC_006591.3	21343578	21343798	221	plus	Exon	6	NC_009154.2	21325889	21326109	221	plus
	Intron	6	NC_000017.11	41420987	41421366	380	minus		Intron	6	NC_006591.3	21343799	21344185	387	plus	Intron	6	NC_009154.2	21326110	21326519	410	plus
	Exon	7 CDS	NC_000017.11	41420878	41420986	109	minus		Exon	7 CDS	NC_006591.3	21344186	21344267	82	plus	Exon	7 CDS	NC_009154.2	21326520	21326613	94	plus
	Exon	7 UTR	NC_000017.11	41420557	41420877	321	minus		Exon	7 UTR	NC_006591.3	21344268	21344643	376	plus	Exon	7 UTR	NC_009154.2	21326614	21326823	210	plus
	Total size (bp)					4014			Total size (bp)					4012		Total size (bp)					3909
	Number of amino acids					449			Number of amino acids					440		Number of amino acids					444
KRT38	Feature	Feature #	Human Chr	Human Start	Human Stop	Size	Orientation	Human Accession	Feature	Feature #	Dog Chr	Dog Start	Dog Stop	Size	Orientation	Feature	Feature #	Horse Chr	Horse Start	Horse Stop	Size	Orientation
	Exon	1 UTR	NC_000017.11	41440922	41441344	423	minus	NM_006771.3	Exon	1 UTR	NC_006591.3	21321346	21321397	52	plus	NA	NA	NA	NA	NA	NA	NA
	Exon	1 CDS	NC_000017.11	41440430	41440921	492	minus		Exon	1 CDS	NC_006591.3	21321398	21321889	492	plus	NA	NA	NA	NA	NA	NA	NA
	Intron	1	NC_000017.11	41440244	41440429	186	minus		Intron	1	NC_006591.3	21321890	21322080	191	plus	NA	NA	NA	NA	NA	NA	NA
	Exon	2	NC_000017.11	41440161	41440243	83	minus		Exon	2	NC_006591.3	21322081	21322163	83	plus	NA	NA	NA	NA	NA	NA	NA
	Intron	2	NC_000017.11	41439360	41440160	801	minus		Intron	2	NC_006591.3	21322164	21322953	790	plus	NA	NA	NA	NA	NA	NA	NA
	Exon	3	NC_000017.11	41439203	41439359	157	minus		Exon	3	NC_006591.3	21322954	21323110	157	plus	NA	NA	NA	NA	NA	NA	NA
	Intron	3	NC_000017.11	41438859	41439202	344	minus		Intron	3	NC_006591.3	21323111	21323479	369	plus	NA	NA	NA	NA	NA	NA	NA
	Exon	4	NC_000017.11	41438697	41438858	162	minus		Exon	4	NC_006591.3	21323480	21323641	162	plus	NA	NA	NA	NA	NA	NA	NA
	Intron	4	NC_000017.11	41438617	41438696	80	minus		Intron	4	NC_006591.3	21323642	21323727	86	plus	NA	NA	NA	NA	NA	NA	NA
	Exon	5	NC_000017.11	41438491	41438616	126	minus		Exon	5	NC_006591.3	21323728	21323853	126	plus	NA	NA	NA	NA	NA	NA	NA
	Intron	5	NC_000017.11	41438314	41438490	177	minus		Intron	5	NC_006591.3	21323854	21324228	375	plus	NA	NA	NA	NA	NA	NA	NA
	Exon	6	NC_000017.11	41438093	41438313	221	minus		Exon	6	NC_006591.3	21324229	21324449	221	plus	NA	NA	NA	NA	NA	NA	NA
	Intron	6	NC_000017.11	41437542	41438092	551	minus		Intron	6	NC_006591.3	21324450	21325115	666	plus	NA	NA	NA	NA	NA	NA	NA
	Exon	7 CDS	NC_000017.11	41437412	41437541	130	minus		Exon	7 CDS	NC_006591.3	21325116	21325248	133	plus	NA	NA	NA	NA	NA	NA	NA
	Exon	7 UTR	NC_000017.11	41436369	41437411	1043	minus		Exon	7 UTR	NC_006591.3	21325249	21326551	1303	plus	NA	NA	NA	NA	NA	NA	NA
	Total size (bp)					4976			Total size (bp)					5206		NA	NA	NA	NA	NA	NA	NA
	Number of amino acids					456			Number of amino acids					457		NA	NA	NA	NA	NA	NA	NA
KRT39	Feature	Feature #	Human Chr	Human Start	Human Stop	Size	Orientation	Human Accession	Feature	Feature #	Dog Chr	Dog Start	Dog Stop	Size	Orientation	Feature	Feature #	Horse Chr	Horse Start	Horse Stop	Size	Orientation
	Exon	1 UTR	NC_000017.11	40966857	40966892	36	minus	NM_213656.3	Exon	1 UTR	NC_006591.3	21722581	21722643	63	plus	Exon	1 UTR	NC_009154.2	21677818	21677896	79	plus
	Exon	1 CDS	NC_000017.11	40966389	40966856	468	minus		Exon	1 CDS	NC_006591.3	21722644	21723093	450	plus	Exon	1 CDS	NC_009154.2	21677897	21678364	468	plus
	Intron	1	NC_000017.11	40964529	40966388	1860	minus		Intron	1	NC_006591.3	21723094	21723952	859	plus	Intron	1	NC_009154.2	21678365	21679207	843	plus
	Exon	2	NC_000017.11	40964446	40964528	83	minus		Exon	2	NC_006591.3	21723953	21724035	83	plus	Exon	2	NC_009154.2	21679208	21679290	83	plus
	Intron	2	NC_000017.11	40963784	40964445	662	minus		Intron	2	NC_006591.3	21724036	21724806	771	plus	Intron	2	NC_009154.2	21679291	21679923	633	plus
	Exon	3	NC_000017.11	40963627	40963783	157	minus		Exon	3	NC_006591.3	21724807	21724963	157	plus	Exon	3	NC_009154.2	21679924	21680080	157	plus
	Intron	3	NC_000017.11	40962564	40963626	1063	minus		Intron	3	NC_006591.3	21724964	21725598	635	plus	Intron	3	NC_009154.2	21680081	21680732	652	plus
	Exon	4	NC_000017.11	40962402	40962563	162	minus		Exon	4	NC_006591.3	21725599	21725760	162	plus	Exon	4	NC_009154.2	21680733	21680894	162	plus
	Intron	4	NC_000017.11	40962288	40962401	114	minus		Intron	4	NC_006591.3	21725761	21725872	112	plus	Intron	4	NC_009154.2	21680895	21681006	112	plus
	Exon	5	NC_000017.11	40962162	40962287	126	minus		Exon	5	NC_006591.3	21725873	21725998	126	plus	Exon	5	NC_009154.2	21681007	21681132	126	plus
	Intron	5	NC_000017.11	40960502	40962161	1660	minus		Intron	5	NC_006591.3	21725999	21727528	1530	plus	Intron	5	NC_009154.2	21681133	21682458	1326	plus
	Exon	6	NC_000017.11	40960281	40960501	221	minus		Exon	6	NC_006591.3	21727529	21727749	221	plus	Exon	6	NC_009154.2	21682459	21682679	221	plus
	Intron	6	NC_000017.11	40958860	40960280	1421	minus		Intron	6	NC_006591.3	21727750	21729126	1377	plus	Intron	6	NC_009154.2	21682680	21684054	1375	plus
	Exon	7 CDS	NC_000017.11	40958601	40958859	259	minus		Exon	7 CDS	NC_006591.3	21729127	21729379	253	plus	Exon	7 CDS	NC_009154.2	21684055	21684316	262	plus
	Exon	7 UTR	NC_000017.11	40958417	40958600	184	minus		Exon	7 UTR	NC_006591.3	21729380	21729388	9	plus	Exon	7 UTR	NC_009154.2	21684317	21685831	1515	plus
	Total size (bp)					8476			Total size (bp)					6808		Total size (bp)					8014
	Number of amino acids					491			Number of amino acids					483		Number of amino acids					492
KRT40	Feature	Feature #	Human Chr	Human Start	Human Stop	Size	Orientation	Human Accession	Feature	Feature #	Dog Chr	Dog Start	Dog Stop	Size	Orientation	Feature	Feature #	Horse Chr	Horse Start	Horse Stop	Size	Orientation
	Exon	1 UTR	NC_000017.11	40987047	40987135	89	minus	NM_182497.3	Exon	1 UTR	NC_006591.3	21710222	21710268	47	plus	Exon	1 UTR	NC_009154.2	21665884	21665930	47	plus
	Intron	1	NC_000017.11	40986375	40987046	672	minus		Exon	1 CDS	NC_006591.3	21710269	21710715	447	plus	Exon	1 CDS	NC_009154.2	21665931	21666377	447	plus
	Exon	2 UTR	NC_000017.11	40986304	40986374	71	minus		Intron	1	NC_006591.3	21710716	21711212	497	plus	Intron	1	NC_009154.2	21666378	21667297	920	plus
	Intron		NC_000017.11	40984275	40986303	2029	minus		Exon	2	NC_006591.3	21711213	21711295	83	plus	Exon	2	NC_009154.2	21667298	21667380	83	plus
	Exon	3 UTR	NC_000017.11	40984274	40984274	1	minus		Intron	2	NC_006591.3	21711296	21711554	259	plus	Intron	2	NC_009154.2	21667381	21667638	258	plus
	Exon	3 CDS	NC_000017.11	40983827	40984273	447	minus		Exon	3	NC_006591.3	21711555	21711711	157	plus	Exon	3	NC_009154.2	21667639	21667795	157	plus
	Intron	3	NC_000017.11	40983129	40983826	698	minus		Intron	3	NC_006591.3	21711712	21712516	805	plus	Intron	3	NC_009154.2	21667796	21668979	1184	plus
	Exon	4	NC_000017.11	40983046	40983128	83	minus		Exon	4	NC_006591.3	21712517	21712678	162	plus	Exon	4	NC_009154.2	21668980	21669141	162	plus
	Intron	4	NC_000017.11	40982464	40983045	582	minus		Intron	4	NC_006591.3	21712679	21712757	79	plus	Intron	4	NC_009154.2	21669142	21669220	79	plus
	Exon	5	NC_000017.11	40982307	40982463	157	minus		Exon	5	NC_006591.3	21712758	21712883	126	plus	Exon	5	NC_009154.2	21669221	21669346	126	plus
	Intron	5	NC_000017.11	40981152	40982306	1155	minus		Intron	5	NC_006591.3	21712884	21714450	1567	plus	Intron	5	NC_009154.2	21669347	21670544	1198	plus
	Exon	6	NC_000017.11	40980990	40981151	162	minus		Exon	6	NC_006591.3	21714451	21714671	221	plus	Exon	6	NC_009154.2	21670545	21670765	221	plus
	Intron	6	NC_000017.11	40980911	40980989	79	minus		Intron	6	NC_006591.3	21714672	21715217	546	plus	Intron	6	NC_009154.2	21670766	21671285	520	plus
	Exon	7	NC_000017.11	40980785	40980910	126	minus		Exon	7 CDS	NC_006591.3	21715218	21715317	100	plus	Exon	7 CDS	NC_009154.2	21671286	21671385	100	plus
	Intron	7	NC_000017.11	40979025	40980784	1760	minus		Exon	7 UTR	NC_006591.3	21715318	21715366	49	plus	Exon	7 UTR	NC_009154.2	21671386	21671645	260	plus
	Exon	8	NC_000017.11	40978804	40979024	221	minus		Total size (bp)					5145		Total size (bp)					5762
	Intron	8	NC_000017.11	40978297	40978803	507	minus		Number of amino acids					431		Number of amino acids					431
	Exon	9 CDS	NC_000017.11	40978197	40978296	100	minus
	Exon	9 UTR	NC_000017.11	40977716	40978196	481	minus
	Total size (bp)					9420
	Number of amino acids					431
KRT41 / KRT41P (dog NCBI annotation release 103: KRT37; horse LOC100066813)	Feature	Feature #	Human Chr	Human Start	Human Stop	Size	Orientation	Human Accession	Feature	Feature #	Dog Chr	Dog Start	Dog Stop	Size	Orientation	Feature	Feature #	Horse Chr	Horse Start	Horse Stop	Size	Orientation	Horse: Frameshift in exon 1 resulting in a premature stop codon. We therefore suggest the equine gene symbol KRT41P to indicate that this is a pseudogene.
	pseudogene	1	NC_000017.11	41406039	41412699	6661	minus	NG_029330.1	Exon	1 UTR	NC_006591.3	21351649	21351687	39	plus	Exon	1 UTR	NC_009154.2	21334421	21334459	39	plus
									Exon	1 CDS	NC_006591.3	21351688	21352116	429	plus	Exon	1 CDS	NC_009154.2	21334460	21334889	430	plus
									Intron	1	NC_006591.3	21352117	21353639	1523	plus	Intron	1	NC_009154.2	21334890	21335956	1067	plus
									Exon	2	NC_006591.3	21353640	21353722	83	plus	Exon	2	NC_009154.2	21335957	21336039	83	plus
									Intron	2	NC_006591.3	21353723	21354750	1028	plus	Intron	2	NC_009154.2	21336040	21337002	963	plus
									Exon	3	NC_006591.3	21354751	21354907	157	plus	Exon	3	NC_009154.2	21337003	21337159	157	plus
									Intron	3	NC_006591.3	21354908	21355234	327	plus	Intron	3	NC_009154.2	21337160	21337485	326	plus
									Exon	4	NC_006591.3	21355235	21355396	162	plus	Exon	4	NC_009154.2	21337486	21337647	162	plus
									Intron	4	NC_006591.3	21355397	21355482	86	plus	Intron	4	NC_009154.2	21337648	21337735	88	plus
									Exon	5	NC_006591.3	21355483	21355608	126	plus	Exon	5	NC_009154.2	21337736	21337861	126	plus
									Intron	5	NC_006591.3	21355609	21355984	376	plus	Intron	5	NC_009154.2	21337862	21338243	382	plus
									Exon	6	NC_006591.3	21355985	21356205	221	plus	Exon	6	NC_009154.2	21338244	21338464	221	plus
									Intron	6	NC_006591.3	21356206	21357698	1493	plus	Intron	6	NC_009154.2	21338465	21339194	730	plus
									Exon	7 CDS	NC_006591.3	21357699	21357834	136	plus	Exon	7 CDS	NC_009154.2	21339195	21339330	136	plus
									Exon	7 UTR	NC_006591.3	21357835	21358117	283	plus	Exon	7 UTR	NC_009154.2	21339331	21341691	2361	plus
									Total size (bp)					6469		Total size (bp)					7271
									Number of amino acids					437		Number of amino acids
KRT42/KRT42P (horse LOC100066586)	Feature	Feature #	Human Chr	Human Start	Human Stop	Size	Orientation	Human Accession	Feature	Feature #	Dog Chr	Dog Start	Dog Stop	Size	Orientation	Feature	Feature #	Horse Chr	Horse Start	Horse Stop	Size	Orientation	Dog: Gap (chr9:21142794-21142905) in 5'-UTR, 5'-UTR not well supported; coordinate of start codon may be wrong.
	Exon	1 UTR	NC_000017.11	41639319	41640199	881	minus	NR_033415.1	Exon	1 UTR	NC_006591.3	21143044	21143196	153	plus	Exon	1 UTR	NC_009154.2	21153803	21153824	22	plus
	Intron	1	NC_000017.11	41638715	41639318	604	minus		Intron			21143197	21146481	3285	plus	Exon	1 CDS	NC_009154.2	21153825	21154289	465	plus
	Exon	2 UTR	NC_000017.11	41638687	41638714	28	minus		Exon	2 UTR	NC_006591.3	21146482	21146536	55	plus	Intron	1	NC_009154.2	21154290	21156642	2353	plus
	Intron	2	NC_000017.11	41635403	41638686	3284	minus		Exon	2 CDS	NC_006591.3	21146537	21146575	39	plus	Exon	2	NC_009154.2	21156643	21156725	83	plus
	Exon	3 UTR	NC_000017.11	41635293	41635402	110	minus		Intron	2	NC_006591.3	21146576	21147217	642	plus	Intron	2	NC_009154.2	21156726	21156852	127	plus
	Intron	3	NC_000017.11	41634634	41635292	659	minus		Exon	3	NC_006591.3	21147218	21147760	543	plus	Exon	3	NC_009154.2	21156853	21157009	157	plus
	Exon	4 UTR	NC_000017.11	41634536	41634633	98	minus		Intron	3	NC_006591.3	21147761	21150034	2274	plus	Intron	3	NC_009154.2	21157010	21158150	1141	plus
	Intron	4	NC_000017.11	41630631	41634535	3905	minus		Exon	4	NC_006591.3	21150035	21150117	83	plus	Exon	4	NC_009154.2	21158151	21158312	162	plus
	Exon	5 UTR	NC_000017.11	41630419	41630630	212	minus		Intron	4	NC_006591.3	21150118	21150240	123	plus	Intron	4	NC_009154.2	21158313	21158850	538	plus
	Intron	5	NC_000017.11	41629238	41630418	1181	minus		Exon	5	NC_006591.3	21150241	21150397	157	plus	Exon	5	NC_009154.2	21158851	21158976	126	plus
	Exon	6 UTR	NC_000017.11	41629076	41629237	162	minus		Intron	5	NC_006591.3	21150398	21151530	1133	plus	Intron	5	NC_009154.2	21158977	21159239	263	plus
	Intron	6	NC_000017.11	41628470	41629075	606	minus		Exon	6	NC_006591.3	21151531	21151692	162	plus	Exon	6	NC_009154.2	21159240	21159460	221	plus
	Exon	7 UTR	NC_000017.11	41628355	41628469	115	minus		Intron	6	NC_006591.3	21151693	21152291	599	plus	Intron	6	NC_009154.2	21159461	21160495	1035	plus
	Intron	7	NC_000017.11	41628107	41628354	248	minus		Exon	7	NC_006591.3	21152292	21152417	126	plus	Exon	7	NC_009154.2	21160496	21160545	50	plus
	Exon	8 UTR	NC_000017.11	41627887	41628106	220	minus		Intron	7	NC_006591.3	21152418	21152677	260	plus	Intron	7	NC_009154.2	21160546	21160657	112	plus
	Intron	8	NC_000017.11	41627763	41627886	124	minus		Exon	8	NC_006591.3	21152678	21152898	221	plus	Exon	8 CDS	NC_009154.2	21160658	21160755	98	plus
	Exon	9 UTR	NC_000017.11	41627080	41627762	683	minus		Intron	8	NC_006591.3	21152899	21153962	1064	plus	Exon	8 UTR	NC_009154.2	21160756	21160854	99	plus
	Intron	9	NC_000017.11	41626840	41627079	240	minus		Exon	9	NC_006591.3	21153963	21154012	50	plus	Total size (bp)					7052
	Exon	10 UTR	NC_000017.11	41626790	41626839	50	minus		Intron	9	NC_006591.3	21154013	21154135	123	plus	Number of amino acids					453
	Intron	10	NC_000017.11	41626632	41626789	158	minus		Exon	10 CDS	NC_006591.3	21154136	21154233	98	plus
	Exon	11 UTR	NC_000017.11	41626327	41626631	305	minus		Exon	10 UTR	NC_006591.3	21154234	21154445	212	plus
	Total size (bp)					13873			Total size (bp)					11190
	Number of amino acids								Number of amino acids					492
KRT43P	Feature	Feature #	Human Chr	Human Start	Human Stop	Size	Orientation	Human Accession	Feature	Feature #	Dog Chr	Dog Start	Dog Stop	Size	Orientation	Feature	Feature #	Horse Chr	Horse Start	Horse Stop	Size	Orientation
	pseudogene	1	NC_000017.11	41448462	41449404	943	minus	NG_026184.1	NA	NA	NA	NA	NA	NA	NA	NA	NA	NA	NA	NA	NA	NA
KRT71	Feature	Feature #	Human Chr	Human Start	Human Stop	Size	Orientation	Human Accession	Feature	Feature #	Dog Chr	Dog Start	Dog Stop	Size	Orientation	Feature	Feature #	Horse Chr	Horse Start	Horse Stop	Size	Orientation
	Exon	1 UTR	NC_000012.12	52553078	52553147	70	minus	NM_033448.2	Exon	1 UTR	NC_006609.3	2536778	2536830	53	plus	Exon	1 UTR	NC_009149.2	69655269	69655334	66	minus
	Exon	1 CDS	NC_000012.12	52552637	52553077	441	minus		Exon	1 CDS	NC_006609.3	2536831	2537277	447	plus	Exon	1 CDS	NC_009149.2	69654822	69655268	447	minus
	Intron	1	NC_000012.12	52550244	52552636	2393	minus		Intron	1	NC_006609.3	2537278	2539207	1930	plus	Intron	1	NC_009149.2	69652469	69654821	2353	minus
	Exon	2	NC_000012.12	52550029	52550243	215	minus		Exon	2	NC_006609.3	2539208	2539422	215	plus	Exon	2	NC_009149.2	69652254	69652468	215	minus
	Intron	2	NC_000012.12	52549354	52550028	675	minus		Intron	2	NC_006609.3	2539423	2540119	697	plus	Intron	2	NC_009149.2	69651551	69652253	703	minus
	Exon	3	NC_000012.12	52549293	52549353	61	minus		Exon	3	NC_006609.3	2540120	2540180	61	plus	Exon	3	NC_009149.2	69651490	69651550	61	minus
	Intron	3	NC_000012.12	52548797	52549292	496	minus		Intron	3	NC_006609.3	2540181	2540700	520	plus	Intron	3	NC_009149.2	69650978	69651489	512	minus
	Exon	4	NC_000012.12	52548701	52548796	96	minus		Exon	4	NC_006609.3	2540701	2540796	96	plus	Exon	4	NC_009149.2	69650882	69650977	96	minus
	Intron	4	NC_000012.12	52548317	52548700	384	minus		Intron	4	NC_006609.3	2540797	2541161	365	plus	Intron	4	NC_009149.2	69650522	69650881	360	minus
	Exon	5	NC_000012.12	52548152	52548316	165	minus		Exon	5	NC_006609.3	2541162	2541326	165	plus	Exon	5	NC_009149.2	69650357	69650521	165	minus
	Intron	5	NC_000012.12	52547983	52548151	169	minus		Intron	5	NC_006609.3	2541327	2541527	201	plus	Intron	5	NC_009149.2	69650170	69650356	187	minus
	Exon	6	NC_000012.12	52547857	52547982	126	minus		Exon	6	NC_006609.3	2541528	2541653	126	plus	Exon	6	NC_009149.2	69650044	69650169	126	minus
	Intron	6	NC_000012.12	52546507	52547856	1350	minus		Intron	6	NC_006609.3	2541654	2543074	1421	plus	Intron	6	NC_009149.2	69648629	69650043	1415	minus
	Exon	7	NC_000012.12	52546286	52546506	221	minus		Exon	7	NC_006609.3	2543075	2543295	221	plus	Exon	7	NC_009149.2	69648408	69648628	221	minus
	Intron	7	NC_000012.12	52545600	52546285	686	minus		Intron	7	NC_006609.3	2543296	2544133	838	plus	Intron	7	NC_009149.2	69647824	69648407	584	minus
	Exon	8	NC_000012.12	52545565	52545599	35	minus		Exon	8	NC_006609.3	2544134	2544168	35	plus	Exon	8	NC_009149.2	69647789	69647823	35	minus
	Intron	8	NC_000012.12	52544744	52545564	821	minus		Intron	8	NC_006609.3	2544169	2544891	723	plus	Intron	8	NC_009149.2	69646979	69647788	810	minus
	Exon	9 CDS	NC_000012.12	52544532	52544743	212	minus		Exon	9 CDS	NC_006609.3	2544892	2545103	212	plus	Exon	9 CDS	NC_009149.2	69646767	69646978	212	minus
	Exon	9 UTR	NC_000012.12	52543909	52544531	623	minus		Exon	9 UTR	NC_006609.3	2545104	2545661	558	plus	Exon	9 UTR	NC_009149.2	69646182	69646766	585	minus
	Total size (bp)					9239			Total size (bp)					8884		Total size (bp)					9153
	Number of amino acids					523			Number of amino acids					525		Number of amino acids					525
KRT72 (horse LOC100061693)	Feature	Feature #	Human Chr	Human Start	Human Stop	Size	Orientation	Human Accession	Feature	Feature #	Dog Chr	Dog Start	Dog Stop	Size	Orientation	Feature	Feature #	Horse Chr	Horse Start	Horse Stop	Size	Orientation	Horse: High probability for 2 erroneous single base insertions (69,692,308 & 69,692,342) in the genome reference assembly, the real length of the CDS of exon 1 is probably 462 bp
	Exon	1 UTR	NC_000012.12	52601453	52601538	86	minus	NM_080747.2	Exon	1 UTR	NC_006609.3	2494949	2494998	50	plus	Exon	1 UTR	NC_009149.2	69692567	69692607	41	minus
	Exon	1 CDS	NC_000012.12	52601027	52601452	426	minus		Exon	1 CDS	NC_006609.3	2494999	2495460	462	plus	Exon	1 CDS	NC_009149.2	69692103	69692566	464	minus
	Intron	1	NC_000012.12	52599113	52601026	1914	minus		Intron	1	NC_006609.3	2495461	2497036	1576	plus	Intron	1	NC_009149.2	69690557	69692102	1546	minus
	Exon	2	NC_000012.12	52598898	52599112	215	minus		Exon	2	NC_006609.3	2497037	2497251	215	plus	Exon	2	NC_009149.2	69690342	69690556	215	minus
	Intron	2	NC_000012.12	52592953	52598897	5945	minus		Intron	2	NC_006609.3	2497252	2500199	2948	plus	Intron	2	NC_009149.2	69686732	69690341	3610	minus
	Exon	3	NC_000012.12	52592892	52592952	61	minus		Exon	3	NC_006609.3	2500200	2500260	61	plus	Exon	3	NC_009149.2	69686671	69686731	61	minus
	Intron	3	NC_000012.12	52592492	52592891	400	minus		Intron	3	NC_006609.3	2500261	2500660	400	plus	Intron	3	NC_009149.2	69686371	69686670	300	minus
	Exon	4	NC_000012.12	52592396	52592491	96	minus		Exon	4	NC_006609.3	2500661	2500756	96	plus	Exon	4	NC_009149.2	69686275	69686370	96	minus
	Intron	4	NC_000012.12	52591629	52592395	767	minus		Intron	4	NC_006609.3	2500757	2501424	668	plus	Intron	4	NC_009149.2	69685530	69686274	745	minus
	Exon	5	NC_000012.12	52591464	52591628	165	minus		Exon	5	NC_006609.3	2501425	2501589	165	plus	Exon	5	NC_009149.2	69685365	69685529	165	minus
	Intron	5	NC_000012.12	52590962	52591463	502	minus		Intron	5	NC_006609.3	2501590	2502187	598	plus	Intron	5	NC_009149.2	69684733	69685364	632	minus
	Exon	6	NC_000012.12	52590836	52590961	126	minus		Exon	6	NC_006609.3	2502188	2502313	126	plus	Exon	6	NC_009149.2	69684607	69684732	126	minus
	Intron	6	NC_000012.12	52587852	52590835	2984	minus		Intron	6	NC_006609.3	2502314	2504691	2378	plus	Intron	6	NC_009149.2	69682237	69684606	2370	minus
	Exon	7	NC_000012.12	52587631	52587851	221	minus		Exon	7	NC_006609.3	2504692	2504912	221	plus	Exon	7	NC_009149.2	69682016	69682236	221	minus
	Intron	7	NC_000012.12	52586981	52587630	650	minus		Intron	7	NC_006609.3	2504913	2505530	618	plus	Intron	7	NC_009149.2	69681375	69682015	641	minus
	Exon	8	NC_000012.12	52586946	52586980	35	minus		Exon	8	NC_006609.3	2505531	2505565	35	plus	Exon	8	NC_009149.2	69681340	69681374	35	minus
	Intron	8	NC_000012.12	52586173	52586945	773	minus		Intron	8	NC_006609.3	2505566	2506270	705	plus	Intron	8	NC_009149.2	69680575	69681339	765	minus
	Exon	9 CDS	NC_000012.12	52585982	52586172	191	minus		Exon	9 CDS	NC_006609.3	2506271	2506461	191	plus	Exon	9 CDS	NC_009149.2	69680384	69680574	191	minus
	Exon	9 UTR	NC_000012.12	52585589	52585981	393	minus		Exon	9 UTR	NC_006609.3	2506462	2506763	302	plus	Exon	9 UTR	NC_009149.2	69680009	69680383	375	minus
	Total size (bp)					15950			Total size (bp)					11815		Total size (bp)					12599
	Number of amino acids					511			Number of amino acids					523		Number of amino acids					523.667
KRT73 (dog LOC608027; horse LOC100061725)	Feature	Feature #	Human Chr	Human Start	Human Stop	Size	Orientation	Human Accession	Feature	Feature #	Dog Chr	Dog Start	Dog Stop	Size	Orientation	Feature	Feature #	Horse Chr	Horse Start	Horse Stop	Size	Orientation
	Exon	1 UTR	NC_000012.12	52618525	52618559	35	minus	NM_175068.2	Exon	1 UTR	NC_006609.3	2477885	2477925	41	plus	Exon	1 UTR	NC_009149.2	69708566	69708612	47	minus
	Exon	1 CDS	NC_000012.12	52618078	52618524	447	minus		Exon	1 CDS	NC_006609.3	2477926	2478372	447	plus	Exon	1 CDS	NC_009149.2	69708119	69708565	447	minus
	Intron	1	NC_000012.12	52616381	52618077	1697	minus		Intron	1	NC_006609.3	2478373	2479829	1457	plus	Intron	1	NC_009149.2	69706654	69708118	1465	minus
	Exon	2	NC_000012.12	52616166	52616380	215	minus		Exon	2	NC_006609.3	2479830	2480044	215	plus	Exon	2	NC_009149.2	69706439	69706653	215	minus
	Intron	2	NC_000012.12	52615340	52616165	826	minus		Intron	2	NC_006609.3	2480045	2480851	807	plus	Intron	2	NC_009149.2	69705736	69706438	703	minus
	Exon	3	NC_000012.12	52615279	52615339	61	minus		Exon	3	NC_006609.3	2480852	2480912	61	plus	Exon	3	NC_009149.2	69705675	69705735	61	minus
	Intron	3	NC_000012.12	52614675	52615278	604	minus		Intron	3	NC_006609.3	2480913	2481563	651	plus	Intron	3	NC_009149.2	69705025	69705674	650	minus
	Exon	4	NC_000012.12	52614579	52614674	96	minus		Exon	4	NC_006609.3	2481564	2481659	96	plus	Exon	4	NC_009149.2	69704929	69705024	96	minus
	Intron	4	NC_000012.12	52613853	52614578	726	minus		Intron	4	NC_006609.3	2481660	2482452	793	plus	Intron	4	NC_009149.2	69704186	69704928	743	minus
	Exon	5	NC_000012.12	52613688	52613852	165	minus		Exon	5	NC_006609.3	2482453	2482617	165	plus	Exon	5	NC_009149.2	69704021	69704185	165	minus
	Intron	5	NC_000012.12	52611330	52613687	2358	minus		Intron	5	NC_006609.3	2482618	2485140	2523	plus	Intron	5	NC_009149.2	69701386	69704020	2635	minus
	Exon	6	NC_000012.12	52611204	52611329	126	minus		Exon	6	NC_006609.3	2485141	2485266	126	plus	Exon	6	NC_009149.2	69701260	69701385	126	minus
	Intron	6	NC_000012.12	52610836	52611203	368	minus		Intron	6	NC_006609.3	2485267	2485659	393	plus	Intron	6	NC_009149.2	69700884	69701259	376	minus
	Exon	7	NC_000012.12	52610615	52610835	221	minus		Exon	7	NC_006609.3	2485660	2485880	221	plus	Exon	7	NC_009149.2	69700663	69700883	221	minus
	Intron	7	NC_000012.12	52609282	52610614	1333	minus		Intron	7	NC_006609.3	2485881	2486848	968	plus	Intron	7	NC_009149.2	69699660	69700662	1003	minus
	Exon	8	NC_000012.12	52609247	52609281	35	minus		Exon	8	NC_006609.3	2486849	2486883	35	plus	Exon	8	NC_009149.2	69699625	69699659	35	minus
	Intron	8	NC_000012.12	52608453	52609246	794	minus		Intron	8	NC_006609.3	2486884	2487606	723	plus	Intron	8	NC_009149.2	69698828	69699624	797	minus
	Exon	9 CDS	NC_000012.12	52608196	52608452	257	minus		Exon	9 CDS	NC_006609.3	2487607	2488010	404	plus	Exon	9 CDS	NC_009149.2	69698571	69698827	257	minus
	Exon	9 UTR	NC_000012.12	52607570	52608195	626	minus		Exon	9 UTR	NC_006609.3	2488011	2488426	416	plus	Exon	9 UTR	NC_009149.2	69697011	69698570	1560	minus
	Total size (bp)					10990			Total size (bp)					10542		Total size (bp)					11602
	Number of amino acids					540			Number of amino acids					589		Number of amino acids					540
KRT74 (horse LOC102150169)	Feature	Feature #	Human Chr	Human Start	Human Stop	Size	Orientation	Human Accession	Feature	Feature #	Dog Chr	Dog Start	Dog Stop	Size	Orientation	Feature	Feature #	Horse Chr	Horse Start	Horse Stop	Size	Orientation	Horse: Exon number and resulting protein sequence indicate that the current NCBI annotation may be incorrect. Due to a low RNA-seq read and uneven coverage(16.26x) we could however not provide a reliably curated annotation.
	Exon	1 UTR	NC_000012.12	52573778	52573825	48	minus	NM_175053.3	Exon	1 UTR	NC_006609.3	2519716	2519755	40	plus	Exon	1 UTR	NC_009149.2				minus
	Exon	1 CDS	NC_000012.12	52573307	52573777	471	minus		Exon	1 CDS	NC_006609.3	2519756	2520226	471	plus	Exon	1 CDS	NC_009149.2	69670526	69670996	471	minus
	Intron	1	NC_000012.12	52572668	52573306	639	minus		Intron	1	NC_006609.3	2520227	2520833	607	plus	Intron	1	NC_009149.2	69669914	69670525	612	minus
	Exon	2	NC_000012.12	52572453	52572667	215	minus		Exon	2	NC_006609.3	2520834	2521048	215	plus	Exon	2	NC_009149.2	69669699	69669913	215	minus
	Intron	2	NC_000012.12	52572005	52572452	448	minus		Intron	2	NC_006609.3	2521049	2521510	462	plus	Intron	2	NC_009149.2	69669249	69669698	450	minus
	Exon	3	NC_000012.12	52571944	52572004	61	minus		Exon	3	NC_006609.3	2521511	2521571	61	plus	Exon	3	NC_009149.2	69669188	69669248	61	minus
	Intron	3	NC_000012.12	52571455	52571943	489	minus		Intron	3	NC_006609.3	2521572	2522044	473	plus	Intron	3	NC_009149.2	69668686	69669187	502	minus
	Exon	4	NC_000012.12	52571359	52571454	96	minus		Exon	4	NC_006609.3	2522045	2522140	96	plus	Exon	4	NC_009149.2	69668590	69668685	96	minus
	Intron	4	NC_000012.12	52570834	52571358	525	minus		Intron	4	NC_006609.3	2522141	2522641	501	plus	Intron	4	NC_009149.2	69668118	69668589	472	minus
	Exon	5	NC_000012.12	52570669	52570833	165	minus		Exon	5	NC_006609.3	2522642	2522806	165	plus	Exon	5	NC_009149.2	69667959	69668117	159	minus
	Intron	5	NC_000012.12	52569985	52570668	684	minus		Intron	5	NC_006609.3	2522807	2523997	1191	plus	Intron	5	NC_009149.2	69666755	69667958	1204	minus
	Exon	6	NC_000012.12	52569859	52569984	126	minus		Exon	6	NC_006609.3	2523998	2524123	126	plus	Exon	6 CDS	NC_009149.2	69666578	69666754	177	minus
	Intron	6	NC_000012.12	52568390	52569858	1469	minus		Intron	6	NC_006609.3	2524124	2525527	1404	plus	Exon	6 UTR	NC_009149.2				minus
	Exon	7	NC_000012.12	52568169	52568389	221	minus		Exon	7	NC_006609.3	2525528	2525748	221	plus	Total size (bp)					4419
	Intron	7	NC_000012.12	52567694	52568168	475	minus		Intron	7	NC_006609.3	2525749	2526168	420	plus	Number of amino acids					392
	Exon	8	NC_000012.12	52567659	52567693	35	minus		Exon	8	NC_006609.3	2526169	2526203	35	plus
	Intron	8	NC_000012.12	52567169	52567658	490	minus		Intron	8	NC_006609.3	2526204	2526682	479	plus
	Exon	9 CDS	NC_000012.12	52566969	52567168	200	minus		Exon	9 CDS	NC_006609.3	2526683	2526894	212	plus
	Exon	9 UTR	NC_000012.12	52565819	52566968	1150	minus		Exon	9 UTR	NC_006609.3	2526895	2528107	1213	plus
	Total size (bp)					8007			Total size (bp)					8392
	Number of amino acids					529			Number of amino acids					533
KRT75 (dog LOC100683813; horse LOC100061487)	Feature	Feature #	Human Chr	Human Start	Human Stop	Size	Orientation	Human Accession	Feature	Feature #	Dog Chr	Dog Start	Dog Stop	Size	Orientation	Feature	Feature #	Horse Chr	Horse Start	Horse Stop	Size	Orientation
	Exon	1 UTR	NC_000012.12	52434305	52434326	22	minus	NM_004693.2	Exon	1 UTR	NC_006609.3	2635248	2635290	43	plus	Exon	1 UTR	NC_009149.2	69533484	69533550	67	minus
	Exon	1 CDS	NC_000012.12	52433807	52434304	498	minus		Exon	1 CDS	NC_006609.3	2635291	2635788	498	plus	Exon	1 CDS	NC_009149.2	69532992	69533483	492	minus
	Intron	1	NC_000012.12	52433253	52433806	554	minus		Intron	1	NC_006609.3	2635789	2636343	555	plus	Intron	1	NC_009149.2	69532437	69532991	555	minus
	Exon	2	NC_000012.12	52433038	52433252	215	minus		Exon	2	NC_006609.3	2636344	2636558	215	plus	Exon	2	NC_009149.2	69532222	69532436	215	minus
	Intron	2	NC_000012.12	52432067	52433037	971	minus		Intron	2	NC_006609.3	2636559	2637515	957	plus	Intron	2	NC_009149.2	69531277	69532221	945	minus
	Exon	3	NC_000012.12	52432006	52432066	61	minus		Exon	3	NC_006609.3	2637516	2637576	61	plus	Exon	3	NC_009149.2	69531216	69531276	61	minus
	Intron	3	NC_000012.12	52431639	52432005	367	minus		Intron	3	NC_006609.3	2637577	2637968	392	plus	Intron	3	NC_009149.2	69530861	69531215	355	minus
	Exon	4	NC_000012.12	52431543	52431638	96	minus		Exon	4	NC_006609.3	2637969	2638064	96	plus	Exon	4	NC_009149.2	69530765	69530860	96	minus
	Intron	4	NC_000012.12	52430706	52431542	837	minus		Intron	4	NC_006609.3	2638065	2638909	845	plus	Intron	4	NC_009149.2	69529927	69530764	838	minus
	Exon	5	NC_000012.12	52430541	52430705	165	minus		Exon	5	NC_006609.3	2638910	2639074	165	plus	Exon	5	NC_009149.2	69529762	69529926	165	minus
	Intron	5	NC_000012.12	52428744	52430540	1797	minus		Intron	5	NC_006609.3	2639075	2641118	2044	plus	Intron	5	NC_009149.2	69527903	69529761	1859	minus
	Exon	6	NC_000012.12	52428618	52428743	126	minus		Exon	6	NC_006609.3	2641119	2641244	126	plus	Exon	6	NC_009149.2	69527777	69527902	126	minus
	Intron	6	NC_000012.12	52428477	52428617	141	minus		Intron	6	NC_006609.3	2641245	2641385	141	plus	Intron	6	NC_009149.2	69527643	69527776	134	minus
	Exon	7	NC_000012.12	52428256	52428476	221	minus		Exon	7	NC_006609.3	2641386	2641606	221	plus	Exon	7	NC_009149.2	69527422	69527642	221	minus
	Intron	7	NC_000012.12	52426852	52428255	1404	minus		Intron	7	NC_006609.3	2641607	2643001	1395	plus	Intron	7	NC_009149.2	69526049	69527421	1373	minus
	Exon	8	NC_000012.12	52426817	52426851	35	minus		Exon	8	NC_006609.3	2643002	2643036	35	plus	Exon	8	NC_009149.2	69526014	69526048	35	minus
	Intron	8	NC_000012.12	52424756	52426816	2061	minus		Intron	8	NC_006609.3	2643037	2644976	1940	plus	Intron	8	NC_009149.2	69524028	69526013	1986	minus
	Exon	9 CDS	NC_000012.12	52424517	52424755	239	minus		Exon	9 CDS	NC_006609.3	2644977	2645215	239	plus	Exon	9 CDS	NC_009149.2	69523789	69524027	239	minus
	Exon	9 UTR	NC_000012.12	52424070	52424516	447	minus		Exon	9 UTR	NC_006609.3	2645216	2645687	472	plus	Exon	9 UTR	NC_009149.2	69523615	69523788	174	minus
	Total size (bp)					10257			Total size (bp)					10440		Total size (bp)					9936
	Number of amino acids					551			Number of amino acids					551		Number of amino acids					549
KRT76	Feature	Feature #	Human Chr	Human Start	Human Stop	Size	Orientation	Human Accession	Feature	Feature #	Dog Chr	Dog Start	Dog Stop	Size	Orientation	Feature	Feature #	Horse Chr	Horse Start	Horse Stop	Size	Orientation
	Exon	1 UTR	NC_000012.12	52777292	52777345	54	minus	NM_015848.4	Exon	1 UTR	NC_006609.3	2337874	2337928	55	plus	Exon	1 UTR	NC_009149.2				minus
	Exon	1 CDS	NC_000012.12	52776692	52777291	600	minus		Exon	1 CDS	NC_006609.3	2337929	2338579	651	plus	Exon	1 CDS	NC_009149.2	69861623	69862231	609	minus
	Intron	1	NC_000012.12	52775603	52776691	1089	minus		Intron	1	NC_006609.3	2338580	2339864	1285	plus	Intron	1	NC_009149.2	69860556	69861622	1067	minus
	Exon	2	NC_000012.12	52775388	52775602	215	minus		Exon	2	NC_006609.3	2339865	2340085	221	plus	Exon	2	NC_009149.2	69860335	69860555	221	minus
	Intron	2	NC_000012.12	52773643	52775387	1745	minus		Intron	2	NC_006609.3	2340086	2341418	1333	plus	Intron	2	NC_009149.2	69858956	69860334	1379	minus
	Exon	3	NC_000012.12	52773582	52773642	61	minus		Exon	3	NC_006609.3	2341419	2341479	61	plus	Exon	3	NC_009149.2	69858895	69858955	61	minus
	Intron	3	NC_000012.12	52772879	52773581	703	minus		Intron	3	NC_006609.3	2341480	2342161	682	plus	Intron	3	NC_009149.2	69858234	69858894	661	minus
	Exon	4	NC_000012.12	52772783	52772878	96	minus		Exon	4	NC_006609.3	2342162	2342257	96	plus	Exon	4	NC_009149.2	69858138	69858233	96	minus
	Intron	4	NC_000012.12	52772259	52772782	524	minus		Intron	4	NC_006609.3	2342258	2342870	613	plus	Intron	4	NC_009149.2	69857571	69858137	567	minus
	Exon	5	NC_000012.12	52772094	52772258	165	minus		Exon	5	NC_006609.3	2342871	2343017	147	plus	Exon	5	NC_009149.2	69857406	69857570	165	minus
	Intron	5	NC_000012.12	52771997	52772093	97	minus		Intron	5	NC_006609.3	2343018	2343124	107	plus	Intron	5	NC_009149.2	69857298	69857405	108	minus
	Exon	6	NC_000012.12	52771871	52771996	126	minus		Exon	6	NC_006609.3	2343125	2343250	126	plus	Exon	6	NC_009149.2	69857172	69857297	126	minus
	Intron	6	NC_000012.12	52771220	52771870	651	minus		Intron	6	NC_006609.3	2343251	2343888	638	plus	Intron	6	NC_009149.2	69856529	69857171	643	minus
	Exon	7	NC_000012.12	52770999	52771219	221	minus		Exon	7	NC_006609.3	2343889	2344109	221	plus	Exon	7	NC_009149.2	69856308	69856528	221	minus
	Intron	7	NC_000012.12	52769584	52770998	1415	minus		Intron	7	NC_006609.3	2344110	2345424	1315	plus	Intron	7	NC_009149.2	69854829	69856307	1479	minus
	Exon	8	NC_000012.12	52769549	52769583	35	minus		Exon	8	NC_006609.3	2345425	2345459	35	plus	Exon	8	NC_009149.2	69854794	69854828	35	minus
	Intron	8	NC_000012.12	52769111	52769548	438	minus		Intron	8	NC_006609.3	2345460	2345861	402	plus	Intron	8	NC_009149.2	69854377	69854793	417	minus
	Exon	9 CDS	NC_000012.12	52768713	52769110	398	minus		Exon	9 CDS	NC_006609.3	2345862	2346250	389	plus	Exon	9 CDS	NC_009149.2	69853988	69854376	389	minus
	Exon	9 UTR	NC_000012.12	52768155	52768712	558	minus		Exon	9 UTR	NC_006609.3	2346251	2346792	542	plus	Exon	9 UTR	NC_009149.2
	Total size (bp)					9191			Total size (bp)					8919		Total size (bp)					8244
	Number of amino acids					638			Number of amino acids					648		Number of amino acids					640
KRT77 (dog LOC100683333)	Feature	Feature #	Human Chr	Human Start	Human Stop	Size	Orientation	Human Accession	Feature	Feature #	Dog Chr	Dog Start	Dog Stop	Size	Orientation	Feature	Feature #	Horse Chr	Horse Start	Horse Stop	Size	Orientation	Dog: Gap (chr27:2412265-2412884) in reference genome assembly in the last coding exon. Coordinates of the stop codon and the start of the 3'-UTR may be incorrect.
	Exon	1 UTR	NC_000012.12	52703435	52703463	29	minus	NM_175078.2	Exon	1 UTR	NC_006609.3	2400126	2400223	98	plus	Exon	1 UTR	NC_009149.2	69817011	69817088	78	minus
	Exon	1 CDS	NC_000012.12	52702892	52703434	543	minus		Exon	1 CDS	NC_006609.3	2400224	2400802	579	plus	Exon	1 CDS	NC_009149.2	69816447	69817010	564	minus
	Intron	1	NC_000012.12	52697897	52702891	4995	minus		Intron	1	NC_006609.3	2400803	2405706	4904	plus	Intron	1	NC_009149.2	69812451	69816446	3996	minus
	Exon	2	NC_000012.12	52697682	52697896	215	minus		Exon	2	NC_006609.3	2405707	2405921	215	plus	Exon	2	NC_009149.2	69812236	69812450	215	minus
	Intron	2	NC_000012.12	52696431	52697681	1251	minus		Intron	2	NC_006609.3	2405922	2407423	1502	plus	Intron	2	NC_009149.2	69811066	69812235	1170	minus
	Exon	3	NC_000012.12	52696370	52696430	61	minus		Exon	3	NC_006609.3	2407424	2407484	61	plus	Exon	3	NC_009149.2	69811005	69811065	61	minus
	Intron	3	NC_000012.12	52695868	52696369	502	minus		Intron	3	NC_006609.3	2407485	2407986	502	plus	Intron	3	NC_009149.2	69810484	69811004	521	minus
	Exon	4	NC_000012.12	52695772	52695867	96	minus		Exon	4	NC_006609.3	2407987	2408082	96	plus	Exon	4	NC_009149.2	69810388	69810483	96	minus
	Intron	4	NC_000012.12	52694791	52695771	981	minus		Intron	4	NC_006609.3	2408083	2409048	966	plus	Intron	4	NC_009149.2	69809454	69810387	934	minus
	Exon	5	NC_000012.12	52694626	52694790	165	minus		Exon	5	NC_006609.3	2409049	2409213	165	plus	Exon	5	NC_009149.2	69809289	69809453	165	minus
	Intron	5	NC_000012.12	52692881	52694625	1745	minus		Intron	5	NC_006609.3	2409214	2410058	845	plus	Intron	5	NC_009149.2	69807827	69809288	1462	minus
	Exon	6	NC_000012.12	52692755	52692880	126	minus		Exon	6	NC_006609.3	2410059	2410184	126	plus	Exon	6	NC_009149.2	69807701	69807826	126	minus
	Intron	6	NC_000012.12	52692642	52692754	113	minus		Intron	6	NC_006609.3	2410185	2410269	85	plus	Intron	6	NC_009149.2	69807582	69807700	119	minus
	Exon	7	NC_000012.12	52692421	52692641	221	minus		Exon	7	NC_006609.3	2410270	2410490	221	plus	Exon	7	NC_009149.2	69807361	69807581	221	minus
	Intron	7	NC_000012.12	52691973	52692420	448	minus		Intron	7	NC_006609.3	2410491	2410836	346	plus	Intron	7	NC_009149.2	69806929	69807360	432	minus
	Exon	8	NC_000012.12	52691938	52691972	35	minus		Exon	8	NC_006609.3	2410837	2410871	35	plus	Exon	8	NC_009149.2	69806894	69806928	35	minus
	Intron	8	NC_000012.12	52691440	52691937	498	minus		Intron	8	NC_006609.3	2410872	2412041	1170	plus	Intron	8	NC_009149.2	69806469	69806893	425	minus
	Exon	9 CDS	NC_000012.12	52691165	52691439	275	minus		Exon	9 CDS	NC_006609.3	2412042	2412264	223	plus	Exon	9 CDS	NC_009149.2	69806170	69806468	299	minus
	Exon	9 UTR	NC_000012.12	52689626	52691164	1539	minus		Exon	9 UTR	NC_006609.3	2412885	2413545	661	plus	Exon	9 UTR	NC_009149.2	69804823	69806169	1347	minus
	Total size (bp)					13838			Total size (bp)					12800		Total size (bp)					12266
	Number of amino acids					578			Number of amino acids					572.667		Number of amino acids					593
KRT78	Feature	Feature #	Human Chr	Human Start	Human Stop	Size	Orientation	Human Accession	Feature	Feature #	Dog Chr	Dog Start	Dog Stop	Size	Orientation	Feature	Feature #	Horse Chr	Horse Start	Horse Stop	Size	Orientation	Horse: Gap(chr6:69933880-69934077) in reference genome assembly. Coordinates and size of exon 4 are incorrect. A new entry for this gene has been submitted to the EMBL database, accessions LT576419 (primary genomic sequence spanning the gap) and LT576421 (complete gene assembled from existing reference genome and the newly derived sequence)
	Exon	1 UTR	NC_000012.12	52848931	52848994	64	minus	NM_173352.3	Exon	1 UTR	NC_006609.3	2257238	2257283	46	plus	Exon	1 UTR	NC_009149.2	69936641	69936685	45	minus
	Exon	1 CDS	NC_000012.12	52848547	52848930	384	minus		Exon	1 CDS	NC_006609.3	2257284	2257652	369	plus	Exon	1 CDS	NC_009149.2	69936275	69936640	366	minus
	Intron	1	NC_000012.12	52848122	52848546	425	minus		Intron	1	NC_006609.3	2257653	2258333	681	plus	Intron	1	NC_009149.2	69935874	69936274	401	minus
	Exon	2	NC_000012.12	52847907	52848121	215	minus		Exon	2	NC_006609.3	2258334	2258548	215	plus	Exon	2	NC_009149.2	69935659	69935873	215	minus
	Intron	2	NC_000012.12	52846825	52847906	1082	minus		Intron	2	NC_006609.3	2258549	2259574	1026	plus	Intron	2	NC_009149.2	69934636	69935658	1023	minus
	Exon	3	NC_000012.12	52846764	52846824	61	minus		Exon	3	NC_006609.3	2259575	2259635	61	plus	Exon	3	NC_009149.2	69934575	69934635	61	minus
	Intron	3	NC_000012.12	52846293	52846763	471	minus		Intron	3	NC_006609.3	2259636	2260087	452	plus	Intron	3	NC_009149.2	69934106	69934574	469	minus
	Exon	4	NC_000012.12	52846197	52846292	96	minus		Exon	4	NC_006609.3	2260088	2260183	96	plus	Exon	4	NC_009149.2	69934078	69934105	28	minus
	Intron	4	NC_000012.12	52844724	52846196	1473	minus		Intron	4	NC_006609.3	2260184	2260989	806	plus	Intron	4	NC_009149.2	69933310	69934077	768	minus
	Exon	5	NC_000012.12	52844559	52844723	165	minus		Exon	5	NC_006609.3	2260990	2261154	165	plus	Exon	5	NC_009149.2	69933145	69933309	165	minus
	Intron	5	NC_000012.12	52844219	52844558	340	minus		Intron	5	NC_006609.3	2261155	2261491	337	plus	Intron	5	NC_009149.2	69932804	69933144	341	minus
	Exon	6	NC_000012.12	52844093	52844218	126	minus		Exon	6	NC_006609.3	2261492	2261617	126	plus	Exon	6	NC_009149.2	69932678	69932803	126	minus
	Intron	6	NC_000012.12	52839985	52844092	4108	minus		Intron	6	NC_006609.3	2261618	2263960	2343	plus	Intron	6	NC_009149.2	69930179	69932677	2499	minus
	Exon	7	NC_000012.12	52839764	52839984	221	minus		Exon	7	NC_006609.3	2263961	2264181	221	plus	Exon	7	NC_009149.2	69929958	69930178	221	minus
	Intron	7	NC_000012.12	52839488	52839763	276	minus		Intron	7	NC_006609.3	2264182	2264409	228	plus	Intron	7	NC_009149.2	69929686	69929957	272	minus
	Exon	8	NC_000012.12	52839453	52839487	35	minus		Exon	8	NC_006609.3	2264410	2264444	35	plus	Exon	8	NC_009149.2	69929651	69929685	35	minus
	Intron	8	NC_000012.12	52839373	52839452	80	minus		Intron	8	NC_006609.3	2264445	2264518	74	plus	Intron	8	NC_009149.2	69929570	69929650	81	minus
	Exon	9 CDS	NC_000012.12	52839113	52839372	260	minus		Exon	9 CDS	NC_006609.3	2264519	2264784	266	plus	Exon	9 CDS	NC_009149.2	69929355	69929569	215	minus
	Exon	9 UTR	NC_000012.12	52837804	52839112	1309	minus		Exon	9 UTR	NC_006609.3	2264785	2264944	160	plus	Exon	9 UTR	NC_009149.2	69929138	69929354	217	minus
	Total size (bp)					11191			Total size (bp)					7707		Total size (bp)					7503
	Number of amino acids					520			Number of amino acids					517		Number of amino acids					499
KRT79	Feature	Feature #	Human Chr	Human Start	Human Stop	Size	Orientation	Human Accession	Feature	Feature #	Dog Chr	Dog Start	Dog Stop	Size	Orientation	Feature	Feature #	Horse Chr	Horse Start	Horse Stop	Size	Orientation
	Exon	1 UTR	NC_000012.12	52834261	52834293	33	minus	NM_175834.2	Exon	1 UTR	NC_006609.3	2269717	2269856	140	plus	Exon	1 UTR	NC_009149.2	69924133	69924173	41	minus
	Exon	1 CDS	NC_000012.12	52833784	52834260	477	minus		Exon	1 CDS	NC_006609.3	2269857	2270333	477	plus	Exon	1 CDS	NC_009149.2	69923656	69924132	477	minus
	Intron	1	NC_000012.12	52831627	52833783	2157	minus		Intron	1	NC_006609.3	2270334	2272587	2254	plus	Intron	1	NC_009149.2	69921629	69923655	2027	minus
	Exon	2	NC_000012.12	52831406	52831626	221	minus		Exon	2	NC_006609.3	2272588	2272808	221	plus	Exon	2	NC_009149.2	69921408	69921628	221	minus
	Intron	2	NC_000012.12	52830293	52831405	1113	minus		Intron	2	NC_006609.3	2272809	2273881	1073	plus	Intron	2	NC_009149.2	69920372	69921407	1036	minus
	Exon	3	NC_000012.12	52830232	52830292	61	minus		Exon	3	NC_006609.3	2273882	2273942	61	plus	Exon	3	NC_009149.2	69920311	69920371	61	minus
	Intron	3	NC_000012.12	52830119	52830231	113	minus		Intron	3	NC_006609.3	2273943	2274065	123	plus	Intron	3	NC_009149.2	69920202	69920310	109	minus
	Exon	4	NC_000012.12	52830023	52830118	96	minus		Exon	4	NC_006609.3	2274066	2274161	96	plus	Exon	4	NC_009149.2	69920106	69920201	96	minus
	Intron	4	NC_000012.12	52824363	52830022	5660	minus		Intron	4	NC_006609.3	2274162	2277589	3428	plus	Intron	4	NC_009149.2	69914964	69920105	5142	minus
	Exon	5	NC_000012.12	52824198	52824362	165	minus		Exon	5	NC_006609.3	2277590	2277754	165	plus	Exon	5	NC_009149.2	69914799	69914963	165	minus
	Intron	5	NC_000012.12	52824013	52824197	185	minus		Intron	5	NC_006609.3	2277755	2277937	183	plus	Intron	5	NC_009149.2	69914607	69914798	192	minus
	Exon	6	NC_000012.12	52823887	52824012	126	minus		Exon	6	NC_006609.3	2277938	2278063	126	plus	Exon	6	NC_009149.2	69914481	69914606	126	minus
	Intron	6	NC_000012.12	52823237	52823886	650	minus		Intron	6	NC_006609.3	2278064	2278712	649	plus	Intron	6	NC_009149.2	69913816	69914480	665	minus
	Exon	7	NC_000012.12	52823016	52823236	221	minus		Exon	7	NC_006609.3	2278713	2278933	221	plus	Exon	7	NC_009149.2	69913595	69913815	221	minus
	Intron	7	NC_000012.12	52822380	52823015	636	minus		Intron	7	NC_006609.3	2278934	2279543	610	plus	Intron	7	NC_009149.2	69912927	69913594	668	minus
	Exon	8	NC_000012.12	52822345	52822379	35	minus		Exon	8	NC_006609.3	2279544	2279578	35	plus	Exon	8	NC_009149.2	69912892	69912926	35	minus
	Intron	8	NC_000012.12	52822078	52822344	267	minus		Intron	8	NC_006609.3	2279579	2279846	268	plus	Intron	8	NC_009149.2	69912637	69912891	255	minus
	Exon	9 CDS	NC_000012.12	52821872	52822077	206	minus		Exon	9 CDS	NC_006609.3	2279847	2280052	206	plus	Exon	9 CDS	NC_009149.2	69912431	69912636	206	minus
	Exon	9 UTR	NC_000012.12	52821447	52821871	425	minus		Exon	9 UTR	NC_006609.3	2280053	2280537	485	plus	Exon	9 UTR	NC_009149.2	69911915	69912430	516	minus
	Total size (bp)					12847			Total size (bp)					10821		Total size (bp)					12259
	Number of amino acids					535			Number of amino acids					535		Number of amino acids					535
KRT80	Feature	Feature #	Human Chr	Human Start	Human Stop	Size	Orientation	Human Accession	Feature	Feature #	Dog Chr	Dog Start	Dog Stop	Size	Orientation	Feature	Feature #	Horse Chr	Horse Start	Horse Stop	Size	Orientation
	Exon	1 UTR	NC_000012.12	52191903	52192000	98	minus	NM_182507.2	Exon	1 UTR	NC_006609.3	2862226	2862375	150	plus	Exon	1 UTR	NC_009149.2	69301204	69301303	100	minus
	Exon	1 CDS	NC_000012.12	52191603	52191902	300	minus		Exon	1 CDS	NC_006609.3	2862376	2862675	300	plus	Exon	1 CDS	NC_009149.2	69300901	69301203	303	minus
	Intron	1	NC_000012.12	52185588	52191602	6015	minus		Intron	1	NC_006609.3	2862676	2867563	4888	plus	Intron	1	NC_009149.2	69295061	69300900	5840	minus
	Exon	2	NC_000012.12	52185379	52185587	209	minus		Exon	2	NC_006609.3	2867564	2867772	209	plus	Exon	2	NC_009149.2	69294852	69295060	209	minus
	Intron	2	NC_000012.12	52180964	52185378	4415	minus		Intron	2	NC_006609.3	2867773	2872324	4552	plus	Intron	2	NC_009149.2	69290291	69294851	4561	minus
	Exon	3	NC_000012.12	52180903	52180963	61	minus		Exon	3	NC_006609.3	2872325	2872385	61	plus	Exon	3	NC_009149.2	69290230	69290290	61	minus
	Intron	3	NC_000012.12	52180609	52180902	294	minus		Intron	3	NC_006609.3	2872386	2872588	203	plus	Intron	3	NC_009149.2	69289967	69290229	263	minus
	Exon	4	NC_000012.12	52180513	52180608	96	minus		Exon	4	NC_006609.3	2872589	2872684	96	plus	Exon	4	NC_009149.2	69289871	69289966	96	minus
	Intron	4	NC_000012.12	52173765	52180512	6748	minus		Intron	4	NC_006609.3	2872685	2879359	6675	plus	Intron	4	NC_009149.2	69283138	69289870	6733	minus
	Exon	5	NC_000012.12	52173600	52173764	165	minus		Exon	5	NC_006609.3	2879360	2879524	165	plus	Exon	5	NC_009149.2	69282973	69283137	165	minus
	Intron	5	NC_000012.12	52173164	52173599	436	minus		Intron	5	NC_006609.3	2879525	2879788	264	plus	Intron	5	NC_009149.2	69282521	69282972	452	minus
	Exon	6	NC_000012.12	52173038	52173163	126	minus		Exon	6	NC_006609.3	2879789	2879914	126	plus	Exon	6	NC_009149.2	69282395	69282520	126	minus
	Intron	6	NC_000012.12	52172419	52173037	619	minus		Intron	6	NC_006609.3	2879915	2880855	941	plus	Intron	6	NC_009149.2	69281786	69282394	609	minus
	Exon	7	NC_000012.12	52172198	52172418	221	minus		Exon	7	NC_006609.3	2880856	2881076	221	plus	Exon	7	NC_009149.2	69281565	69281785	221	minus
	Intron	7	NC_000012.12	52171714	52172197	484	minus		Intron	7	NC_006609.3	2881077	2881531	455	plus	Intron	7	NC_009149.2	69281164	69281564	401	minus
	Exon	8	NC_000012.12	52171658	52171713	56	minus		Exon	8	NC_006609.3	2881532	2881587	56	plus	Exon	8	NC_009149.2	69281108	69281163	56	minus
	Intron	8	NC_000012.12	52171523	52171657	135	minus		Intron	8	NC_006609.3	2881588	2881720	133	plus	Intron	8	NC_009149.2	69280976	69281107	132	minus
	Exon	9 CDS	NC_000012.12	52171398	52171522	125	minus		Exon	9 CDS	NC_006609.3	2881721	2881848	128	plus	Exon	9 CDS	NC_009149.2	69280851	69280975	125	minus
	Exon	9 UTR	NC_000012.12	52168996	52171397	2402	minus		Exon	9 UTR	NC_006609.3	2881849	2883727	1879	plus	Exon	9 UTR	NC_009149.2	69279019	69280850	1832	minus
	Total size (bp)					23005			Total size (bp)					21502		Total size (bp)					22285
	Number of amino acids					452			Number of amino acids					453		Number of amino acids					453
KRT81 (dog LOC486531; horse LOC100062930)	Feature	Feature #	Human Chr	Human Start	Human Stop	Size	Orientation	Human Accession	Feature	Feature #	Dog Chr	Dog Start	Dog Stop	Size	Orientation	Feature	Feature #	Horse Chr	Horse Start	Horse Stop	Size	Orientation
	Exon	1 UTR	NC_000012.12	52291466	52291515	50	minus	NM_002281.3	Exon	1 UTR	NC_006609.3	2776662	2776767	106	plus	Exon	1 UTR	NC_009149.2	69394029	69394098	70	minus
	Exon	1 CDS	NC_000012.12	52291097	52291465	369	minus		Exon	1 CDS	NC_006609.3	2776768	2777136	369	plus	Exon	1 CDS	NC_009149.2	69393660	69394028	369	minus
	Intron	1	NC_000012.12	52290287	52291096	810	minus		Intron	1	NC_006609.3	2777137	2777840	704	plus	Intron	1	NC_009149.2	69392951	69393659	709	minus
	Exon	2	NC_000012.12	52290078	52290286	209	minus		Exon	2	NC_006609.3	2777841	2778049	209	plus	Exon	2	NC_009149.2	69392742	69392950	209	minus
	Intron	2	NC_000012.12	52289276	52290077	802	minus		Intron	2	NC_006609.3	2778050	2778815	766	plus	Intron	2	NC_009149.2	69391949	69392741	793	minus
	Exon	3	NC_000012.12	52289215	52289275	61	minus		Exon	3	NC_006609.3	2778816	2778876	61	plus	Exon	3	NC_009149.2	69391888	69391948	61	minus
	Intron	3	NC_000012.12	52288457	52289214	758	minus		Intron	3	NC_006609.3	2778877	2779578	702	plus	Intron	3	NC_009149.2	69391117	69391887	771	minus
	Exon	4	NC_000012.12	52288361	52288456	96	minus		Exon	4	NC_006609.3	2779579	2779674	96	plus	Exon	4	NC_009149.2	69391021	69391116	96	minus
	Intron	4	NC_000012.12	52288149	52288360	212	minus		Intron	4	NC_006609.3	2779675	2779885	211	plus	Intron	4	NC_009149.2	69390799	69391020	222	minus
	Exon	5	NC_000012.12	52287984	52288148	165	minus		Exon	5	NC_006609.3	2779886	2780050	165	plus	Exon	5	NC_009149.2	69390634	69390798	165	minus
	Intron	5	NC_000012.12	52287722	52287983	262	minus		Intron	5	NC_006609.3	2780051	2780248	198	plus	Intron	5	NC_009149.2	69390440	69390633	194	minus
	Exon	6	NC_000012.12	52287596	52287721	126	minus		Exon	6	NC_006609.3	2780249	2780374	126	plus	Exon	6	NC_009149.2	69390314	69390439	126	minus
	Intron	6	NC_000012.12	52287323	52287595	273	minus		Intron	6	NC_006609.3	2780375	2780611	237	plus	Intron	6	NC_009149.2	69390065	69390313	249	minus
	Exon	7	NC_000012.12	52287102	52287322	221	minus		Exon	7	NC_006609.3	2780612	2780832	221	plus	Exon	7	NC_009149.2	69389844	69390064	221	minus
	Intron	7	NC_000012.12	52286823	52287101	279	minus		Intron	7	NC_006609.3	2780833	2781092	260	plus	Intron	7	NC_009149.2	69389557	69389843	287	minus
	Exon	8	NC_000012.12	52286791	52286822	32	minus		Exon	8	NC_006609.3	2781093	2781124	32	plus	Exon	8	NC_009149.2	69389525	69389556	32	minus
	Intron	8	NC_000012.12	52286494	52286790	297	minus		Intron	8	NC_006609.3	2781125	2781418	294	plus	Intron	8	NC_009149.2	69389221	69389524	304	minus
	Exon	9 CDS	NC_000012.12	52286255	52286493	239	minus		Exon	9 CDS	NC_006609.3	2781419	2781681	263	plus	Exon	9 CDS	NC_009149.2	69388976	69389220	245	minus
	Exon	9 UTR	NC_000012.12	52285913	52286254	342	minus		Exon	9 UTR	NC_006609.3	2781682	2782016	335	plus	Exon	9 UTR	NC_009149.2	69388608	69388975	368	minus
	Total size (bp)					5603			Total size (bp)					5355		Total size (bp)					5491
	Number of amino acids					505			Number of amino acids					513		Number of amino acids					507
KRT82	Feature	Feature #	Human Chr	Human Start	Human Stop	Size	Orientation	Human Accession	Feature	Feature #	Dog Chr	Dog Start	Dog Stop	Size	Orientation	Feature	Feature #	Horse Chr	Horse Start	Horse Stop	Size	Orientation
	Exon	1 UTR	NC_000012.12	52406278	52406392	115	minus	NM_033033.3	Exon	1 UTR	NC_006609.3	2663433	2663484	52	plus	Exon	1 UTR	NC_009149.2	69506234	69506300	67	minus
	Exon	1 CDS	NC_000012.12	52405867	52406277	411	minus		Exon	1 CDS	NC_006609.3	2663485	2663889	405	plus	Exon	1 CDS	NC_009149.2	69505829	69506233	405	minus
	Intron	1	NC_000012.12	52403910	52405866	1957	minus		Intron	1	NC_006609.3	2663890	2665727	1838	plus	Intron	1	NC_009149.2	69503805	69505828	2024	minus
	Exon	2	NC_000012.12	52403701	52403909	209	minus		Exon	2	NC_006609.3	2665728	2665936	209	plus	Exon	2	NC_009149.2	69503596	69503804	209	minus
	Intron	2	NC_000012.12	52401350	52403700	2351	minus		Intron	2	NC_006609.3	2665937	2668231	2295	plus	Intron	2	NC_009149.2	69501320	69503595	2276	minus
	Exon	3	NC_000012.12	52401289	52401349	61	minus		Exon	3	NC_006609.3	2668232	2668292	61	plus	Exon	3	NC_009149.2	69501259	69501319	61	minus
	Intron	3	NC_000012.12	52400623	52401288	666	minus		Intron	3	NC_006609.3	2668293	2668944	652	plus	Intron	3	NC_009149.2	69500598	69501258	661	minus
	Exon	4	NC_000012.12	52400527	52400622	96	minus		Exon	4	NC_006609.3	2668945	2669040	96	plus	Exon	4	NC_009149.2	69500502	69500597	96	minus
	Intron	4	NC_000012.12	52400150	52400526	377	minus		Intron	4	NC_006609.3	2669041	2669407	367	plus	Intron	4	NC_009149.2	69500133	69500501	369	minus
	Exon	5	NC_000012.12	52399985	52400149	165	minus		Exon	5	NC_006609.3	2669408	2669572	165	plus	Exon	5	NC_009149.2	69499968	69500132	165	minus
	Intron	5	NC_000012.12	52397009	52399984	2976	minus		Intron	5	NC_006609.3	2669573	2671603	2031	plus	Intron	5	NC_009149.2	69497418	69499967	2550	minus
	Exon	6	NC_000012.12	52396883	52397008	126	minus		Exon	6	NC_006609.3	2671604	2671729	126	plus	Exon	6	NC_009149.2	69497292	69497417	126	minus
	Intron	6	NC_000012.12	52396233	52396882	650	minus		Intron	6	NC_006609.3	2671730	2673218	1489	plus	Intron	6	NC_009149.2	69495842	69497291	1450	minus
	Exon	7	NC_000012.12	52396012	52396232	221	minus		Exon	7	NC_006609.3	2673219	2673439	221	plus	Exon	7	NC_009149.2	69495621	69495841	221	minus
	Intron	7	NC_000012.12	52395791	52396011	221	minus		Intron	7	NC_006609.3	2673440	2673670	231	plus	Intron	7	NC_009149.2	69495399	69495620	222	minus
	Exon	8	NC_000012.12	52395759	52395790	32	minus		Exon	8	NC_006609.3	2673671	2673702	32	plus	Exon	8	NC_009149.2	69495367	69495398	32	minus
	Intron	8	NC_000012.12	52395196	52395758	563	minus		Intron	8	NC_006609.3	2673703	2674214	512	plus	Intron	8	NC_009149.2	69494824	69495366	543	minus
	Exon	9 CDS	NC_000012.12	52394975	52395195	221	minus		Exon	9 CDS	NC_006609.3	2674215	2674456	242	plus	Exon	9 CDS	NC_009149.2	69494582	69494823	242	minus
	Exon	9 UTR	NC_000012.12	52393951	52394974	1024	minus		Exon	9 UTR	NC_006609.3	2674457	2675425	969	plus	Exon	9 UTR	NC_009149.2	69493456	69494581	1126	minus
	Total size (bp)					12442			Total size (bp)					11993		Total size (bp)					11652
	Number of amino acids					513			Number of amino acids					518		Number of amino acids					518
KRT83 (dog LOC486529; horse LOC100062930)	Feature	Feature #	Human Chr	Human Start	Human Stop	Size	Orientation	Human Accession	Feature	Feature #	Dog Chr	Dog Start	Dog Stop	Size	Orientation	Feature	Feature #	Horse Chr	Horse Start	Horse Stop	Size	Orientation
	Exon	1 UTR	NC_000012.12	52321336	52321398	63	minus	NM_002282.3	Exon	1 UTR	NC_006609.3	2746175	2746252	78	plus	Exon	1 UTR	NC_009149.2	69422619	69422669	51	minus
	Exon	1 CDS	NC_000012.12	52320952	52321335	384	minus		Exon	1 CDS	NC_006609.3	2746253	2746636	384	plus	Exon	1 CDS	NC_009149.2	69422235	69422618	384	minus
	Intron	1	NC_000012.12	52319365	52320951	1587	minus		Intron	1	NC_006609.3	2746637	2748221	1585	plus	Intron	1	NC_009149.2	69420492	69422234	1743	minus
	Exon	2	NC_000012.12	52319156	52319364	209	minus		Exon	2	NC_006609.3	2748222	2748430	209	plus	Exon	2	NC_009149.2	69420283	69420491	209	minus
	Intron	2	NC_000012.12	52317971	52319155	1185	minus		Intron	2	NC_006609.3	2748431	2749458	1028	plus	Intron	2	NC_009149.2	69419289	69420282	994	minus
	Exon	3	NC_000012.12	52317910	52317970	61	minus		Exon	3	NC_006609.3	2749459	2749519	61	plus	Exon	3	NC_009149.2	69419228	69419288	61	minus
	Intron	3	NC_000012.12	52317777	52317909	133	minus		Intron	3	NC_006609.3	2749520	2749646	127	plus	Intron	3	NC_009149.2	69419094	69419227	134	minus
	Exon	4	NC_000012.12	52317681	52317776	96	minus		Exon	4	NC_006609.3	2749647	2749742	96	plus	Exon	4	NC_009149.2	69418998	69419093	96	minus
	Intron	4	NC_000012.12	52317024	52317680	657	minus		Intron	4	NC_006609.3	2749743	2749953	211	plus	Intron	4	NC_009149.2	69418397	69418997	601	minus
	Exon	5	NC_000012.12	52316859	52317023	165	minus		Exon	5	NC_006609.3	2749954	2750118	165	plus	Exon	5	NC_009149.2	69418232	69418396	165	minus
	Intron	5	NC_000012.12	52316594	52316858	265	minus		Intron	5	NC_006609.3	2750119	2750315	197	plus	Intron	5	NC_009149.2	69418040	69418231	192	minus
	Exon	6	NC_000012.12	52316468	52316593	126	minus		Exon	6	NC_006609.3	2750316	2750441	126	plus	Exon	6	NC_009149.2	69417914	69418039	126	minus
	Intron	6	NC_000012.12	52316114	52316467	354	minus		Intron	6	NC_006609.3	2750442	2750677	236	plus	Intron	6	NC_009149.2	69417665	69417913	249	minus
	Exon	7	NC_000012.12	52315893	52316113	221	minus		Exon	7	NC_006609.3	2750678	2750898	221	plus	Exon	7	NC_009149.2	69417444	69417664	221	minus
	Intron	7	NC_000012.12	52315344	52315892	549	minus		Intron	7	NC_006609.3	2750899	2751571	673	plus	Intron	7	NC_009149.2	69417129	69417443	315	minus
	Exon	8	NC_000012.12	52315312	52315343	32	minus		Exon	8	NC_006609.3	2751572	2751603	32	plus	Exon	8	NC_009149.2	69417097	69417128	32	minus
	Intron	8	NC_000012.12	52314819	52315311	493	minus		Intron	8	NC_006609.3	2751604	2752046	443	plus	Intron	8	NC_009149.2	69416614	69417096	483	minus
	Exon	9 CDS	NC_000012.12	52314631	52314818	188	minus		Exon	9 CDS	NC_006609.3	2752047	2752216	170	plus	Exon	9 CDS	NC_009149.2	69416432	69416613	182	minus
	Exon	9 UTR	NC_000012.12	52314301	52314630	330	minus		Exon	9 UTR	NC_006609.3	2752217	2752471	255	plus	Exon	9 UTR	NC_009149.2	69416103	69416431	329	minus
	Total size (bp)					7098			Total size (bp)					6297		Total size (bp)					6567
	Number of amino acids					493			Number of amino acids					487		Number of amino acids					491
KRT84	Feature	Feature #	Human Chr	Human Start	Human Stop	Size	Orientation	Human Accession	Feature	Feature #	Dog Chr	Dog Start	Dog Stop	Size	Orientation	Feature	Feature #	Horse Chr	Horse Start	Horse Stop	Size	Orientation
	Exon	1 UTR	NC_000012.12	52385586	52385633	48	minus	NM_033045.3	Exon	1 UTR	NC_006609.3	2683860	2683907	48	plus	Exon	1 UTR	NC_009149.2	69485307	69485374	68	minus
	Exon	1 CDS	NC_000012.12	52385040	52385585	546	minus		Exon	1 CDS	NC_006609.3	2683908	2684414	507	plus	Exon	1 CDS	NC_009149.2	69484785	69485306	522	minus
	Intron	1	NC_000012.12	52383799	52385039	1241	minus		Intron	1	NC_006609.3	2684415	2685645	1231	plus	Intron	1	NC_009149.2	69483618	69484784	1167	minus
	Exon	2	NC_000012.12	52383590	52383798	209	minus		Exon	2	NC_006609.3	2685646	2685854	209	plus	Exon	2	NC_009149.2	69483409	69483617	209	minus
	Intron	2	NC_000012.12	52383066	52383589	524	minus		Intron	2	NC_006609.3	2685855	2686470	616	plus	Intron	2	NC_009149.2	69482794	69483408	615	minus
	Exon	3	NC_000012.12	52383005	52383065	61	minus		Exon	3	NC_006609.3	2686471	2686531	61	plus	Exon	3	NC_009149.2	69482733	69482793	61	minus
	Intron	3	NC_000012.12	52382533	52383004	472	minus		Intron	3	NC_006609.3	2686532	2687080	549	plus	Intron	3	NC_009149.2	69482242	69482732	491	minus
	Exon	4	NC_000012.12	52382437	52382532	96	minus		Exon	4	NC_006609.3	2687081	2687176	96	plus	Exon	4	NC_009149.2	69482146	69482241	96	minus
	Intron	4	NC_000012.12	52381526	52382436	911	minus		Intron	4	NC_006609.3	2687177	2688226	1050	plus	Intron	4	NC_009149.2	69481227	69482145	919	minus
	Exon	5	NC_000012.12	52381361	52381525	165	minus		Exon	5	NC_006609.3	2688227	2688391	165	plus	Exon	5	NC_009149.2	69481062	69481226	165	minus
	Intron	5	NC_000012.12	52381206	52381360	155	minus		Intron	5	NC_006609.3	2688392	2688552	161	plus	Intron	5	NC_009149.2	69480909	69481061	153	minus
	Exon	6	NC_000012.12	52381080	52381205	126	minus		Exon	6	NC_006609.3	2688553	2688678	126	plus	Exon	6	NC_009149.2	69480783	69480908	126	minus
	Intron	6	NC_000012.12	52380584	52381079	496	minus		Intron	6	NC_006609.3	2688679	2688795	117	plus	Intron	6	NC_009149.2	69480263	69480782	520	minus
	Exon	7	NC_000012.12	52380363	52380583	221	minus		Exon	7	NC_006609.3	2688796	2689016	221	plus	Exon	7	NC_009149.2	69480042	69480262	221	minus
	Intron	7	NC_000012.12	52379908	52380362	455	minus		Intron	7	NC_006609.3	2689017	2689493	477	plus	Intron	7	NC_009149.2	69479583	69480041	459	minus
	Exon	8	NC_000012.12	52379876	52379907	32	minus		Exon	8	NC_006609.3	2689494	2689525	32	plus	Exon	8	NC_009149.2	69479551	69479582	32	minus
	Intron	8	NC_000012.12	52378381	52379875	1495	minus		Intron	8	NC_006609.3	2689526	2691097	1572	plus	Intron	8	NC_009149.2	69478177	69479550	1374	minus
	Exon	9 CDS	NC_000012.12	52378034	52378380	347	minus		Exon	9 CDS	NC_006609.3	2691098	2691441	344	plus	Exon	9 CDS	NC_009149.2	69477881	69478176	296	minus
	Exon	9 UTR	NC_000012.12	52377812	52378033	222	minus		Exon	9 UTR	NC_006609.3	2691442	2692267	826	plus	Exon	9 UTR	NC_009149.2	69477026	69477880	855	minus
	Total size (bp)					7822			Total size (bp)					8408		Total size (bp)					8349
	Number of amino acids					600			Number of amino acids					586		Number of amino acids					575
KRT85 (dog LOC486527; horse LOC100062985)	Feature	Feature #	Human Chr	Human Start	Human Stop	Size	Orientation	Human Accession	Feature	Feature #	Dog Chr	Dog Start	Dog Stop	Size	Orientation	Feature	Feature #	Horse Chr	Horse Start	Horse Stop	Size	Orientation	Horse: Gap (chr6:69459932-69460612) in reference genome assembly. Coordinates for exon and intron 7 are missing. A new entry for this gene has been submitted to the EMBL database, accessions LT576418 (primary genomic sequence spanning the gap) and LT576420 (complete gene assembled from existing reference genome and the newly derived sequence)
	Exon	1 UTR	NC_000012.12	52367406	52367525	120	minus	NM_002283.3	Exon	1 UTR	NC_006609.3	2706228	2706351	124	plus	Exon	1 UTR	NC_009149.2	69464811	69464932	122	minus
	Exon	1 CDS	NC_000012.12	52366986	52367405	420	minus		Exon	1 CDS	NC_006609.3	2706352	2706771	420	plus	Exon	1 CDS	NC_009149.2	69464391	69464810	420	minus
	Intron	1	NC_000012.12	52365171	52366985	1815	minus		Intron	1	NC_006609.3	2706772	2708735	1964	plus	Intron	1	NC_009149.2	69463057	69464390	1334	minus
	Exon	2	NC_000012.12	52364962	52365170	209	minus		Exon	2	NC_006609.3	2708736	2708944	209	plus	Exon	2	NC_009149.2	69462848	69463056	209	minus
	Intron	2	NC_000012.12	52364367	52364961	595	minus		Intron	2	NC_006609.3	2708945	2709540	596	plus	Intron	2	NC_009149.2	69462272	69462847	576	minus
	Exon	3	NC_000012.12	52364306	52364366	61	minus		Exon	3	NC_006609.3	2709541	2709601	61	plus	Exon	3	NC_009149.2	69462211	69462271	61	minus
	Intron	3	NC_000012.12	52364164	52364305	142	minus		Intron	3	NC_006609.3	2709602	2709730	129	plus	Intron	3	NC_009149.2	69462053	69462210	158	minus
	Exon	4	NC_000012.12	52364068	52364163	96	minus		Exon	4	NC_006609.3	2709731	2709826	96	plus	Exon	4	NC_009149.2	69461957	69462052	96	minus
	Intron	4	NC_000012.12	52363411	52364067	657	minus		Intron	4	NC_006609.3	2709827	2710472	646	plus	Intron	4	NC_009149.2	69461284	69461956	673	minus
	Exon	5	NC_000012.12	52363246	52363410	165	minus		Exon	5	NC_006609.3	2710473	2710637	165	plus	Exon	5	NC_009149.2	69461119	69461283	165	minus
	Intron	5	NC_000012.12	52362980	52363245	266	minus		Intron	5	NC_006609.3	2710638	2710834	197	plus	Intron	5	NC_009149.2	69460856	69461118	263	minus
	Exon	6	NC_000012.12	52362854	52362979	126	minus		Exon	6	NC_006609.3	2710835	2710960	126	plus	Exon	6	NC_009149.2	69460730	69460855	126	minus
	Intron	6	NC_000012.12	52362472	52362853	382	minus		Intron	6	NC_006609.3	2710961	2711350	390	plus	Intron	6	NC_009149.2	69459233	69460729	1497	minus
	Exon	7	NC_000012.12	52362251	52362471	221	minus		Exon	7	NC_006609.3	2711351	2711571	221	plus	Exon	7	NC_009149.2			221	minus
	Intron	7	NC_000012.12	52361499	52362250	752	minus		Intron	7	NC_006609.3	2711572	2712319	748	plus	Intron	7	NC_009149.2				minus
	Exon	8	NC_000012.12	52361467	52361498	32	minus		Exon	8	NC_006609.3	2712320	2712351	32	plus	Exon	8	NC_009149.2	69459201	69459232	32	minus
	Intron	8	NC_000012.12	52361047	52361466	420	minus		Intron	8	NC_006609.3	2712352	2712708	357	plus	Intron	8	NC_009149.2	69458764	69459200	437	minus
	Exon	9 CDS	NC_000012.12	52360853	52361046	194	minus		Exon	9 CDS	NC_006609.3	2712709	2712902	194	plus	Exon	9 CDS	NC_009149.2	69458570	69458763	194	minus
	Exon	9 UTR	NC_000012.12	52360006	52360852	847	minus		Exon	9 UTR	NC_006609.3	2712903	2713688	786	plus	Exon	9 UTR	NC_009149.2	69457769	69458569	801	minus
	Total size (bp)					7520			Total size (bp)					7461		Total size (bp)
	Number of amino acids					507			Number of amino acids					507		Number of amino acids					507
KRT86 (dog LOC486530; horse LOC100062959)	Feature	Feature #	Human Chr	Human Start	Human Stop	Size	Orientation	Human Accession	Feature	Feature #	Dog Chr	Dog Start	Dog Stop	Size	Orientation	Feature	Feature #	Horse Chr	Horse Start	Horse Stop	Size	Orientation
	Exon	1 UTR	NC_000012.12	52301865	52301916	52	plus	NM_002284.3	Exon	1 UTR	NC_006609.3	2767068	2767128	61	minus	Exon	1 UTR	NC_009149.2	69402595	69402661	67	plus
	Exon	1 CDS	NC_000012.12	52301917	52302285	369	plus		Exon	1 CDS	NC_006609.3	2766699	2767067	369	minus	Exon	1 CDS	NC_009149.2	69402662	69403030	369	plus
	Intron	1	NC_000012.12	52302286	52303099	814	plus		Intron	1	NC_006609.3	2766015	2766698	684	minus	Intron	1	NC_009149.2	69403031	69403760	730	plus
	Exon	2	NC_000012.12	52303100	52303308	209	plus		Exon	2	NC_006609.3	2765806	2766014	209	minus	Exon	2	NC_009149.2	69403761	69403969	209	plus
	Intron	2	NC_000012.12	52303309	52304110	802	plus		Intron	2	NC_006609.3	2765036	2765805	770	minus	Intron	2	NC_009149.2	69403970	69404750	781	plus
	Exon	3	NC_000012.12	52304111	52304171	61	plus		Exon	3	NC_006609.3	2764975	2765035	61	minus	Exon	3	NC_009149.2	69404751	69404811	61	plus
	Intron	3	NC_000012.12	52304172	52304931	760	plus		Intron	3	NC_006609.3	2764273	2764974	702	minus	Intron	3	NC_009149.2	69404812	69405583	772	plus
	Exon	4	NC_000012.12	52304932	52305027	96	plus		Exon	4	NC_006609.3	2764177	2764272	96	minus	Exon	4	NC_009149.2	69405584	69405679	96	plus
	Intron	4	NC_000012.12	52305028	52305239	212	plus		Intron	4	NC_006609.3	2763966	2764176	211	minus	Intron	4	NC_009149.2	69405680	69405901	222	plus
	Exon	5	NC_000012.12	52305240	52305404	165	plus		Exon	5	NC_006609.3	2763801	2763965	165	minus	Exon	5	NC_009149.2	69405902	69406066	165	plus
	Intron	5	NC_000012.12	52305405	52305662	258	plus		Intron	5	NC_006609.3	2763604	2763800	197	minus	Intron	5	NC_009149.2	69406067	69406343	277	plus
	Exon	6	NC_000012.12	52305663	52305788	126	plus		Exon	6	NC_006609.3	2763478	2763603	126	minus	Exon	6	NC_009149.2	69406344	69406469	126	plus
	Intron	6	NC_000012.12	52305789	52306059	271	plus		Intron	6	NC_006609.3	2763241	2763477	237	minus	Intron	6	NC_009149.2	69406470	69406718	249	plus
	Exon	7	NC_000012.12	52306060	52306280	221	plus		Exon	7	NC_006609.3	2763020	2763240	221	minus	Exon	7	NC_009149.2	69406719	69406939	221	plus
	Intron	7	NC_000012.12	52306281	52308232	1952	plus		Intron	7	NC_006609.3	2761200	2763019	1820	minus	Intron	7	NC_009149.2	69406940	69408829	1890	plus
	Exon	8	NC_000012.12	52308233	52308264	32	plus		Exon	8	NC_006609.3	2761168	2761199	32	minus	Exon	8	NC_009149.2	69408830	69408861	32	plus
	Intron	8	NC_000012.12	52308265	52308403	139	plus		Intron	8	NC_006609.3	2761044	2761167	124	minus	Intron	8	NC_009149.2	69408862	69409000	139	plus
	Exon	9 CDS	NC_000012.12	52308404	52308585	182	plus		Exon	9 CDS	NC_006609.3	2760865	2761043	179	minus	Exon	9 CDS	NC_009149.2	69409001	69409182	182	plus
	Exon	9 UTR	NC_000012.12	52308586	52309163	578	plus		Exon	9 UTR	NC_006609.3	2760351	2760864	514	minus	Exon	9 UTR	NC_009149.2	69409183	69409754	572	plus
	Total size (bp)					7299	plus		Total size (bp)					6778		Total size (bp)					7160
	Number of amino acids					486			Number of amino acids					485		Number of amino acids					486
KRT87P (dog LOC486533; horse LOC102149880)	Feature	Feature #	Human Chr	Human Start	Human Stop	Size	Orientation	Human Accession	Feature	Feature #	Dog Chr	Dog Start	Dog Stop	Size	Orientation	Feature	Feature #	Horse Chr	Horse Start	Horse Stop	Size	Orientation	Horse: low and uneven RNA-Seq coverage across exons for transcription in the region of this pseudogene (gene ?). Due to low read coverage our annotation has low reliability.
	pseudogene	1	NC_000012.12	52252026	52258521	6496	minus	NG_000944.2	pseudogene	1	NC_006609.3	2804954	2811657	6704	plus	Exon	1 UTR	NC_009149.2	69361764			minus
																Exon	1 CDS	NC_009149.2	69361645	69361763	119	minus
																Intron	1	NC_009149.2	69360052	69361644	1593	minus
																Exon	2	NC_009149.2	69359894	69360051	158	minus
																Intron	2	NC_009149.2	69359300	69359893	594	minus
																Exon	3	NC_009149.2	69359282	69359299	18	minus
																Intron	3	NC_009149.2		69359281		minus
																Exon	4	NC_009149.2	69358249			minus
																Intron	4	NC_009149.2	69357822	69358248	427	minus
																Exon	5	NC_009149.2	69357642	69357821	180	minus
																Intron	5	NC_009149.2	69357477	6935821		minus
																Exon	6	NC_009149.2	69357351	69357476	126	minus
																Intron	6	NC_009149.2	69356818	69357350	533	minus
																Exon	7	NC_009149.2	69356596	69356817	222	minus
																Intron	7	NC_009149.2	69355855	69356595	741	minus
																Exon	8 CDS	NC_009149.2		69355854		minus
																Exon	8 UTR	NC_009149.2				minus
																Total size (bp)
																Number of amino acids
KRT88 / KRT88P (dog LOC608165; horse LOC100062875)	Feature	Feature #	Human Chr	Human Start	Human Stop	Size	Orientation	Human Accession	Feature	Feature #	Dog Chr	Dog Start	Dog Stop	Size	Orientation	Feature	Feature #	Horse Chr	Horse Start	Horse Stop	Size	Orientation	Dog: Low read coverage in RNA-Seq data and untypical number of exons indicate that this annotation might be wrong or that the gene has become a pseudogene.
	pseudogene	1	NC_000012.12	52263781	52268497	4717	plus	NG_000943.3	Exon	1 UTR	NC_006609.3	2792636	2792714	79	minus	Exon	1 UTR	NC_009149.2				plus
									Exon	1 CDS	NC_006609.3	2792633	2792635	3	minus	Exon	1 CDS	NC_009149.2	69366378	69366806	429	plus
									Intron	1	NC_006609.3	2791074	2792632	1559	minus	Intron	1	NC_009149.2	69366807	69367560	754	plus
									Exon	2	NC_006609.3	2790969	2791073	105	minus	Exon	2	NC_009149.2	69367561	69367769	209	plus
									Intron	2	NC_006609.3	2789475	2790968	1494	minus	Intron	2	NC_009149.2	69367770	69368448	679	plus
									Exon	3	NC_006609.3	2789254	2789474	221	minus	Exon	3	NC_009149.2	69368449	69368509	61	plus
									Intron	3	NC_006609.3	2788304	2789253	950	minus	Intron	3	NC_009149.2	69368510	69368911	402	plus
									Exon	4	NC_006609.3	2788272	2788303	32	minus	Exon	4	NC_009149.2	69368912	69369007	96	plus
									Intron	4	NC_006609.3	2787825	2788271	447	minus	Intron	4	NC_009149.2	69369008	69369221	214	plus
									Exon	5 CDS	NC_006609.3	2787724	2787824	101	minus	Exon	5	NC_009149.2	69369222	69369386	165	plus
									Exon	5 UTR	NC_006609.3	2787394	2787723	330	minus	Intron	5	NC_009149.2	69369387	69369651	265	plus
									Total size (bp)					5321		Exon	6	NC_009149.2	69369652	69369777	126	plus
									Number of amino acids					153		Intron	6	NC_009149.2	69369778	69370025	248	plus
																Exon	7	NC_009149.2	69370026	69370246	221	plus
																Intron	7	NC_009149.2	69370247	69371087	841	plus
																Exon	8	NC_009149.2	69371088	69371119	32	plus
																Intron	8	NC_009149.2	69371120	69371673	554	plus
																Exon	9 CDS	NC_009149.2	69371674	69371786	113	plus
																Exon	9 UTR	NC_009149.2	69371787	69372157	371	plus
																Total size (bp)					5780
																Number of amino acids					483
KRT89 / KRT89P	Feature	Feature #	Human Chr	Human Start	Human Stop	Size	Orientation	Human Accession	Feature	Feature #	Dog Chr	Dog Start	Dog Stop	Size	Orientation	Feature	Feature #	Horse Chr	Horse Start	Horse Stop	Size	Orientation	Horse: G missing in reference between position 69446415 and 69446416.
	pseudogene	1	NC_000012.12	52341197	52353154	11958	plus	NG_000940.3	Exon	1 UTR	NC_006609.3	2731987	2732069	83	minus	Exon	1 UTR	NC_009149.2	69438994	69439075	82	plus
									Exon	1 CDS	NC_006609.3	2731561	2731986	426	minus	Exon	1 CDS	NC_009149.2	69439076	69439498	423	plus
									Intron	1	NC_006609.3	2729322	2731560	2239	minus	Intron	1	NC_009149.2	69439499	69442233	2735	plus
									Exon	2	NC_006609.3	2729113	2729321	209	minus	Exon	2	NC_009149.2	69442234	69442442	209	plus
									Intron	2	NC_006609.3	2727566	2729112	1547	minus	Intron	2	NC_009149.2	69442443	69443828	1386	plus
									Exon	3	NC_006609.3	2727505	2727565	61	minus	Exon	3	NC_009149.2	69443829	69443889	61	plus
									Intron	3	NC_006609.3	2726910	2727504	595	minus	Intron	3	NC_009149.2	69443890	69444936	1047	plus
									Exon	4	NC_006609.3	2726814	2726909	96	minus	Exon	4	NC_009149.2	69444937	69445032	96	plus
									Intron	4	NC_006609.3	2726150	2726813	664	minus	Intron	4	NC_009149.2	69445033	69445995	963	plus
									Exon	5	NC_006609.3	2725985	2726149	165	minus	Exon	5	NC_009149.2	69445996	69446160	165	plus
									Intron	5	NC_006609.3	2725761	2725984	224	minus	Intron	5	NC_009149.2	69446161	69446383	223	plus
									Exon	6	NC_006609.3	2725635	2725760	126	minus	Exon	6	NC_009149.2	69446384	69446508	125	plus
									Intron	6	NC_006609.3	2722640	2725634	2995	minus	Intron	6	NC_009149.2	69446509	69449249	2741	plus
									Exon	7	NC_006609.3	2722419	2722639	221	minus	Exon	7	NC_009149.2	69449250	69449470	221	plus
									Intron	7	NC_006609.3	2719953	2722418	2466	minus	Intron	7	NC_009149.2	69449471	69451955	2485	plus
									Exon	8	NC_006609.3	2719921	2719952	32	minus	Exon	8	NC_009149.2	69451956	69451987	32	plus
									Intron	8	NC_006609.3	2719243	2719920	678	minus	Intron	8	NC_009149.2	69451988	69452707	720	plus
									Exon	9 CDS	NC_006609.3	2719091	2719242	152	minus	Exon	9 CDS	NC_009149.2	69452708	69452859	152	plus
									Exon	9 UTR	NC_006609.3	2718486	2719090	605	minus	Exon	9 UTR	NC_009149.2	69452860	69453520	661	plus
									Total size (bp)					13584		Total size (bp)					14527
									Number of amino acids					495		Number of amino acids					493.667		Horse: The true length of the KRT89 protein is 494 amino acids. (Due to the fact that there is an missing base in exon 6 of the genome reference).
KRT90 / KRT90P (formerly KRT124 in humans; dog LOC486524)	Feature	Feature #	Human Chr	Human Start	Human Stop	Size	Orientation	Human Accession	Feature	Feature #	Dog Chr	Dog Start	Dog Stop	Size	Orientation	Feature	Feature #	Horse Chr	Horse Start	Horse Stop	Size	Orientation
	pseudogene	1	NC_000012.12	52413861	52419240	5380	minus	NG_000938.3	Exon	1 UTR	NC_006609.3				plus	Exon	1 UTR	NC_009149.2				minus
									Exon	1 CDS	NC_006609.3	2647396	2647875	480	plus	Exon	1 CDS	NC_009149.2	69521159	69521638	480	minus
									Intron	1	NC_006609.3	2647876	2649707	1832	plus	Intron	1	NC_009149.2	69519308	69521158	1851	minus
									Exon	2	NC_006609.3	2649708	2649916	209	plus	Exon	2	NC_009149.2	69519099	69519307	209	minus
									Intron	2	NC_006609.3	2649917	2653006	3090	plus	Intron	2	NC_009149.2	69516967	69519098	2132	minus
									Exon	3	NC_006609.3	2653007	2653067	61	plus	Exon	3	NC_009149.2	69516906	69516966	61	minus
									Intron	3	NC_006609.3	2653068	2653857	790	plus	Intron	3	NC_009149.2	69516124	69516905	782	minus
									Exon	4	NC_006609.3	2653858	2653953	96	plus	Exon	4	NC_009149.2	69516028	69516123	96	minus
									Intron	4	NC_006609.3	2653954	2656146	2193	plus	Intron	4	NC_009149.2	69513953	69516027	2075	minus
									Exon	5	NC_006609.3	2656147	2656311	165	plus	Exon	5	NC_009149.2	69513788	69513952	165	minus
									Intron	5	NC_006609.3	2656312	2657104	793	plus	Intron	5	NC_009149.2	69513050	69513787	738	minus
									Exon	6	NC_006609.3	2657105	2657230	126	plus	Exon	6	NC_009149.2	69512924	69513049	126	minus
									Intron	6	NC_006609.3	2657231	2657713	483	plus	Intron	6	NC_009149.2	69512433	69512923	491	minus
									Exon	7	NC_006609.3	2657714	2657934	221	plus	Exon	7	NC_009149.2	69512212	69512432	221	minus
									Intron	7	NC_006609.3	2657935	2658548	614	plus	Intron	7	NC_009149.2	69511619	69512211	593	minus
									Exon	8	NC_006609.3	2658549	2658583	35	plus	Exon	8	NC_009149.2	69511584	69511618	35	minus
									Intron	8	NC_006609.3	2658584	2659680	1097	plus	Intron	8	NC_009149.2	69510243	69511583	1341	minus
									Exon	9 CDS	NC_006609.3	2659681	2659883	203	plus	Exon	9 CDS	NC_009149.2	69510070	69510242	173	minus
									Exon	9 UTR	NC_006609.3	2659884	2661555	1672	plus	Exon	9 UTR	NC_009149.2	69508448	69510069	1622	minus
									Total size (bp)					14160		Total size (bp)					13191
									Number of amino acids					531		Number of amino acids					521
KRT125P	Feature	Feature #	Human Chr	Human Start	Human Stop	Size	Orientation	Human Accession	Feature	Feature #	Dog Chr	Dog Start	Dog Stop	Size	Orientation	Feature	Feature #	Horse Chr	Horse Start	Horse Stop	Size	Orientation
	pseudogene	1	NC_000012.12	52735266	52736142	877	minus	NG_024014.1	NA	NA	NA	NA	NA	NA	NA	NA	NA	NA	NA	NA	NA	NA
KRT126 / KRT126P (dog LOC100683250; horse LOC100063342)	Feature	Feature #	Human Chr	Human Start	Human Stop	Size	Orientation	Human Accession	Feature	Feature #	Dog Chr	Dog Start	Dog Stop	Size	Orientation	Feature	Feature #	Horse Chr	Horse Start	Horse Stop	Size	Orientation
	pseudogene	1	NC_000012.12	52715567	52719040	3474	minus	NG_005685.3	Exon	1 UTR	NC_006609.3	2383312	2383401	90	plus	NA	NA	NA	NA	NA	NA	NA
									Exon	1 CDS	NC_006609.3	2383402	2384127	726	plus	NA	NA	NA	NA	NA	NA	NA
									Intron	1	NC_006609.3	2384128	2385860	1733	plus	NA	NA	NA	NA	NA	NA	NA
									Exon	2	NC_006609.3	2385861	2386081	221	plus	NA	NA	NA	NA	NA	NA	NA
									Intron	2	NC_006609.3	2386082	2387160	1079	plus	NA	NA	NA	NA	NA	NA	NA
									Exon	3	NC_006609.3	2387161	2387221	61	plus	NA	NA	NA	NA	NA	NA	NA
									Intron	3	NC_006609.3	2387222	2387855	634	plus	NA	NA	NA	NA	NA	NA	NA
									Exon	4	NC_006609.3	2387856	2387951	96	plus	NA	NA	NA	NA	NA	NA	NA
									Intron	4	NC_006609.3	2387952	2388181	230	plus	NA	NA	NA	NA	NA	NA	NA
									Exon	5	NC_006609.3	2388182	2388346	165	plus	NA	NA	NA	NA	NA	NA	NA
									Intron	5	NC_006609.3	2388347	2389392	1046	plus	NA	NA	NA	NA	NA	NA	NA
									Exon	6	NC_006609.3	2389393	2389518	126	plus	NA	NA	NA	NA	NA	NA	NA
									Intron	6	NC_006609.3	2389519	2390146	628	plus	NA	NA	NA	NA	NA	NA	NA
									Exon	7	NC_006609.3	2390147	2390367	221	plus	NA	NA	NA	NA	NA	NA	NA
									Intron	7	NC_006609.3	2390368	2391028	661	plus	NA	NA	NA	NA	NA	NA	NA
									Exon	8	NC_006609.3	2391029	2391063	35	plus	NA	NA	NA	NA	NA	NA	NA
									Intron	8	NC_006609.3	2391064	2391387	324	plus	NA	NA	NA	NA	NA	NA	NA
									Exon	9 CDS	NC_006609.3	2391388	2391629	242	plus	NA	NA	NA	NA	NA	NA	NA
									Exon	9 UTR	NC_006609.3	2391630	2392270	641	plus	NA	NA	NA	NA	NA	NA	NA
									Total size (bp)					8869		NA	NA	NA	NA	NA	NA	NA
									Number of amino acids					630		NA	NA	NA	NA	NA	NA	NA
KRT127	Feature	Feature #	Human Chr	Human Start	Human Stop	Size	Orientation	Human Accession	Feature	Feature #	Dog Chr	Dog Start	Dog Stop	Size	Orientation	Feature	Feature #	Horse Chr	Horse Start	Horse Stop	Size	Orientation
	pseudogene	1	NC_000012.12	52751978	52753821	1844	minus	NG_024015.1	Exon	1 UTR	NC_006609.3	2360875	2360921	47	plus	NA	NA	NA	NA	NA	NA	NA
									Exon	1 CDS	NC_006609.3	2360922	2361476	555	plus	NA	NA	NA	NA	NA	NA	NA
									Intron	1	NC_006609.3	2361477	2361593	117	plus	NA	NA	NA	NA	NA	NA	NA
									Exon	2	NC_006609.3	2361594	2361814	221	plus	NA	NA	NA	NA	NA	NA	NA
									Intron	2	NC_006609.3	2361815	2363072	1258	plus	NA	NA	NA	NA	NA	NA	NA
									Exon	3	NC_006609.3	2363073	2363133	61	plus	NA	NA	NA	NA	NA	NA	NA
									Intron	3	NC_006609.3	2363134	2363652	519	plus	NA	NA	NA	NA	NA	NA	NA
									Exon	4	NC_006609.3	2363653	2363748	96	plus	NA	NA	NA	NA	NA	NA	NA
									Intron	4	NC_006609.3	2363749	2364231	483	plus	NA	NA	NA	NA	NA	NA	NA
									Exon	5	NC_006609.3	2364232	2364396	165	plus	NA	NA	NA	NA	NA	NA	NA
									Intron	5	NC_006609.3	2364397	2364743	347	plus	NA	NA	NA	NA	NA	NA	NA
									Exon	6	NC_006609.3	2364744	2364869	126	plus	NA	NA	NA	NA	NA	NA	NA
									Intron	6	NC_006609.3	2364870	2365568	699	plus	NA	NA	NA	NA	NA	NA	NA
									Exon	7	NC_006609.3	2365569	2365789	221	plus	NA	NA	NA	NA	NA	NA	NA
									Intron	7	NC_006609.3	2365790	2366514	725	plus	NA	NA	NA	NA	NA	NA	NA
									Exon	8	NC_006609.3	2366515	2366549	35	plus	NA	NA	NA	NA	NA	NA	NA
									Intron	8	NC_006609.3	2366550	2366886	337	plus	NA	NA	NA	NA	NA	NA	NA
									Exon	9 CDS	NC_006609.3	2366887	2367152	266	plus	NA	NA	NA	NA	NA	NA	NA
									Exon	9 UTR	NC_006609.3	2367153	2367990	838	plus	NA	NA	NA	NA	NA	NA	NA
									Total size (bp)					7116		NA	NA	NA	NA	NA	NA	NA
									Number of amino acids					581		NA	NA	NA	NA	NA	NA	NA
KRT128P / KRT128 (horse LOC100063179)	Feature	Feature #	Human Chr	Human Start	Human Stop	Size	Orientation	Human Accession	Feature	Feature #	Dog Chr	Dog Start	Dog Stop	Size	Orientation	Feature	Feature #	Horse Chr	Horse Start	Horse Stop	Size	Orientation	Human: the annotation is based on annotation release 108
	pseudogene	1	NC_000012.12	52632866	52634456	1590	minus	NG_043793.1	NA	NA	NA	NA	NA	NA	NA	Exon	1 UTR	NC_009149.2				minus
									NA	NA	NA	NA	NA	NA	NA	Exon	1 CDS	NC_009149.2	69724252	69724743	492	minus
									NA	NA	NA	NA	NA	NA	NA	Intron	1	NC_009149.2	69722221	69724251	2031	minus
									NA	NA	NA	NA	NA	NA	NA	Exon	2	NC_009149.2	69722006	69722220	215	minus
									NA	NA	NA	NA	NA	NA	NA	Intron	2	NC_009149.2	69721774	69722005	232	minus
									NA	NA	NA	NA	NA	NA	NA	Exon	3	NC_009149.2	69721713	69721773	61	minus
									NA	NA	NA	NA	NA	NA	NA	Intron	3	NC_009149.2	69721334	69721712	379	minus
									NA	NA	NA	NA	NA	NA	NA	Exon	4	NC_009149.2	69721238	69721333	96	minus
									NA	NA	NA	NA	NA	NA	NA	Intron	4	NC_009149.2	69721069	69721237	169	minus
									NA	NA	NA	NA	NA	NA	NA	Exon	5	NC_009149.2	69720904	69721068	165	minus
									NA	NA	NA	NA	NA	NA	NA	Intron	5	NC_009149.2	69720050	69720903	854	minus
									NA	NA	NA	NA	NA	NA	NA	Exon	6	NC_009149.2	69719924	69720049	126	minus
									NA	NA	NA	NA	NA	NA	NA	Intron	6	NC_009149.2	69719724	69719923	200	minus
									NA	NA	NA	NA	NA	NA	NA	Exon	7	NC_009149.2	69719503	69719723	221	minus
									NA	NA	NA	NA	NA	NA	NA	Intron	7	NC_009149.2	69718866	69719502	637	minus
									NA	NA	NA	NA	NA	NA	NA	Exon	8	NC_009149.2	69718831	69718865	35	minus
									NA	NA	NA	NA	NA	NA	NA	Intron	8	NC_009149.2	69718364	69718830	467	minus
									NA	NA	NA	NA	NA	NA	NA	Exon	9	NC_009149.2	69718316	69718363	48	minus
									NA	NA	NA	NA	NA	NA	NA	Intron	9	NC_009149.2	69718219	69718315	97	minus
									NA	NA	NA	NA	NA	NA	NA	Exon	10 CDS	NC_009149.2	69718133	69718218	86	minus
									NA	NA	NA	NA	NA	NA	NA	Exon	10 UTR	NC_009149.2				minus
									NA	NA	NA	NA	NA	NA	NA	Total size (bp)					6611
									NA	NA	NA	NA	NA	NA	NA	Number of amino acids					514
KRT222 / KRT222P	Feature	Feature #	Human Chr	Human Start	Human Stop	Size	Orientation	Human Accession	Feature	Feature #	Dog Chr	Dog Start	Dog Stop	Size	Orientation	Feature	Feature #	Horse Chr	Horse Start	Horse Stop	Size	Orientation
	Exon	1 UTR	NC_000017.11	40665100	40665164	65	minus	NM_152349.2	Exon	1 UTR	NC_006591.3	22000851	22000970	120	plus	Exon	1 UTR	NC_009154.2				plus
	Exon	1 CDS	NC_000017.11	40665004	40665099	96	minus		Exon	1 CDS	NC_006591.3	22000982	22001077	96	plus	Exon	1 CDS	NC_009154.2	21971057	21971152	96	plus
	Intron	1	NC_000017.11	40662045	40665003	2959	minus		Intron	1	NC_006591.3	22001008	22003119	2112	plus	Intron	1	NC_009154.2	21971153	21974210	3058	plus
	Exon	2	NC_000017.11	40661916	40662044	129	minus		Exon	2 UTR	NC_006591.3	22003120	22003196	77	plus	Exon	2	NC_009154.2	21974211	21974339	129	plus
	Intron	2	NC_000017.11	40660208	40661915	1708	minus		Intron	2	NC_006591.3	22003197	22003948	752	plus	Intron	2	NC_009154.2	21974340	21975183	844	plus
	Exon	3	NC_000017.11	40659987	40660207	221	minus		Exon	3 UTR	NC_006591.3	22003947	22003987	41	plus	Exon	3	NC_009154.2	21975184	21975404	221	plus
	Intron	3	NC_000017.11	40657751	40659986	2236	minus		Intron	3	NC_006591.3	22003988	22004418	431	plus	Intron	3	NC_009154.2	21975405	21977537	2133	plus
	Exon	4	NC_000017.11	40657674	40657750	77	minus		Exon	4	NC_006591.3	22004419	22004547	129	plus	Exon	4	NC_009154.2	21977538	21977614	77	plus
	Intron	4	NC_000017.11	40657488	40657673	186	minus		Intron	4	NC_006591.3	22004548	22005272	725	plus	Intron	4	NC_009154.2	21977615	21977795	181	plus
	Exon	5	NC_000017.11	40657352	40657487	136	minus		Exon	5	NC_006591.3	22005273	22005493	221	plus	Exon	5	NC_009154.2	21977796	21977931	136	plus
	Intron	5	NC_000017.11	40656631	40657351	721	minus		Intron	5	NC_006591.3	22005494	22007103	1610	plus	Intron	5	NC_009154.2	21977932	21978362	431	plus
	Exon	6 CDS	NC_000017.11	40656402	40656630	229	minus		Exon	6	NC_006591.3	22007104	22007180	77	plus	Exon	6 CDS	NC_009154.2	21978363	21978591	229	plus
	Exon	6 UTR	NC_000017.11	40655620	40656401	782	minus		Intron	6	NC_006591.3	22007181	22007356	176	plus	Exon	6 UTR	NC_009154.2	21978592	21978704	113	plus
	Total size (bp)					9545			Exon	7	NC_006591.3	22007357	22007492	136	plus	Total size (bp)					7648	plus
	Number of amino acids					295			Intron	7	NC_006591.3	22007493	22007923	431	plus	Number of amino acids					295
									Exon	8 CDS	NC_006591.3	22007924	22008152	229	plus
									Exon	8 UTR	NC_006591.3	22008153	22009984	1832	plus
									Total size (bp)					9195
									Number of amino acids					295
KRT223P	Feature	Feature #	Human Chr	Human Start	Human Stop	Size	Orientation	Human Accession	Feature	Feature #	Dog Chr	Dog Start	Dog Stop	Size	Orientation	Feature	Feature #	Horse Chr	Horse Start	Horse Stop	Size	Orientation
	pseudogene	1	NC_000017.11	40717540	40721932	4393	minus	NG_009669.1	NA	NA	NA	NA	NA	NA	NA	NA	NA	NA	NA	NA	NA	NA
