# Supplementary material for: A curated catalog of canine and equine keratin genes
Source: PLoS One. 2017 Aug 28;12(8):e0180359. doi: 10.1371/journal.pone.0180359 (PMC5573215; doi:10.1371/journal.pone.0180359)
Supplement: S3 Table — (XLSX) [file pone.0180359.s009.xlsx]

## Sheet: Sheet1
S3 Table. Nomenclature (gene symbols) of human, canine and equine keratin genes.
NCBI gene symbol for human keratin genes (annotation release 107)	Gene symbol by Schweizer et al.a	Existing nomenclature for functional orthologs to human pseudogenes	NCBI gene symbol for canine keratin genes (annotation release 103)b	Suggested canine gene symbol and updated with annotation release 104c	GeneID	NCBI gene symbol for equine keratin genes (annotation release 101)b	Suggested equine gene symbol and updated with annotation release 102c	GeneID
KRT1	KRT1	-	KRT1	KRT1	444857	KRT1	KRT1	100063302
KRT2	KRT2	-	KRT2	KRT2	444850	KRT2	KRT2A	100063215
-	-	-	-	-		LOC100061764	KRT2B	100061764
-	-	-	-	-		LOC100146152	KRT2C	100146152
KRT3	KRT3	-	KRT3 / LOC100683401	KRT3	100683401	KRT3	KRT3	100061828
KRT4	KRT4	-	KRT4	KRT4	100682832	KRT4	KRT4	100061857
KRT5	KRT5	-	KRT5	KRT5	100687760	KRT5	KRT5	100061626
KRT6A	KRT6A	-	LOC486523	KRT6A	486523	LOC100061595	KRT6A	100061595
KRT6B	KRT6B	-	LOC100687987	KRT6B	100687987	LOC100061560	KRT6B	100061560
KRT6C	KRT6C	-	-	-		LOC100061525	KRT6C	100061525
-	-	-	-	-		LOC102150124	KRT6P	102150124
KRT7	KRT7	-	KRT7	KRT7	477602	KRT7	KRT7	100062790
KRT8	KRT8	-	KRT8	KRT8	486513	KRT8	KRT8	100063511
KRT9	KRT9	-	KRT9	KRT9	490980	KRT9	KRT9P	102148895
KRT10	KRT10	-	KRT10	KRT10	491006	KRT10	KRT10A	100146924
-	-	-	-	-		LOC100053935	KRT10B	100053935
KRT12	KRT12	-	KRT12	KRT12	100034663	KRT12	KRT12	100067513
KRT13	KRT13	-	LOC490983	KRT13	490983	LOC100066675	KRT13	100066675
KRT14	KRT14	-	KRT14	KRT14	100685323	LOC100053489	KRT14	100053489
KRT15	KRT15	-	KRT15	KRT15	100685404	KRT15	KRT15	100066653
KRT16	KRT16	-	KRT16	KRT16	490978	LOC100066610	KRT16	100066610
KRT17	KRT17	-	KRT17	KRT17	490977	KRT17	KRT17	100053436
KRT18	KRT18	-	KRT18	KRT18	477601	KRT18	KRT18	100063542
KRT19	KRT19	-	KRT19	KRT19	100685481	KRT19	KRT19	100147127
KRT20	KRT20	-	KRT20	KRT20	608094	KRT20	KRT20	100053884
KRT23	KRT23	-	KRT23	KRT23	491005	KRT23	KRT23	100067426
KRT24	KRT24	-	KRT24	KRT24	491009	KRT24	KRT24	100067626
KRT25	KRT25	-	KRT25	KRT25	100686957	KRT25	KRT25	100054031
KRT26	KRT26	-	KRT26	KRT26	491008	LOC100067606	KRT26	100067606
KRT27	KRT27	-	KRT27	KRT27	491007	KRT27	KRT27	100053988
KRT28	KRT28	-	KRT28	KRT28	608107	LOC100067557	KRT28	100067557
KRT31	KRT31	-	LOC490988	KRT31	490988	LOC100066836	KRT31	100066836
KRT32	KRT32	-	KRT32	KRT32	490985	KRT32	KRT32	100066752
KRT33A	KRT33A	-	KRT33A	KRT33A	490991	LOC100066898	KRT33A	100066898
KRT33B	KRT33B	-	LOC607876	KRT33B	607876	LOC100066876	KRT33B	100066876
KRT34	KRT34	-	LOC490989	KRT34	490989	LOC100066856	KRT34	100066856
KRT35	KRT35	-	KRT35	KRT35	607814	KRT35	KRT35	100066728
KRT36	KRT36	-	KRT36	KRT36	490984	KRT36	KRT36	100066701
KRT37	KRT37	-	LOC490987	KRT37	490987	LOC100066792	KRT37	100066792
KRT38	KRT38	-	KRT38	KRT38	490986	-	-
KRT39	KRT39	-	KRT39	KRT39	491004	KRT39	KRT39	100067401
KRT40	KRT40	-	KRT40	KRT40	608072	KRT40	KRT40	100067378
KRT41P	KRT41P	KRT41 (NM_001009079.1)	KRT37	KRT41	607848	LOC100066813	KRT41P	100066813
KRT42P	KRT42P	KRT42d,(XM_548099.3); Krt42(NM_212483.2,NM_001008816.1)	KRT42	KRT42	490976	LOC100066586	KRT42	100066586
KRT43P	KRT221P	-	-	-		-	-
KRT71	KRT71	-	KRT71	KRT71	486522	KRT71	KRT71	100061657
KRT72	KRT72	-	KRT72	KRT72	486520	LOC100061693	KRT72	100061693
KRT73	KRT73	-	LOC608027	KRT73	608027	LOC100061725	KRT73	100061725
KRT74	KRT74	-	KRT74	KRT74	486521	LOC102150169	KRT74	102150169
KRT75	KRT75	-	LOC100683813	KRT75	100683813	LOC100061487	KRT75	100061487
KRT76	KRT76	-	KRT76	KRT76	486518	KRT76	KRT76	100063410
KRT77	KRT77	-	LOC100683333	KRT77	100683333	KRT77	KRT77	100061792
KRT78	KRT78	-	KRT78	KRT78	486514	KRT78	KRT78	100147555
KRT79	KRT79	-	KRT79	KRT79	486515	KRT79	KRT79	100061886
KRT80	KRT80	-	KRT80	KRT80	486534	KRT80	KRT80	100061386
KRT81	KRT81	-	LOC486531	KRT81	486531	LOC100062930	KRT81	100062930
KRT82	KRT82	-	KRT82	KRT82	486525	KRT82	KRT82	100063050
KRT83	KRT83	-	LOC486529	KRT83	486529	LOC100146665	KRT83	100146665
KRT84	KRT84	-	KRT84	KRT84	486526	KRT84	KRT84	100061422
KRT85	KRT85	-	LOC486527	KRT85	486527	LOC100062985	KRT85	100062985
KRT86	KRT86	-	LOC486530	KRT86	486530	LOC100062959	KRT86	100062959
KRT87P	KRT121P	Krt87 (NM_001003668.2)	LOC486533	KRT87P	486533	LOC102149880	KRT87P	102149880
KRT88P	KRT122P	Krt88 (NM_025487.3)	LOC608165	KRT88	608165	LOC100062875	KRT88	100062875
KRT89P	KRT123P	-	LOC486528	KRT89	486528	LOC100146362	KRT89	100146362
KRT90P	KRT124P	KRT124d; Krt90 (NM_177717.4)	LOC486524	KRT124	486524	LOC100061458	KRT124	100061458
KRT125P	KRT127P	-	-	-		-	-
KRT126P	KRT126P	-	LOC100683250	KRT126	100683250	LOC100063342	KRT126P	100063342
KRT127P	KRT128P	-	KRT3	KRT127	486519	-	-
KRT128P	KRT125P	-	-	-		LOC100063179	KRT128	100063179
-	-	-	-	-		LOC102149928	KRT129P	102149928
KRT222Pe	KRT222P	KRT222 (e.g. XM_005624526.2; XM_001500146.3); Krt222(e.g. NM_172946.2)	KRT222	KRT222	100687121	KRT222	KRT222	100054077
KRT223P	KRT223P	-	-	-		-	-
aSchweizer J, Bowden PE, Coulombe PA, Langbein L, Lane EB, Magin TM, et al. New consensus nomenclature for mammalian keratins. The Journal of Cell Biology. 2006;174(2):169-74.
bsorted according to our results
cWhen the currently used gene symbol by NCBI does not conform to the general nomenclature rules for keratin genes, we suggested a new gene symbol. Symbols indicated in red were updated by NCBI curators.
dCarter RA, Shekk V, de Laat MA, Pollitt CC, Galantino-Homer HL. Novel keratins identified by quantitative proteomic analysis as the major cytoskeletal proteins of equine (Equus caballus) hoof lamellar tissue. Journal of Animal Science. 2010;88(12):3843-55.
eThis gene symbol has recently been revised to KRT222.
