# Supplementary material for: A curated catalog of canine and equine keratin genes
Source: PLoS One. 2017 Aug 28;12(8):e0180359. doi: 10.1371/journal.pone.0180359 (PMC5573215; doi:10.1371/journal.pone.0180359)
Supplement: S4 Table — (XLSX) [file pone.0180359.s010.xlsx]

## Sheet: dog & horse-specific keratins
S4 Table. Summary of keratins encoded by genes that appear to be functional in dogs or horses, but inactivated or absent in the human genome
Dog
Protein	Length (aa)	Isolelectric point	Most similar human keratin	% Identity
KRT41	437	4.989	KRT37	74% in 414 aa overlap
KRT42	492	5.128	KRT17	80% in 366 aa overlap
KRT88	525	7.154	KRT71	92% in 525 aa overlap
KRT89	495	5.991	KRT85	74% in 502 aa overlap
KRT124	531	8.322	KRT75	64% in 549 aa overlap
KRT126	630	8.171	KRT3	81% in 350 aa overlap
KRT127	581	7.106	KRT3	68% in 348 aa overlap
Horse
Protein	Length (aa)	Isolelectric point	Most similar human keratin	% Identity
KRT10A	559	4.906	KRT10	92% in 314 aa overlap
KRT10B	596	4.965	KRT10	92% in 314 aa overlap
KRT42	453	5.181	KRT17	78% in 366 aa overlap
KRT2A	629	8.113	KRT2	86% in 369 aa overlap
KRT2B	618	8.697	KRT2	74% in 499 aa overlap
KRT2C	[618]	n.d.	KRT2	n.d.	equine reference genome assembly contains a gap; protein sequence only partially known
KRT88	483	8.089	KRT86	76% in 482 aa overlap
KRT89	494	5.478	KRT85	77% in 482 aa overlap
KR124	521	7.993	KRT75	65% in 549 aa overlap
KRT128	514	7.156	KRT73	56% in 473 aa overlap
