# Supplementary material for: A curated catalog of canine and equine keratin genes
Source: PLoS One. 2017 Aug 28;12(8):e0180359. doi: 10.1371/journal.pone.0180359 (PMC5573215; doi:10.1371/journal.pone.0180359)
Supplement: S5 Table — (XLSX) [file pone.0180359.s011.xlsx]

## Sheet: Dog
S5 Table: Genes with remaining differences between NCBI annotation and our manual curation.
GeneID	Old NCBI gene symbol	Updated NCBI gene symbol	Curated vs. RefSeq	RefSeq Accession	Updated RefSeq Accession	Curated vs updated RefSeq	RefSeq Curation Comments
486519	KRT3	KRT127	Different	XM_005637411.1		Different	RefSeq differs from curated annotation (uses a downstream start codon). Updated gene symbol.
100683333	LOC100683333	KRT77	Different	XM_005637413.1		No FASTA found	gap in the assembly. Updated gene symbol.
490980	KRT9	KRT9	Different	NM_001014285.1	XM_014116481.1	Different	XM_014116481.1 has additional splicing in the penultimate exon, compared to the curated FASTA. RNA-seq coverage is not complete. Will retain the RefSeq for now.
608165	LOC608165	KRT88	Different (low coverage)	XM_005636797.1	XM_014108366.1	Different	Updated RefSeq still differs from the curated annotation. NCBI annotates KRT88 in the opposite orientation.
100683250	LOC100683250	KRT126	Different	XM_005637412.1		Different	RefSeq differs from curated annotation (5' end of locus). Updated gene symbol.

## Sheet: Horse
GeneID	Old NCBI gene symbol	Updated NCBI gene symbol	Curated vs. RefSeq	Updated RefSeq Accession	Curated vs updated RefSeq	RefSeq Curation Comments
100063511	KRT8	KRT8	Different	XM_005614767.2	Different	Curated transcript is an NMD-candidate. Reference genome has a gap in the coding region. Concluded that XM_005614767.2 provides the best representation.
100063542	KRT18	KRT18	Different	XM_005614771.2	Different	Trace WGS and orthlogous protein data support the corrected model XM_005614771.2. No curation done.
100147555	KRT78	KRT78	Different	XM_014740785.1	Different	Updated RefSeq differs from curated annotation, gaps in genome. No curation done.
100062985	LOC100062985	KRT85	Different	XM_014741017.1	Different	RefSeq differs from curated annotation. Gap in genome, so cannot provide a better RefSeq. Updated the symbol.
100066610	LOC100066610	KRT16	Different	XM_005597406.2	Different	Updated RefSeq differs from curated annotation. Trace WGS data and protein orthologs support the RefSeq, so it is retained.
100053884	KRT20	KRT20	Different	XM_005597424.2	Different	Updated RefSeq differs from the curated annotation. The RefSeq is supported by RNA-seq data, while the curated annotation has unsupported splice sites (GC-AG across exons 6 and 7). Based on the alignment of orthologs, the reference genome seems to have a ~20nt deletion, so cannot make a better RefSeq.
100066813	LOC100066813	KRT41P*	Different	XM_001496988.2	Different	NCBI calls coding, curated authors call pseudogene. RefSeq will keep this as a protein-coding gene.
100063179	LOC100063179	KRT128	Too low coverage	XM_014740781.1	Different	Updated RefSeq is different from curated annotation. Updated the symbol.
100146152	LOC100146152	KRT2C	Gap	XM_014740782.1		curated annotation differs from the RefSeq. No curation possible due to a large gap in the reference genome assembly. Updated the symbol.
